# Supplementary material for: Synthesis, biological evaluation and induced fit docking simulation study ofd-glucose-conjugated 1H-1,2,3-triazoles having 4H-pyrano[2,3-d]pyrimidine ring as potential agents against bacteria and fungi
Source: Royal Society of Chemistry journal article supplement (doi:10.1039/d1nj05330b), 2022-01-01

***Supplementary Information for***

**Synthesis, biological evaluation and induced fit docking simulation study  
of D-glucose-conjugated 1*H*-1,2,3-triazoles having 4*H*-pyrano[2,3-*d*]pyrimidine ring as potential agents against bacteria and fungi**

Do Son Hai, <sup>a,b</sup> Nguyen Thi Thu Ha, <sup>a</sup> Do Tien Tung, <sup>a</sup> Cao Thi Le, <sup>a</sup> Nguyen Thi Kim Giang, <sup>a,b</sup> Nguyen Thi Thu Huong, <sup>a</sup> Hoang Huu Anh, <sup>a</sup> Hoang Thi Kim Van, <sup>a,c</sup> Vu Ngoc Toan, <sup>a,d</sup> Duong Ngoc Toan, <sup>a,e</sup> Nguyen Dinh Thanh\*<sup>a</sup>

<sup>1</sup> Faculty of Chemistry, VNU University of Science, 19 Le Thanh Tong, Ha Noi, Viet Nam

<sup>2</sup> Institute of Science and Technology, Ministry of Public Security of Vietnam, 47 Pham Van Dong, Cau Giay, Ha Noi, Vietnam

<sup>3</sup> Faculty of Chemical Technology, Viet Tri University of Industry, Tien Kien, Lam Thao, Phu Tho, Viet Nam

<sup>4</sup> Institute of New Technology, Academy of Military Science and Technology, Ministry of Defence, 17 Hoang Sam, Cau Giay, Ha Noi, Vietnam

<sup>5</sup> Faculty of Chemistry, Thai Nguyen University of Education, 20 Luong Ngoc Quyen, Thai Nguyen, Viet Nam

\*Corresponding author: ✉ Dr Nguyen Dinh Thanh; email: [nguyendinhthanh@hus.edu.vn](mailto:nguyendinhthanh@hus.edu.vn)

## EXPERIMENTAL PART

Melting points were determined by open capillary method on STUART SMP3 (BIBBY STERILIN, UK). The IR spectra were recorded on FT-IR Affinity-1S Spectrometer (Shimadzu, Japan) in KBr pellet. The  $^1\text{H}$  and  $^{13}\text{C}$  NMR spectra were recorded on Avance AV500 Spectrometer (Bruker, Germany) at 500 MHz and 125 MHz, respectively, using  $\text{DMSO-}d_6$  as solvent and TMS as an internal standard. ESI-mass spectra were recorded on LC-MS LTQ Orbitrap XL, ESI/HR-mass spectra were recorded on Thermo Scientific Exactive Plus Orbitrap spectrometers (ThermoScientific, USA) in methanol using ESI method. The analytical thin-layer chromatography (TLC) was performed on silica gel 60 WF<sub>254</sub>S aluminum sheets (Merck, Germany) and was visualized with UV light or by iodine vapor. Chemical reagents in high purity were purchased from the Merck Chemical Company (in Viet Nam). All materials were of reagent grade for organic synthesis. Ethyl ester of 2-amino-3-cyano-4-(substituted-phenyl)-4*H*-pyran-3-carboxylic acids **4a-4s** were prepared by using previous procedure [1], but THEAA was used as the catalyst under ultrasound-assisted conditions (*see below*). The corresponding 4*H*-pyrano[2,3-*d*]pyrimidines **5a-5s** were synthesized by modified previous procedures [1], while TFA was applied as a catalyst instead concentrated sulfuric acid (*see below*).

### 1. General procedure for synthesis of ethyl 6-amino-5-cyano-2-methyl-4-(substituted phenyl)-4*H*-pyran-3-carboxylates (**4a-4s**)

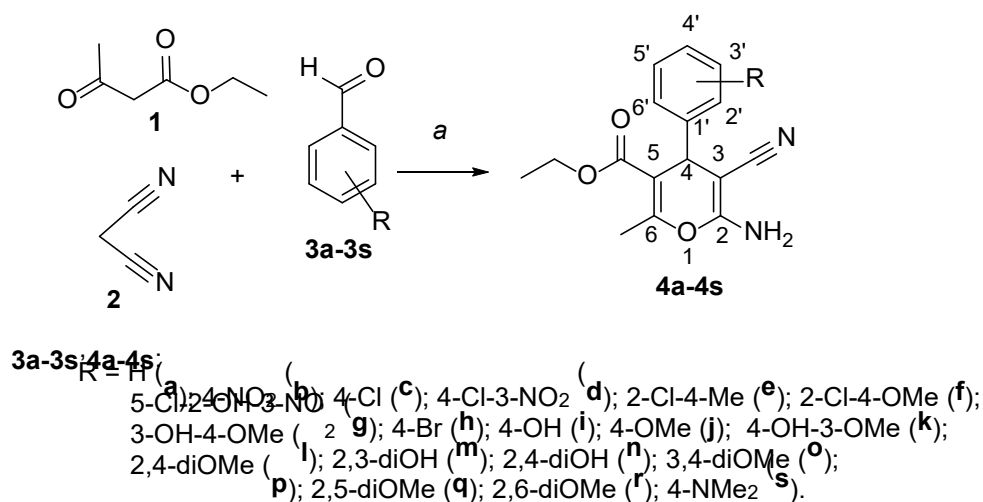

Scheme 1S. Synthesis of compounds **4a-4s**.

Ionic liquid tri-(2-hydroxyethyl)ammonium acetate [<sup>+</sup>HN(CH<sub>2</sub>CH<sub>2</sub>OH)<sub>3</sub>][<sup>-</sup>OAc] (THEAA) was prepared by neutralization of ethanolamine in ethanol with glacial acetic acid.

Triethanolamine (0.5 mol, 74.5 g) was dissolved in 100 mL of absolute ethanol to form a liquid mixture. This mixture was placed in a water bath of 25°C and equipped with a reflux condenser under vigorous stirring with a magnetic stirrer. A solution of acetic acid (0.5 mol) in absolute ethanol (100 mL) was added dropwise to the flask in about 90 min. The reaction lasted for 2 h. The solvent was removed by evaporation under reduced pressure. The resulting crude residue was dried under vacuum at 50°C for 48 h.

To a solution of ethyl acetoacetate **1** (5 mmol, 0.77g, 0.7 mL), malononitrile **2** (5 mmol, 0.33 g, 0.31 mL) and appropriate substituted benzaldehyde **3a-3s** (5 mmol) in 96% ethanol (10 mL) was added THEAA (5 mol%, 1.57 g). The reaction mixture was stirred at 25 °C for 20 min. The separated solid product was filtered, washed by water and recrystallized from 96% ethanol to afford the titled ethyl ester **4a-4s** of 4*H*-pyran-3-carbonitriles.

Some selected compounds are as follows.

*Ethyl 6-amino-5-cyano-2-methyl-4-phenyl-4H-pyran-3-carboxylate (4a)*

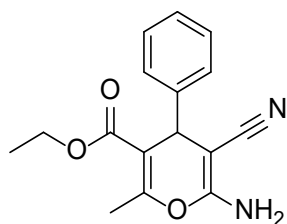

White solids, from **3a** (R = H, 5 mmol, 530 mg, 0.51 mL). Yield: 1.35 g (95%). M.p.: 195–196 °C; refs. [2]: 195–196 °C; [3]: 194–196 °C; [4]:194–196 °C; [5]: 195–196 °C. <sup>1</sup>H NMR (500 MHz, DMSO-*d*<sub>6</sub>), δ (ppm): 7.32 (t, *J* = 7.5 Hz, 2H, H-3 & H-5 phenyl), 7.23 (d, *J* = 7.5 Hz, 1H, H-4'), 7.15 (d, *J* = 7.1 Hz, 2H, H-2 & H-6 phenyl), 6.91 (s, 2H, 6-NH<sub>2</sub>), 4.30 (s, 1H, H-4), 4.01–3.94 (m, 2H, 5-CO<sub>2</sub>CH<sub>2</sub>CH<sub>3</sub>), 2.32 (s, 3H, 2-CH<sub>3</sub>), 1.04 (t, *J* = 7.0 Hz, 3H, 5-CO<sub>2</sub>CH<sub>2</sub>CH<sub>3</sub>).

*Ethyl 6-amino-5-cyano-2-methyl-4-(4-nitrophenyl)-4H-pyran-3-carboxylate (4b)*

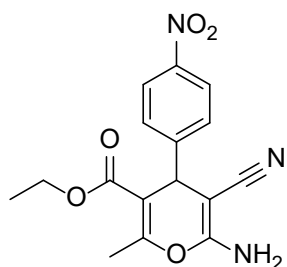

Pale yellow solids, from **3b** (R = 4-NO<sub>2</sub>, 5 mmol, 755 mg). Yield: 1.48 g (90%). M.p.: 180–181 °C; refs. [2]: 182–183 °C; [4]: 180–183 °C; [5]: 180–183 °C. <sup>1</sup>H NMR (500 MHz, DMSO-*d*<sub>6</sub>), δ (ppm): 8.21 (d, *J* = 8.75 Hz, 2H, H-3 & H-5 phenyl), 7.46 (d, *J* = 8.75 Hz, 2H, H-2 & H-6 phenyl), 7.09 (s, 2H, 6-NH<sub>2</sub>), 4.49 (s, 1H, H-4), 4.00–3.94 (m, 2H, 5-CO<sub>2</sub>CH<sub>2</sub>CH<sub>3</sub>),

2.37 (s, 3H, 2-CH<sub>3</sub>), 1.03 (t,  $J= 7.25$  Hz, 3H, 5-CO<sub>2</sub>CH<sub>2</sub>CH<sub>3</sub>).

*Ethyl 6-amino-5-cyano-2-methyl-4-(4-chlorophenyl)-4H-pyran-3-carboxylate (4c)*

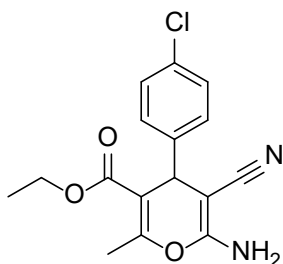

White solids, from **3c** (R = 4-Cl, 5 mmol, 703 mg). Yield: 1.43 g (90%). M.p.: 170–172 °C; refs. [2]: 172–174 °C; [4]: 171–173 °C; [5]: 172–174 °C. <sup>1</sup>H NMR (500 MHz, DMSO-*d*<sub>6</sub>),  $\delta$  (ppm): 7.38 (d,  $J= 8.50$  Hz, 2H, H-3 & H-5 phenyl), 7.18 (d,  $J= 8.50$  Hz, 2H, H-2 & H-6 phenyl), 6.96 (s, 2H, 6-NH<sub>2</sub>), 4.32 (s, 1H, H-4), 4.03–3.92 (m, 2H, 5-CO<sub>2</sub>CH<sub>2</sub>CH<sub>3</sub>), 2.32 (s, 3H, 2-CH<sub>3</sub>), 1.05 (t,  $J= 7.25$  Hz, 3H, 5-CO<sub>2</sub>CH<sub>2</sub>CH<sub>3</sub>).

*Ethyl 6-amino-5-cyano-2-methyl-4-(4-methoxyphenyl)-4H-pyran-3-carboxylate (4j)*

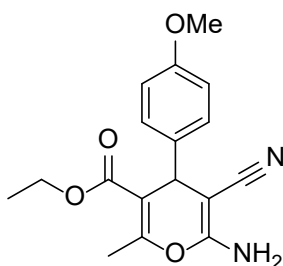

White solids, from **3j** (R = 4-OMe, 5 mmol, 680 mg, 0.61 mL). Yield: 1.38 g (88%). M.p.: 142–142 °C; refs. [2]: 142–144 °C; [3]: 221–222 °C; [4]: 141–143 °C. <sup>1</sup>H NMR (500 MHz, DMSO-*d*<sub>6</sub>),  $\delta$  (ppm): 6.87 (d,  $J= 8.5$  Hz, 2H, H-3 & H-5 phenyl), 7.06 (d,  $J= 8.5$  Hz, 2H, H-2 & H-6 phenyl), 6.86 (s, 2H, 6-NH<sub>2</sub>), 4.25 (s, 1H, H-4), 4.03–3.93 (m, 2H, 5-CO<sub>2</sub>CH<sub>2</sub>CH<sub>3</sub>), 2.29 (s, 3H, 2-CH<sub>3</sub>), 1.07 (t,  $J= 7.0$  Hz, 3H, 5-CO<sub>2</sub>CH<sub>2</sub>CH<sub>3</sub>), 3.73 (s, 3H, 4-OCH<sub>3</sub> phenyl).

## 2. General procedure for synthesis of ethyl 2,7-dimethyl-5-(substituted phenyl)-4-oxo-3,5-dihydro-4H-pyrano[2,3-*d*]pyrimidine-6-carboxylates (5a-5s)



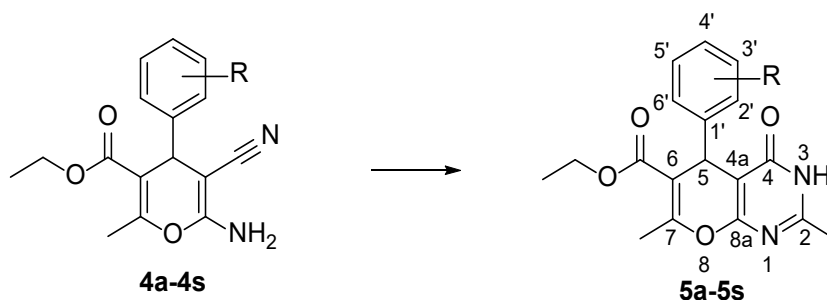

**4a-4s; 5a-5s;**  
 R = H (**a**); 2-NO<sub>2</sub> (**b**); 4-Cl (**c**); 4-Cl-3-NO<sub>2</sub> (**d**); 2-Cl-4-Me (**e**); 2-Cl-4-OMe (**f**);  
 3-OH-4-OMe (**g**); 4-Br (**h**); 4-OH (**i**); 4-OMe (**j**); 4-OH-3-OMe (**k**);  
 2,4-diOMe (**l**); 2,3-diOH (**m**); 2,4-diOH (**n**); 3,4-diOMe (**o**);  
 2,5-diOMe (**p**); 2,6-diOMe (**q**); 4-NMe<sub>2</sub> (**s**).

**Scheme 2S.** Synthesis of 4*H*-pyrano[2,3-*d*]pyrimidines **5a-5s**.

Reaction mixture of corresponding 4*H*-pyrans **4a-4s** (1 mmol), anhydride acetic (1.25 mL), and trifluoroacetic acid (0.025 mL) was heated under reflux at 100 °C for 15 min, then cooled to room temperature and left overnight (24 h). Upon completion, as monitored using TLC plates, the mixture was poured into cold water (10 mL). The crude product of 4*H*-pyrano[2,3-*d*]pyrimidine **5a-5s** was filtered, washed by water (3×2.5 mL), crystallized from 96% ethanol to afford compound **5a-5s**.

*Ethyl 2,7-dimethyl-5-phenyl-4-oxo-3,5-dihydro-4H-pyrano[2,3-d]pyrimidine-6-carboxylate (5a)*

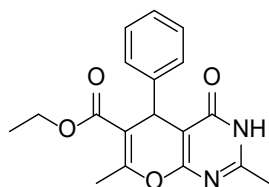

White solids, from **4a** (R = H, 2 mmol, 568 mg). Yield: 587 mg (90.3%). M.p.: 237–239 °C. Ref. [6, 7]: no physical and spectral data; [1]: 237–239 °C. <sup>1</sup>H NMR (500 MHz, DMSO-*d*<sub>6</sub>), δ (ppm): 12.49 (s, 1H, 3-NH), 7.26 (t, *J* = 7.5 Hz, 2H, H-3 & H-5 phenyl), 7.22 (d, *J* = 1.5 Hz, 2H, H-2 & H-6 phenyl), 7.18–7.15 (m, 1H, H-4'), 4.79 (s, 1H, H-5), 4.05–4.01 (m, 2H, 5-CO<sub>2</sub>CH<sub>2</sub>CH<sub>3</sub>), 2.40 (s, 3H, 2-CH<sub>3</sub>), 2.25 (s, 3H, 7-CH<sub>3</sub>), 1.12 (t, *J* = 7.5 Hz, 3H, 5-CO<sub>2</sub>CH<sub>2</sub>CH<sub>3</sub>). <sup>13</sup>C NMR (125 MHz, DMSO-*d*<sub>6</sub>), δ (ppm): 166.1 (C=O ester), 162.4, 160.4, 159.1, 158.2, 144.5, 128.5, 128.4, 127.1, 108.4, 101.1, 60.7 (OCH<sub>2</sub>CH<sub>3</sub>), 36.3 (C-5), 21.5 (2-CH<sub>3</sub>), 18.8 (7-CH<sub>3</sub>), 14.3 (OCH<sub>2</sub>CH<sub>3</sub>).

*Ethyl 2,7-dimethyl-5-(4-nitrophenyl)-4-oxo-3,5-dihydro-4H-pyrano[2,3-d]pyrimidine-6-carboxylate (5b)*

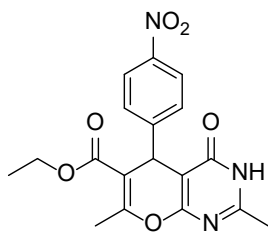

Ivory solids, from **4b** (R = 4-NO<sub>2</sub>, 2 mmol, 658 mg). Yield: 683 mg (92.2%). M.p.: 220–222 °C. <sup>1</sup>H NMR (500 MHz, DMSO-*d*<sub>6</sub>), δ (ppm): 12.55 (s, 1H, 3-NH), 8.12 (t, *J* = 8.5 Hz, 2H, H-3 & H-5 phenyl), 7.50 (d, *J* = 8.5 Hz, 2H, H-2 & H-6 phenyl), 4.90 (s, 1H, H-5), 4.01 (q, *J* = 7.25 Hz, 2H, 5-CO<sub>2</sub>CH<sub>2</sub>CH<sub>3</sub>), 2.42 (s, 3H, 2-CH<sub>3</sub>), 2.25 (s, 3H, 7-CH<sub>3</sub>), 1.09 (t, *J* = 7.25 Hz, 3H, 5-CO<sub>2</sub>CH<sub>2</sub>CH<sub>3</sub>). <sup>13</sup>C NMR (125 MHz, DMSO-*d*<sub>6</sub>), δ (ppm): 165.2 (C=O ester), 161.8, 159.9, 159.3, 159.3, 151.5, 146.2, 129.4, 123.3, 106.6, 99.5, 60.3 (OCH<sub>2</sub>CH<sub>3</sub>), 36.2 (C-5), 20.9 (2-CH<sub>3</sub>), 18.5 (7-CH<sub>3</sub>), 13.8 (OCH<sub>2</sub>CH<sub>3</sub>).

*Ethyl 2,7-dimethyl-5-(4-chlorophenyl)-4-oxo-3,5-dihydro-4H-pyrano[2,3-d]pyrimidine-6-carboxylate (5c)*

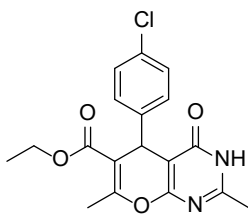

White solids, from **4c** (R = 4-Cl, 2 mmol, 637 mg). Yield: 668 mg (92.5%). M.p.: 235–237 °C. <sup>1</sup>H NMR (500 MHz, DMSO-*d*<sub>6</sub>), δ (ppm): 12.25 (s, 1H, 3-NH), 7.33 (d, *J* = 8.25 Hz, 2H, H-3 & H-5 phenyl), 7.23 (d, *J* = 8.25 Hz, 2H, H-2 & H-6 phenyl), 6.77 (s, 1H, H-5), 4.05 (q, *J* = 7.0 Hz, 2H, 6-CO<sub>2</sub>CH<sub>2</sub>CH<sub>3</sub>), 2.40 (s, 3H, 2-CH<sub>3</sub>), 2.30 (s, 3H, 7-CH<sub>3</sub>), 1.14 (t, *J* = 7.0 Hz, 3H, 6-CO<sub>2</sub>CH<sub>2</sub>CH<sub>3</sub>). <sup>13</sup>C NMR (125 MHz, DMSO-*d*<sub>6</sub>), δ (ppm): 165.9 (C=O ester), 162.4, 160.3, 159.8, 159.0, 143.5, 131.7, 130.4, 128.5, 107.8, 100.6, 60.7 (6-CO<sub>2</sub>CH<sub>2</sub>CH<sub>3</sub>), 36.0 (C-5), 21.4 (2-CH<sub>3</sub>), 18.9 (7-CH<sub>3</sub>), 14.3 (6-CO<sub>2</sub>CH<sub>2</sub>CH<sub>3</sub>).

*Ethyl 2,7-dimethyl-5-(4-chloro-3-nitrophenyl)-4-oxo-3,5-dihydro-4H-pyrano[2,3-d]pyrimidine-6-carboxylate (5d)*

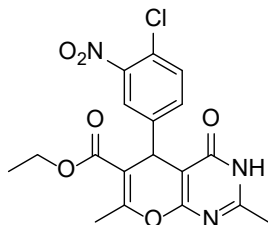

White solids, from **4d** (R = 4-Cl-3-NO<sub>2</sub>, 2 mmol, 727 mg). Yield: 729 mg (89%). M.p.: 225–227 °C. <sup>1</sup>H NMR (500 MHz, DMSO-*d*<sub>6</sub>), δ (ppm): 12.25 (s, 1H, 3-NH), 8.16 (s, 1H, H-2 phenyl), 7.67 (d, *J* = 7.75 Hz, 1H, H-5 phenyl), 7.52 (d, *J* = 7.75 Hz, 1H, H-6 phenyl), 6.42 (s, 1H, H-5), 4.05 (q, *J* = 7.0 Hz, 2H, 6-CO<sub>2</sub>CH<sub>2</sub>CH<sub>3</sub>), 2.40 (s, 3H, 2-CH<sub>3</sub>), 2.30 (s, 3H, 7-CH<sub>3</sub>),

1.14 (t,  $J = 7.0$  Hz, 3H, CO<sub>2</sub>CH<sub>2</sub>CH<sub>3</sub>).

*Ethyl 2,7-dimethyl-5-(2-chloro-4-methylphenyl)-4-oxo-3,5-dihydro-4H-pyrano[2,3-d]pyrimidine-6-carboxylate (5e)*

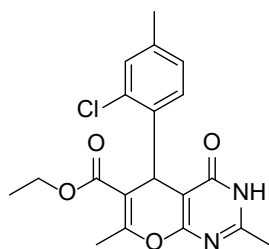

White solids, from **4e** (R = 2-Cl-4-Me, 2 mmol, 665 mg). Yield: 673 mg (90.2%). M.p.: 236–238 °C. <sup>1</sup>H NMR (500 MHz, DMSO-*d*<sub>6</sub>),  $\delta$  (ppm): 12.25 (s, 1H, 3-NH), 7.41 (s, 1H, H-3 phenyl), 7.28 (d,  $J = 8.5$  Hz, 1H, H-5 phenyl), 7.09 (d,  $J = 8.5$  Hz, 1H, H-6 phenyl), 6.15 (s, 1H, H-5), 4.05 (q,  $J = 7.0$  Hz, 2H, 6-CO<sub>2</sub>CH<sub>2</sub>CH<sub>3</sub>), 2.40 (s, 3H, 2-CH<sub>3</sub>), 2.30 (s, 3H, 7-CH<sub>3</sub>), 1.14 (t,  $J = 7.0$  Hz, 3H, CO<sub>2</sub>CH<sub>2</sub>CH<sub>3</sub>).

*Ethyl 2,7-dimethyl-5-(2-chloro-4-methoxyphenyl)-4-oxo-3,5-dihydro-4H-pyrano[2,3-d]pyrimidine-6-carboxylate (5f)*

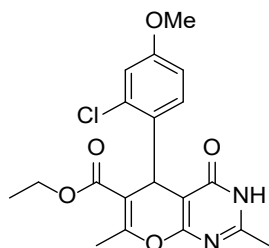

White solids, from **4f** (R = 2-Cl-4-OMe, 2 mmol, 697 mg). Yield: 688 mg (88.2%). M.p.: 223–225 °C. <sup>1</sup>H NMR (500 MHz, DMSO-*d*<sub>6</sub>),  $\delta$  (ppm): 12.25 (s, 1H, 3-NH), 7.27 (d,  $J = 9.0$  Hz, 1H, H-6 phenyl), 7.04 (s, 1H, H-3 phenyl), 6.40 (dd,  $J = 1.5, 8.5$  Hz, 1H, H-5 phenyl), 6.15 (s, 1H, H-5), 4.05 (q,  $J = 7.0$  Hz, 2H, 6-CO<sub>2</sub>CH<sub>2</sub>CH<sub>3</sub>), 3.79 (s, 3H, 4-OCH<sub>3</sub> phenyl), 2.40 (s, 3H, 2-CH<sub>3</sub>), 2.30 (s, 3H, 7-CH<sub>3</sub>), 1.14 (t,  $J = 7.0$  Hz, 3H, CO<sub>2</sub>CH<sub>2</sub>CH<sub>3</sub>).

*Ethyl 2,7-dimethyl-5-(5-chloro-2-hydroxy-3-nitrophenyl)-4-oxo-3,5-dihydro-4H-pyrano[2,3-d]pyrimidine-6-carboxylate (5g)*

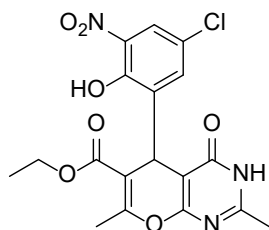

White solids, from **4f** (R = 5-Cl-2-OH-3-NO<sub>2</sub>, 2 mmol, 759 mg). Yield: 734 mg (87.1%). M.p.: 225–227 °C. <sup>1</sup>H NMR (500 MHz, DMSO-*d*<sub>6</sub>),  $\delta$  (ppm): 12.25 (s, 1H, 3-NH), 11.77 (s, 1H, 2-OH phenyl), 7.02 (s, 1H, H-4 phenyl), 7.51 (s, 1H, H-6 phenyl), 6.39 (s, 1H, H-5), 4.05 (q,  $J = 7.0$  Hz, 2H, 6-CO<sub>2</sub>CH<sub>2</sub>CH<sub>3</sub>), 3.79 (s, 3H, 4-OCH<sub>3</sub> phenyl), 2.40 (s, 3H, 2-CH<sub>3</sub>), 2.31 (s, 3H, 7-CH<sub>3</sub>), 1.14 (t,  $J = 7.0$  Hz, 3H, CO<sub>2</sub>CH<sub>2</sub>CH<sub>3</sub>).

Ethyl 2,7-dimethyl-5-(4-bromophenyl)-4-oxo-3,5-dihydro-4H-pyrano[2,3-d]pyrimidine-6-carboxylate (**5h**)

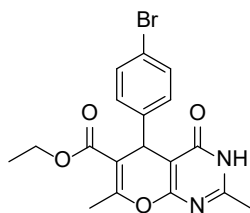

White solids, from **4h** (R = 4-Br, 2 mmol, 726 mg). Yield: 747 mg (92.5%). M.p.: 263–265 °C. <sup>1</sup>H NMR (500 MHz, DMSO-*d*<sub>6</sub>), δ (ppm): 12.25 (s, 1H, 3-NH), 7.54 (d, *J* = 8.5 Hz, 2H, H-3 & H-5 phenyl), 7.31 (d, *J* = 8.5 Hz, 2H, H-2 & H-6 phenyl), 6.15 (s, 1H, H-5), 4.05 (q, *J* = 7.0 Hz, 2H, 6-CO<sub>2</sub>CH<sub>2</sub>CH<sub>3</sub>), 2.40 (s, 3H, 2-CH<sub>3</sub>), 2.30 (s, 3H, 7-CH<sub>3</sub>), 1.12 (t, *J* = 7.0 Hz, 3H, 5-CO<sub>2</sub>CH<sub>2</sub>CH<sub>3</sub>). <sup>13</sup>C NMR (125 MHz, DMSO-*d*<sub>6</sub>), δ (ppm): 165.4, 161.9, 159.8, 158.8, 158.5, 143.4, 130.9, 130.3, 119.7, 107.3, 100.1, 60.2 (6-CO<sub>2</sub>CH<sub>2</sub>CH<sub>3</sub>), 35.6 (C-5), 20.9 (2-CH<sub>3</sub>), 18.4 (7-CH<sub>3</sub>), 13.8 (6-CO<sub>2</sub>CH<sub>2</sub>CH<sub>3</sub>).

Ethyl 2,7-dimethyl-5-(4-hydroxyphenyl)-4-oxo-3,5-dihydro-4H-pyrano[2,3-d]pyrimidine-6-carboxylate (**5i**)

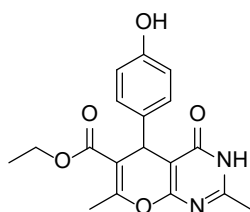

White solids, from **4i** (R = 4-OH, 2 mmol, 600 mg). Yield: 600 mg (87.7%). M.p.: 251–253 °C. <sup>1</sup>H NMR (500 MHz, DMSO-*d*<sub>6</sub>), δ (ppm): 12.25 (s, 1H, 3-NH), 8.36 (s, 1H, 4'-OH), 7.04 (d, *J* = 8.0 Hz, 2H, H-2 & H-6 phenyl), 6.64 (d, *J* = 8.0 Hz, 2H, H-3 & H-5 phenyl), 6.15 (s, 1H, H-5), 4.04 (q, *J* = 7.0 Hz, 2H, 6-CO<sub>2</sub>CH<sub>2</sub>CH<sub>3</sub>), 2.40 (s, 3H, 2-CH<sub>3</sub>), 2.30 (s, 3H, 7-CH<sub>3</sub>), 1.14 (t, *J* = 7.0 Hz, 3H, 6-CO<sub>2</sub>CH<sub>2</sub>CH<sub>3</sub>). <sup>13</sup>C NMR (125 MHz, DMSO-*d*<sub>6</sub>), δ (ppm): 166.8 (C=O ester), 162.8, 159.4, 158.8, 157.5, 155.7, 136.7, 129.1, 114.4, 108.9, 97.9, 60.2 (6-CO<sub>2</sub>CH<sub>2</sub>CH<sub>3</sub>), 36.3 (C-5), 20.5 (2-CH<sub>3</sub>), 19.5 (7-CH<sub>3</sub>), 14.3 (6-CO<sub>2</sub>CH<sub>2</sub>CH<sub>3</sub>).

Ethyl 2,7-dimethyl-5-(4-methoxyphenyl)-4-oxo-3,5-dihydro-4H-pyrano[2,3-d]pyrimidine-6-carboxylate (**5j**)

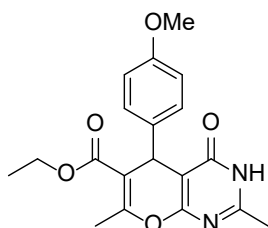

White solids, from **4j** (R = 4-OMe, 2 mmol, 628 mg). Yield: 648 mg (91.1%). M.p.:

224–226 °C. Ref. [8]: no physical and spectral data. <sup>1</sup>H NMR (500 MHz, DMSO-*d*<sub>6</sub>), δ (ppm): 12.25 (s, 1H, 3-NH), 7.16 (d, *J* = 8.5 Hz, 2H, H-3 & H-5 phenyl), 6.87 (d, *J* = 8.5 Hz, 2H, H-2 & H-6 phenyl), 6.15 (s, 1H, H-5), 4.03 (q, *J* = 7.0 Hz, 2H, 6-CO<sub>2</sub>CH<sub>2</sub>CH<sub>3</sub>), 3.78 (s, 3H, 4-OCH<sub>3</sub> phenyl), 2.39 (s, 3H, 2-CH<sub>3</sub>), 2.29 (s, 3H, 7-CH<sub>3</sub>), 1.14 (t, *J* = 7.0 Hz, 3H, 6-CO<sub>2</sub>CH<sub>2</sub>CH<sub>3</sub>). <sup>13</sup>C NMR (125 MHz, DMSO-*d*<sub>6</sub>), δ (ppm): 166.2 (C=O ester), 162.4, 160.3, 158.9, 158.4, 158.2, 136.7, 129.4, 113.9, 108.6, 101.3, 60.6 (6-CO<sub>2</sub>CH<sub>2</sub>CH<sub>3</sub>), 55.5 (4-OCH<sub>3</sub> phenyl), 35.5 (C-5), 21.4 (2-CH<sub>3</sub>), 18.8 (7-CH<sub>3</sub>), 14.4 (6-CO<sub>2</sub>CH<sub>2</sub>CH<sub>3</sub>).

*Ethyl 2,7-dimethyl-5-(4-hydroxy-3-methoxyphenyl)-4-oxo-3,5-dihydro-4H-pyrano[2,3-d]pyrimidine-6-carboxylate (5k)*

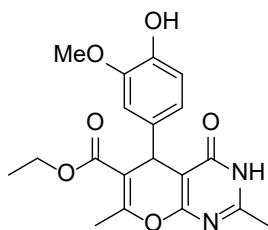

White solids, from **4k** (R = 4-OH-3-OMe, 2 mmol, 667 mg). Yield: 663 mg (90.2%). M.p.: 276–278 °C. <sup>1</sup>H NMR (500 MHz, DMSO-*d*<sub>6</sub>), δ (ppm): 12.25 (s, 1H, 3-NH), 7.76 (s, 1H, 4-OH phenyl), 6.85–6.81 (m, 2H, H-5 & H-6 phenyl), 6.71 (s, 1H, H-2 phenyl), 6.14 (s, 1H, H-5), 4.05 (q, *J* = 7.25 Hz, 2H, 6-CO<sub>2</sub>CH<sub>2</sub>CH<sub>3</sub>), 3.78 (s, 3H, 3'-OCH<sub>3</sub>), 2.40 (s, 3H, 2-CH<sub>3</sub>), 2.30 (s, 3H, 7-CH<sub>3</sub>), 1.14 (t, *J* = 7.25 Hz, 3H, 6-CO<sub>2</sub>CH<sub>2</sub>CH<sub>3</sub>).

*Ethyl 2,7-dimethyl-5-(3-hydroxy-4-methoxyphenyl)-4-oxo-3,5-dihydro-4H-pyrano[2,3-d]pyrimidine-6-carboxylate (5l)*

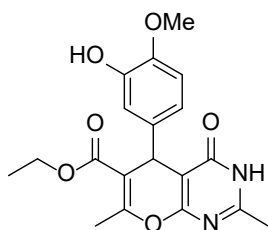

White solids, from **4l** (R = 3-OH-4-OMe, 2 mmol, 660 mg). Yield: 667 mg (89.5%); M.p.: 248–249 °C. <sup>1</sup>H NMR (500 MHz, DMSO-*d*<sub>6</sub>), δ (ppm): 12.25 (s, 1H, 3-NH), 6.91 (s, 3-OH phenyl), 6.89 (d, *J* = 8.5 Hz, 1H, H-5 phenyl), 6.81 (d, *J* = 8.5 Hz, 1H, H-6 phenyl), 6.07 (s, 1H, H-5), 4.03 (q, *J* = 7.25 Hz, 2H, 6-CO<sub>2</sub>CH<sub>2</sub>CH<sub>3</sub>), 3.82 (s, 3H, 4-OCH<sub>3</sub> phenyl), 2.40 (s, 3H, 2-CH<sub>3</sub>), 2.29 (s, 3H, 7-CH<sub>3</sub>), 1.14 (t, *J* = 7.25 Hz, 3H, 6-CO<sub>2</sub>CH<sub>2</sub>CH<sub>3</sub>).

*Ethyl 2,7-dimethyl-5-(2,3-dihydroxyphenyl)-4-oxo-3,5-dihydro-4H-pyrano[2,3-d]pyrimidine-6-carboxylate (5m)*

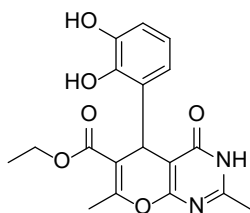

White solids, from **4m** (R = 2,3-diOH, 2 mmol, 632 mg). Yield: 634 mg (88.6%); M.p.: 245–247 °C. <sup>1</sup>H NMR (500 MHz, DMSO-*d*<sub>6</sub>), δ (ppm): 12.47 (s, 1H, 3-NH), 8.40 (s, 1H, 3-OH phenyl), 7.76 (s, 1H, 2-OH phenyl), 6.92–6.87 (m, 2H, H-5 & H-6 phenyl), 5.98 (s, 1H, H-5), 5.76–5.74 (m, 1H, H-4 phenyl), 4.03 (q, *J* = 7.0 Hz, 2H, COOCH<sub>2</sub>CH<sub>3</sub>), 3.70 (s, 3H, 4-OCH<sub>3</sub> phenyl), 2.40 (s, 3H, 2-CH<sub>3</sub>), 2.30 (s, 3H, 7-CH<sub>3</sub>), 1.14 (t, *J* = 7.0 Hz, 3H, 5-CO<sub>2</sub>CH<sub>2</sub>CH<sub>3</sub>).

*Ethyl 2,7-dimethyl-5-(2,4-dihydroxyphenyl)-4-oxo-3,5-dihydro-4H-pyrano[2,3-d]pyrimidine-6-carboxylate (5n)*

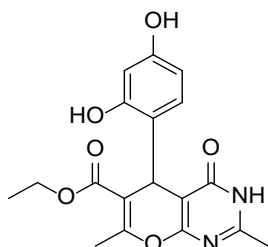

White solids, from **4n** (R = 2,4-diOH, 2 mmol, 632 mg). Yield: 639 mg (89.3%); M.p.: 250–252 °C. <sup>1</sup>H NMR (500 MHz, DMSO-*d*<sub>6</sub>), δ (ppm): 12.54 (s, 1H, 3-NH), 8.33 (s, 1H, 2-OH phenyl), 7.91 (s, 1H, 4-OH phenyl), 7.14 (d, *J* = 8.5 Hz, 1H, H-6 phenyl), 6.45 (dd, *J* = 2.0, 8.5 Hz, 1H, H-5 phenyl), 6.35 (d, *J* = 2.0 Hz, 1H, H-3 phenyl), 6.11 (s, 1H, H-5), 5.76–5.74 (m, 1H, H-4 phenyl), 4.03 (q, *J* = 7.0 Hz, 2H, COOCH<sub>2</sub>CH<sub>3</sub>), 2.40 (s, 3H, 2-CH<sub>3</sub>), 2.29 (s, 3H, 7-CH<sub>3</sub>), 1.14 (t, *J* = 7.0 Hz, 3H, 5-CO<sub>2</sub>CH<sub>2</sub>CH<sub>3</sub>).

*Ethyl 2,7-dimethyl-5-(3,4-dimethoxyphenyl)-4-oxo-3,5-dihydro-4H-pyrano[2,3-d]pyrimidine-6-carboxylate (5o)*

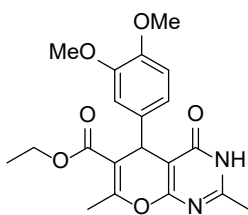

White solids, from **4o** (R = 3,4-diOMe, 2 mmol, 688 mg). Yield: 704 mg (91.2%). M.p.: 265–267 °C. <sup>1</sup>H NMR (500 MHz, DMSO-*d*<sub>6</sub>), δ (ppm): 12.25 (s, 1H, 3-NH), 6.93–6.89 (m, 2H, H-2 & H-3 phenyl), 6.81 (s, 1H, H-6 phenyl), 6.14 (s, 1H, H-5), 4.03 (q, *J* = 7.0 Hz, 2H, COOCH<sub>2</sub>CH<sub>3</sub>), 3.80 (s, 3H, 3-OCH<sub>3</sub>), 3.74 (s, 3H, 4-OCH<sub>3</sub>), 2.40 (s, 3H, 2-CH<sub>3</sub>), 2.30 (s, 3H, 7-CH<sub>3</sub>), 1.14 (t, *J* = 7.0 Hz, 3H, 5-CO<sub>2</sub>CH<sub>2</sub>CH<sub>3</sub>).

*Ethyl 2,7-dimethyl-5-(2,4-dimethoxyphenyl)-4-oxo-3,5-dihydro-4H-pyrano[2,3-d]pyrimidine-6-carboxylate (5p)*

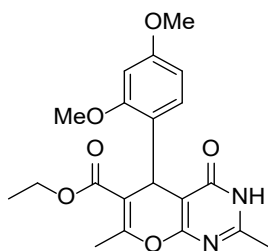

White solids, from **4p** (R = 2,4-diOMe, 2 mmol, 688 mg). Yield: mg 689 (89.3%); M.p.: 246–248 °C. <sup>1</sup>H NMR (500 MHz, DMSO-*d*<sub>6</sub>), δ (ppm): 12.25 (s, 1H, 3-NH), 6.93 (d, *J* = 8.5 Hz, 1H, H-6 phenyl), 6.57 (s, 1H, H-3 phenyl), 6.44 (d, *J* = 8.5 Hz, 1H, H-5 phenyl), 6.14 (s, 1H, H-5), 4.03 (q, *J* = 7.0 Hz, 2H, COOCH<sub>2</sub>CH<sub>3</sub>), 3.83 (s, 3H, 2-OCH<sub>3</sub>), 3.79 (s, 3H, 4-OCH<sub>3</sub>), 2.40 (s, 3H, 2-CH<sub>3</sub>), 2.30 (s, 3H, 7-CH<sub>3</sub>), 1.14 (t, *J* = 7.0 Hz, 3H, 5-CO<sub>2</sub>CH<sub>2</sub>CH<sub>3</sub>).

*Ethyl 2,7-dimethyl-5-(2,5-dimethoxyphenyl)-4-oxo-3,5-dihydro-4H-pyrano[2,3-d]pyrimidine-6-carboxylate (5q)*

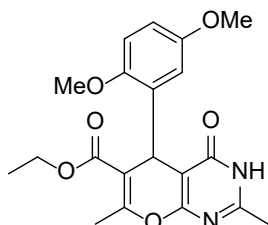

White solids, from **4q** (R = 2,5-diOMe, 2 mmol, 688 mg). Yield: mg 691 (89.5%); M.p.: 239–240 °C. <sup>1</sup>H NMR (500 MHz, DMSO-*d*<sub>6</sub>), δ (ppm): 12.25 (s, 1H, 3-NH), 6.95 (s, 1H, H-6 phenyl), 6.94 (d, *J* = 8.5 Hz, 1H, H-3 phenyl), 6.81 (d, *J* = 8.5 Hz, 1H, H-4 phenyl), 6.08 (s, 1H, H-5), 4.03 (q, *J* = 7.0 Hz, 2H, COOCH<sub>2</sub>CH<sub>3</sub>), 3.82 (s, 3H, 2-OCH<sub>3</sub>), 3.78 (s, 3H, 5-OCH<sub>3</sub>), 2.40 (s, 3H, 2-CH<sub>3</sub>), 2.30 (s, 3H, 7-CH<sub>3</sub>), 1.14 (t, *J* = 7.0 Hz, 3H, 5-CO<sub>2</sub>CH<sub>2</sub>CH<sub>3</sub>).

*Ethyl 2,7-dimethyl-5-(2,6-dimethoxyphenyl)-4-oxo-3,5-dihydro-4H-pyrano[2,3-d]pyrimidine-6-carboxylate (5r)*

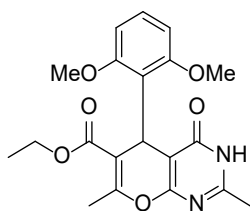

White solids, from **4r** (R = 2,6-diOMe, 2 mmol, 688 mg). Yield: 696 mg (90.1%); M.p.: 253–255 °C. <sup>1</sup>H NMR (500 MHz, DMSO-*d*<sub>6</sub>), δ (ppm): 12.25 (s, 1H, 3-NH), 7.22 (t, *J* = 8.5 Hz, 1H, H-4 phenyl), 6.50 (d, *J* = 8.5 Hz, 2H, H-3 & H-5 phenyl), 6.20 (s, 1H, H-5), 4.03 (q, *J* = 7.0 Hz, 2H, COOCH<sub>2</sub>CH<sub>3</sub>), 3.83 (s, 6H, 2-OCH<sub>3</sub> & 6-OCH<sub>3</sub> phenyl), 2.40 (s, 3H, 2-CH<sub>3</sub>), 2.30 (s, 3H, 7-CH<sub>3</sub>), 1.14 (t, *J* = 7.0 Hz, 3H, 5-CO<sub>2</sub>CH<sub>2</sub>CH<sub>3</sub>).

*Ethyl 2,7-dimethyl-5-(4-dimethylaminophenyl)-4-oxo-3,5-dihydro-4H-pyrano[2,3-d]pyrimidine-6-carboxylate (5s)*

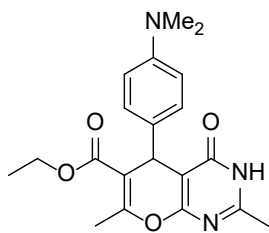

White solids, from **4p** (R = 4-NMe<sub>2</sub>, 2 mmol, 654 mg). Yield: 664 mg (90.2%). M.p.: 244–246 °C. <sup>1</sup>H NMR (500 MHz, DMSO-*d*<sub>6</sub>), δ (ppm): 12.53 (s, 1H, 3-NH), 7.07 (d, *J* = 8.5 Hz, 2H, H-2 & H-6 phenyl), 6.60 (d, *J* = 8.5 Hz, 2H, H-3 & H-5 phenyl), 6.15 (s, 1H, H-5), 4.05 (q, *J* = 7.0 Hz, 2H, 5-CO<sub>2</sub>CH<sub>2</sub>CH<sub>3</sub>), 2.98 [4'-N(CH<sub>3</sub>)<sub>2</sub>], 2.40 (s, 3H, 2-CH<sub>3</sub>), 2.25 (s, 3H, 7-CH<sub>3</sub>), 1.12 (t, *J* = 7.0 Hz, 3H, 5-CO<sub>2</sub>CH<sub>2</sub>CH<sub>3</sub>). <sup>13</sup>C NMR (125 MHz, DMSO-*d*<sub>6</sub>), δ (ppm): 166.8 (C=O ester), 162.8, 159.3, 158.8, 157.5, 149.5, 135.7, 128.6, 112.3, 108.9, 97.9, 60.2 (OCH<sub>2</sub>CH<sub>3</sub>), 40.3 [4'-N(CH<sub>3</sub>)<sub>2</sub>], 35.5 (C-5), 20.5 (2-CH<sub>3</sub>), 19.5 (7-CH<sub>3</sub>), 14.3 (OCH<sub>2</sub>CH<sub>3</sub>).

### 3. Physical and spectral data of ethyl 2,7-dimethyl-5-(substituted phenyl)-4-oxo-3-propargyl-3,5-dihydro-4H-pyrano[2,3-*d*]pyrimidine-6-carboxylates (**6a-6p**)

*Ethyl 2,7-dimethyl-5-phenyl-4-oxo-3-propargyl-3,5-dihydro-4H-pyrano[2,3-*d*]pyrimidine-6-carboxylate (6a)*

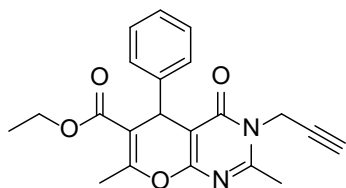

White solids, from **5a** (R = H, 1 mmol, 326 mg). Yield: 348 mg (95.7%). M.p.: 131–132 °C; ref. [7]: no physical and spectral data; ref. [8]: 131–133 °C. <sup>1</sup>H NMR (500 MHz, DMSO-*d*<sub>6</sub>), δ (ppm): 7.29–7.25 (m, 2H, H-3 & H-5 phenyl), 7.23 (d, *J* = 6.8 Hz, 2H, H-2 & H-6 phenyl), 7.16 (dd, *J* = 4.25, 9.75 Hz, 1H, H-4 phenyl), 4.83–4.72 (m, 1H, N-CH<sub>2</sub>C≡CH), 4.82 (s, 1H, H-5), 4.03 (qd, *J* = 7.0, 2.2 Hz, 2H, 6-CO<sub>2</sub>CH<sub>2</sub>CH<sub>3</sub>), 3.34 (s, 1H, N-CH<sub>2</sub>C≡CH), 2.58 (s, 3H, 2-CH<sub>3</sub>), 2.42 (s, 3H, 7-CH<sub>3</sub>), 1.11 (t, *J* = 7.1 Hz, 3H, 6-CO<sub>2</sub>CH<sub>2</sub>CH<sub>3</sub>). <sup>13</sup>C NMR (125 MHz, DMSO-*d*<sub>6</sub>), δ (ppm): 166.0 (C=O ester), 160.7, 159.7, 158.7, 158.5, 144.2, 128.6, 128.6, 127.2, 108.4, 100.7, 78.2 (N-CH<sub>2</sub>C≡CH), 75.6 (N-CH<sub>2</sub>C≡CH), 60.7 (6-CO<sub>2</sub>CH<sub>2</sub>CH<sub>3</sub>), 37.1 (C-5), 33.4 (N-CH<sub>2</sub>C≡CH), 22.6 (2-CH<sub>3</sub>), 18.8 (7-CH<sub>3</sub>), 14.3 (6-CO<sub>2</sub>CH<sub>2</sub>CH<sub>3</sub>). ESI-HRMS(+): C<sub>21</sub>H<sub>20</sub>N<sub>2</sub>O<sub>4</sub>, calc. for M+H = 365.1496 Da, M+Na = 387.1315 Da; found: *m/z* 365.1485 [M+H]<sup>+</sup>; 387.1342 [M+Na]<sup>+</sup>.

*Ethyl 2,7-dimethyl-5-(4-nitrophenyl)-4-oxo-3-propargyl-3,5-dihydro-4H-pyrano[2,3-*d*]pyrimidine-6-carboxylate (6b)*



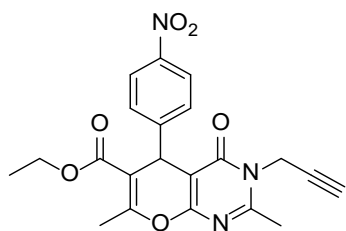

Ivory solids, from **5b** (R = 4-NO<sub>2</sub>, 1 mmol, 371 mg). Yield: 370 mg (90.5%). M.p.: 191–193 °C; ref. [8]: no physical and spectral data. <sup>1</sup>H NMR (500 MHz, DMSO-*d*<sub>6</sub>), δ (ppm): 8.08 (d, *J* = 8.0 Hz, 2H, H-3 & H-5 phenyl), 7.52 (d, *J* = 8.0 Hz, 2H, H-2 & H-6 phenyl), 6.13 (s, 1H, H-5), 5.15 (d, *J* = 2.0 Hz, 2H, N-CH<sub>2</sub>C≡CH), 4.03 (q, *J* = 7.25 Hz, 2H, 6-CO<sub>2</sub>CH<sub>2</sub>CH<sub>3</sub>), 2.83 (s, 1H, N-CH<sub>2</sub>C≡CH), 2.65 (s, 3H, 2-CH<sub>3</sub>), 2.30 (s, 3H, 7-CH<sub>3</sub>), 1.14 (m, 3H, 6-CO<sub>2</sub>CH<sub>2</sub>CH<sub>3</sub>). <sup>13</sup>C NMR (125 MHz, DMSO-*d*<sub>6</sub>), δ (ppm): 166.9 (C=O ester), 161.8, 159.4, 158.7, 158.2, 147.5, 146.5, 128.4, 123.6, 108.8, 98.5, 78.0 (N-CH<sub>2</sub>C≡CH), 72.7 (N-CH<sub>2</sub>C≡CH), 60.2 (6-CO<sub>2</sub>CH<sub>2</sub>CH<sub>3</sub>), 38.1 (C-5), 33.2 (N-CH<sub>2</sub>C≡CH), 20.8 (2-CH<sub>3</sub>), 19.5 (7-CH<sub>3</sub>), 14.3 (6-CO<sub>2</sub>CH<sub>2</sub>CH<sub>3</sub>). ESI-HRMS(+): C<sub>21</sub>H<sub>19</sub>N<sub>3</sub>O<sub>6</sub>, calc. for M+H = 410.1347 Da, M+Na = 432.1166 Da; found: *m/z* 410.1368 [M+H]<sup>+</sup>; 432.1189 [M+Na]<sup>+</sup>.

*Ethyl 2,7-dimethyl-5-(4-chlorophenyl)-4-oxo-3-propargyl-3,5-dihydro-4H-pyrano[2,3-d]pyrimidine-6-carboxylate (6c)*

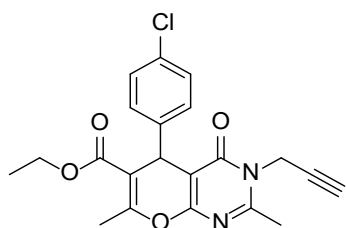

Ivory solids, from **5c** (R = 4-Cl, 1 mmol, 361 mg). Yield: 357 mg (89.5%). M.p.: 165–167 °C; ref. [8]: no physical and spectral data. <sup>1</sup>H NMR (500 MHz, DMSO-*d*<sub>6</sub>), δ (ppm): 7.33 (d, *J* = 8.4 Hz, 2H, H-3 & H-5 phenyl), 7.25 (d, *J* = 8.4 Hz, 2H, H-2 & H-6 phenyl), 4.82 (dd, *J* = 18.0, 2.5 Hz, 1H, N-CH<sub>2</sub><sup>(a)</sup>C≡CH), 4.80 (s, 1H, H-5), 4.71 (dd, *J* = 18.0, 2.5 Hz, 1H, N-CH<sub>2</sub><sup>(b)</sup>C≡CH), 4.92–4.77 (m, 2H, N-CH<sub>2</sub>C≡CH), 4.03 (dt, *J* = 12.7, 6.3 Hz, 2H, 6-CO<sub>2</sub>CH<sub>2</sub>CH<sub>3</sub>), 3.34 (s, 1H, N-CH<sub>2</sub>C≡CH), 2.58 (s, 3H, 2-CH<sub>3</sub>), 2.42 (s, 3H, 7-CH<sub>3</sub>), 1.11 (t, *J* = 7.1 Hz, 3H, 6-CO<sub>2</sub>CH<sub>2</sub>CH<sub>3</sub>). <sup>13</sup>C NMR (125 MHz, DMSO-*d*<sub>6</sub>), δ (ppm): 165.8 (C=O ester), 160.7, 159.9, 158.9, 158.7, 143.2, 131.8, 130.5, 128.6, 107.9, 100.3, 78.1 (N-CH<sub>2</sub>C≡CH), 75.6 (N-CH<sub>2</sub>C≡CH), 60.8 (6-CO<sub>2</sub>CH<sub>2</sub>CH<sub>3</sub>), 36.7 (C-5), 33.4 (N-CH<sub>2</sub>C≡CH), 22.6 (2-CH<sub>3</sub>), 18.9 (7-CH<sub>3</sub>), 14.3 (6-CO<sub>2</sub>CH<sub>2</sub>CH<sub>3</sub>). ESI-HRMS(+): C<sub>21</sub>H<sub>19</sub>ClN<sub>2</sub>O<sub>4</sub>, calc. for M+H/M+H+2 = 399.1106/401.1077 Da (with <sup>35</sup>Cl/<sup>37</sup>Cl); found: *m/z* 399.1127 [M+H]<sup>+</sup>, 401.1049 [M+H+2]<sup>+</sup>.

*Ethyl 2,7-dimethyl-5-(4-chloro-3-nitrophenyl)-4-oxo-3-propargyl-3,5-dihydro-4H-pyrano[2,3-d]pyrimidine-6-carboxylate (6d)*

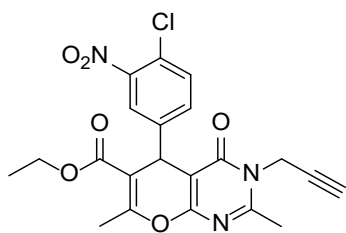

Pale yellow solids, from **5d** (R = 4-Cl-3-NO<sub>2</sub>, 1 mmol, 406 mg). Yield: 391 mg (88.1%). M.p.: 128–130 °C. <sup>1</sup>H NMR (500 MHz, DMSO-*d*<sub>6</sub>), δ (ppm): 8.16 (s, 1H, H-2 phenyl), 7.67 (d, *J* = 7.75 Hz, 1H, H-5 phenyl), 7.51 (d, *J* = 7.75 Hz, 1H, H-6 phenyl), 6.40 (s, 1H, H-5), 5.15 (s, 2H, N-CH<sub>2</sub>C≡CH), 4.04 (q, *J* = 7.25 Hz, 2H, 6-CO<sub>2</sub>CH<sub>2</sub>CH<sub>3</sub>), 2.83 (s, 1H, N-CH<sub>2</sub>C≡CH), 2.64 (s, 3H, 2-CH<sub>3</sub>), 2.30 (s, 3H, 7-CH<sub>3</sub>), 1.14 (t, *J* = 7.25 Hz, 3H, 6-CO<sub>2</sub>CH<sub>2</sub>CH<sub>3</sub>).

*Ethyl 2,7-dimethyl-5-(2-chloro-4-methylphenyl)-4-oxo-3-propargyl-3,5-dihydro-4H-pyrano[2,3-d]pyrimidine-6-carboxylate (6e)*

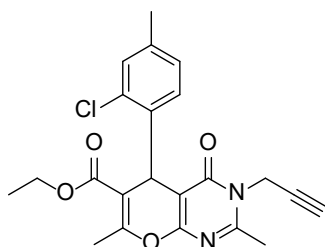

White solids, from **5e** (R = 2-Cl-4-Me, 1 mmol, 375 mg). Yield: 369 mg (89.4%). M.p.: 136–138 °C. <sup>1</sup>H NMR (500 MHz, DMSO-*d*<sub>6</sub>), δ (ppm): 7.41 (s, 1H, H-3 phenyl), 7.28 (d, *J* = 8.5 Hz, 1H, H-5 phenyl), 7.09 (d, *J* = 8.5 Hz, 1H, H-6 phenyl), 6.13 (s, 1H, H-5), 5.15 (s, 2H, N-CH<sub>2</sub>C≡CH), 4.04 (q, *J* = 7.25 Hz, 2H, 6-CO<sub>2</sub>CH<sub>2</sub>CH<sub>3</sub>), 2.83 (s, 1H, N-CH<sub>2</sub>C≡CH), 2.65 (s, 3H, 2-CH<sub>3</sub>), 2.30 (s, 3H, 7-CH<sub>3</sub>), 1.14 (t, *J* = 7.25 Hz, 3H, 6-CO<sub>2</sub>CH<sub>2</sub>CH<sub>3</sub>).

*Ethyl 2,7-dimethyl-5-(2-chloro-4-methoxyphenyl)-4-oxo-3-propargyl-3,5-dihydro-4H-pyrano[2,3-d]pyrimidine-6-carboxylate (6f)*

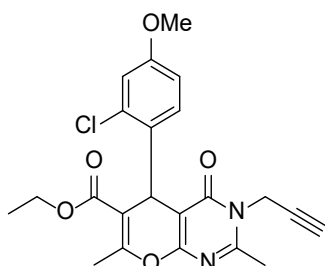

White solids, from **5f** (R = 2-Cl-4-OMe, 1 mmol, 391mg). Yield: 379 mg (88.5%). M.p.: 123–125 °C. <sup>1</sup>H NMR (500 MHz, DMSO-*d*<sub>6</sub>), δ (ppm): 7.27 (d, *J* = 8.75 Hz, 1H, H-5 phenyl), 7.03 (d, *J* = 1.5 Hz, 1H, H-3 phenyl), 6.84 (dd, *J* = 1.5, 8.75 Hz, 1H, H-5 phenyl), 6.13 (s, 1H, H-5), 5.14 (d, *J* = 2.0 Hz, N-CH<sub>2</sub>C≡CH), 4.04 (q, *J* = 7.25 Hz, 2H, 6-CO<sub>2</sub>CH<sub>2</sub>CH<sub>3</sub>), 3.79 (s, 3H, 4-OCH<sub>3</sub> phenyl), 2.83 (s, 1H, N-CH<sub>2</sub>C≡CH), 2.65 (s, 3H, 2-CH<sub>3</sub>), 2.30 (s, 3H, 7-CH<sub>3</sub>), 1.14 (t, *J* = 7.25 Hz, 3H, 6-CO<sub>2</sub>CH<sub>2</sub>CH<sub>3</sub>).

*Ethyl 2,7-dimethyl-5-(5-chloro-2-hydroxy-3-nitrophenylphenyl)-4-oxo-3-propargyl-3,5-*

*dihydro-4H-pyrano[2,3-d]pyrimidine-6-carboxylate (6g)*

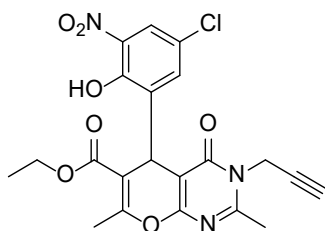

White solids, from **5f** (R = 5-Cl-2-OH-3-NO<sub>2</sub>, 2 mmol, 422 mg). Yield: 412 mg (89.6%). M.p.: 143–145 °C. <sup>1</sup>H NMR (500 MHz, DMSO-*d*<sub>6</sub>), δ (ppm): 11.77 (s, 1H, 2-OH phenyl), 8.02 (s, 1H, H-4 phenyl), 7.51 (s, 1H, H-6 phenyl), 6.37 (s, 1H, H-5), 5.14 (d, *J* = 2.0 Hz, N-CH<sub>2</sub>C≡CH), 4.05 (q, *J* = 7.0 Hz, 2H, 5-CO<sub>2</sub>CH<sub>2</sub>CH<sub>3</sub>), 2.83 (s, 1H, N-CH<sub>2</sub>C≡CH), 2.65 (s, 3H, 2-CH<sub>3</sub>), 2.30 (s, 3H, 7-CH<sub>3</sub>), 1.14 (t, *J* = 7.0 Hz, 3H, 5-CO<sub>2</sub>CH<sub>2</sub>CH<sub>3</sub>).

*Ethyl 2,7-dimethyl-5-(4-bromophenyl)-4-oxo-3-propargyl-3,5-dihydro-4H-pyrano[2,3-d]pyrimidine-6-carboxylate (6h)*

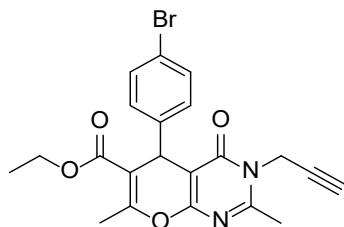

Ivory solids, from **5h** (R = 4-Br, 1 mmol, 405 mg). Yield: 380 mg (85.9%). M.p.: 193–195 °C; ref. [8]: no physical and spectral data. <sup>1</sup>H NMR (500 MHz, DMSO-*d*<sub>6</sub>), δ (ppm): 7.54 (d, *J* = 8.25 Hz, 2H, H-3 & H-5 phenyl), 7.25 (d, *J* = 8.25 Hz, 2H, H-2 & H-6 phenyl), 6.13 (s, 1H, H-5), 5.15 (s, 2H, N-CH<sub>2</sub>C≡CH), 4.03 (q, *J* = 7.0 Hz, 2H, 6-CO<sub>2</sub>CH<sub>2</sub>CH<sub>3</sub>), 2.83 (s, 1H, N-CH<sub>2</sub>C≡CH), 2.65 (s, 3H, 2-CH<sub>3</sub>), 2.29 (s, 3H, 7-CH<sub>3</sub>), 1.14 (t, *J* = 7.0 Hz, 3H, 6-CO<sub>2</sub>CH<sub>2</sub>CH<sub>3</sub>). <sup>13</sup>C NMR (125 MHz, DMSO-*d*<sub>6</sub>), δ (ppm): 166.8 (C=O ester), 161.8, 159.4, 158.7, 158.2, 141.9, 131.2, 128.8, 120.5, 108.8, 98.6, 78.0 (N-CH<sub>2</sub>C≡CH), 72.7 (N-CH<sub>2</sub>C≡CH), 60.2 (6-CO<sub>2</sub>CH<sub>2</sub>CH<sub>3</sub>), 36.7 (C-5), 33.2 (N-CH<sub>2</sub>C≡CH), 20.8 (2-CH<sub>3</sub>), 19.5 (7-CH<sub>3</sub>), 14.3 (6-CO<sub>2</sub>CH<sub>2</sub>CH<sub>3</sub>). ESI-HRMS(+): C<sub>21</sub>H<sub>19</sub>BrN<sub>2</sub>O<sub>4</sub>, calc. for M+H/M+H+2 = 443.0601/445.0580 Da (with <sup>79</sup>Br/<sup>81</sup>Br); found: *m/z* 443.0632 [M+H]<sup>+</sup>, 445.0557 [M+H+2]<sup>+</sup>.

*Ethyl 2,7-dimethyl-5-(4-hydroxyphenyl)-4-oxo-3-propargyl-3,5-dihydro-4H-pyrano[2,3-d]pyrimidine-6-carboxylate (6i)*

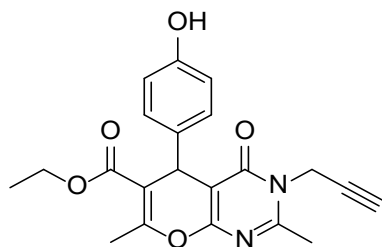

White solids, from **5i** (R = 4-OH, 1 mmol, 342 mg). Yield: 333 mg (87.7%). M.p.: 171–173 °C;

ref. [8]: no physical and spectral data.  $^1\text{H}$  NMR (500 MHz,  $\text{DMSO-}d_6$ ),  $\delta$  (ppm): 8.36 (s, 1H, 4-OH phenyl), 7.04 (d,  $J = 8.25$  Hz, 2H, H-2 & H-6 phenyl), 6.63 (d,  $J = 8.25$  Hz, 2H, H-3 & H-5 phenyl), 6.13 (s, 1H, H-5), 5.14 (s, 2H, N- $\text{CH}_2\text{C}\equiv\text{CH}$ ), 4.03 (q,  $J = 7.25$  Hz, 2H, 6- $\text{CO}_2\text{CH}_2\text{CH}_3$ ), 2.83 (s, 1H, N- $\text{CH}_2\text{C}\equiv\text{CH}$ ), 2.65 (s, 3H, 2- $\text{CH}_3$ ), 2.29 (s, 3H, 7- $\text{CH}_3$ ), 1.14 (t,  $J = 7.0$  Hz, 3H, 6- $\text{CO}_2\text{CH}_2\text{CH}_3$ ).  $^{13}\text{C}$  NMR (125 MHz,  $\text{DMSO-}d_6$ ),  $\delta$  (ppm): 166.8 (C=O ester), 161.8, 159.4, 158.7, 158.2, 155.7, 136.2, 129.1, 114.4, 108.8, 98.6, 78.0 (N- $\text{CH}_2\text{C}\equiv\text{CH}$ ), 72.7 (N- $\text{CH}_2\text{C}\equiv\text{CH}$ ), 60.2 (6- $\text{CO}_2\text{CH}_2\text{CH}_3$ ), 36.2 (C-5), 33.2 (N- $\text{CH}_2\text{C}\equiv\text{CH}$ ), 20.8 (2- $\text{CH}_3$ ), 19.5 (7- $\text{CH}_3$ ), 14.3 (6- $\text{CO}_2\text{CH}_2\text{CH}_3$ ). ESI-HRMS(+):  $\text{C}_{21}\text{H}_{20}\text{N}_2\text{O}_5$ , calc. for  $\text{M}+\text{H} = 381.1445$  Da,  $\text{M}+\text{Na} = 403.1264$  Da; found:  $m/z$  381.1469  $[\text{M}+\text{H}]^+$ ; 403.1229  $[\text{M}+\text{Na}]^+$ .

*Ethyl 2,7-dimethyl-5-(4-methoxyphenyl)-4-oxo-3-propargyl-3,5-dihydro-4H-pyrano[2,3-d]pyrimidine-6-carboxylate (6j)*

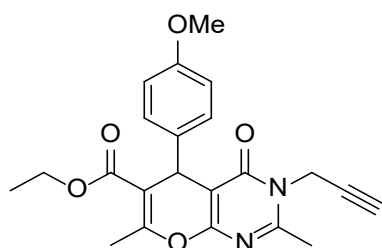

White solids, from **5j** (R = 4-OMe, 1 mmol, 356 mg). Yield: 282 mg 318 mg (80.8%). M.p.: 147–149 °C. ref. [8]: 147–149 °C.  $^1\text{H}$  NMR (500 MHz,  $\text{DMSO-}d_6$ ),  $\delta$  (ppm): 7.13 (d,  $J = 8.75$  Hz, 2H, H-3 & H-5 phenyl), 6.82 (d,  $J = 8.75$  Hz, 2H, H-2 & H-6 phenyl), 4.82–4.72 (m, 1H, N- $\text{CH}_2\text{C}\equiv\text{CH}$ ), 4.76 (s, 1H, H-5), 4.04 (qd,  $J = 7.0$ , 1.4 Hz, 2H, 5- $\text{CO}_2\text{CH}_2\text{CH}_3$ ), 3.35 (s, 3H, N- $\text{CH}_2\text{C}\equiv\text{CH}$ ), 2.58 (s, 3H, 2- $\text{CH}_3$ ), 2.40 (s, 3H, 7- $\text{CH}_3$ ), 1.13 (t,  $J = 7.1$  Hz, 3H, 6- $\text{CO}_2\text{CH}_2\text{CH}_3$ ), 3.70 (s, 3H, 4-OCH<sub>3</sub> phenyl).  $^{13}\text{C}$  NMR (125 MHz,  $\text{DMSO-}d_6$ ),  $\delta$  (ppm): 166.1 (C=O ester), 160.7, 159.5, 158.6, 158.5, 158.1, 136.3, 129.6, 114.0, 108.6, 101.0, 78.2 (N- $\text{CH}_2\text{C}\equiv\text{CH}$ ), 75.6 (N- $\text{CH}_2\text{C}\equiv\text{CH}$ ), 60.7 (6- $\text{CO}_2\text{CH}_2\text{CH}_3$ ), 55.4 (4-OCH<sub>3</sub> phenyl), 36.2 (C-5), 33.3 (N- $\text{CH}_2\text{C}\equiv\text{CH}$ ), 22.6 (2- $\text{CH}_3$ ), 18.8 (7- $\text{CH}_3$ ), 14.3 (6- $\text{CO}_2\text{CH}_2\text{CH}_3$ ). ESI-HRMS(+):  $\text{C}_{22}\text{H}_{22}\text{N}_2\text{O}_5$ , calc. for  $\text{M}+\text{H} = 395.1601$  Da,  $\text{M}+\text{Na} = 417.1421$  Da; found:  $m/z$  395.1633  $[\text{M}+\text{H}]^+$ ; 417.1451  $[\text{M}+\text{Na}]^+$ .

*Ethyl 2,7-dimethyl-5-(4-hydroxy-3-methoxyphenyl)-4-oxo-3-propargyl-3,5-dihydro-4H-pyrano[2,3-d]pyrimidine-6-carboxylate (6k)*

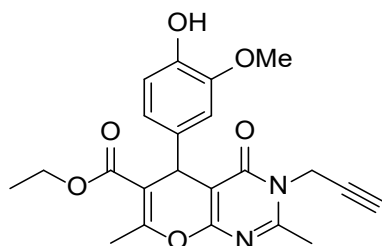

White solids, from **5k** (R = 4-OH-3-OMe, 1 mmol, 372 mg). Yield: 367 mg (89.5%). M.p.:

161–163 °C; ref. [8]: no physical and spectral data.  $^1\text{H}$  NMR (500 MHz,  $\text{DMSO-}d_6$ ),  $\delta$  (ppm): 7.76 (s, 1H, 4-OH phenyl), 6.85–6.82 (m, 2H, H-5 & H-6 phenyl), 6.71 (s, 1H, H-2 phenyl), 6.12 (s, 1H, H-5), 5.15 (s, 2H, N- $\text{CH}_2\text{C}\equiv\text{CH}$ ), 4.04 (q,  $J = 7.25$  Hz, 2H, 6- $\text{CO}_2\text{CH}_2\text{CH}_3$ ), 3.78 (s, 3H, 3- $\text{OCH}_3$  phenyl), 2.83 (s, 1H, N- $\text{CH}_2\text{C}\equiv\text{CH}$ ), 2.65 (s, 3H, 2- $\text{CH}_3$ ), 2.30 (s, 3H, 7- $\text{CH}_3$ ), 1.13 (t,  $J = 7.25$  Hz, 3H, 6- $\text{CO}_2\text{CH}_2\text{CH}_3$ ).  $^{13}\text{C}$  NMR (125 MHz,  $\text{DMSO-}d_6$ ),  $\delta$  (ppm): 166.9 (C=O ester), 161.7, 159.4, 158.7, 158.2, 147.6, 145.2, 134.4, 122.2, 115.1, 111.8, 108.4, 98.8, 78.0 (N- $\text{CH}_2\text{C}\equiv\text{CH}$ ), 72.7 (N- $\text{CH}_2\text{C}\equiv\text{CH}$ ), 60.2 (6- $\text{CO}_2\text{CH}_2\text{CH}_3$ ), 56.1 (3- $\text{OCH}_3$  phenyl), 38.6 (C-5), 33.2 (N- $\text{CH}_2\text{C}\equiv\text{CH}$ ), 20.8 (2- $\text{CH}_3$ ), 19.5 (7- $\text{CH}_3$ ), 14.3 (6- $\text{CO}_2\text{CH}_2\text{CH}_3$ ). ESI-HRMS(+):  $\text{C}_{22}\text{H}_{22}\text{N}_2\text{O}_6$ , calc. for  $\text{M}+\text{H} = 411.1551$  Da,  $\text{M}+\text{Na} = 433.1370$  Da; found:  $m/z$  411.1579  $[\text{M}+\text{H}]^+$ ; 433.1345  $[\text{M}+\text{Na}]^+$ .

*Ethyl 2,7-dimethyl-5-(3-hydroxy-4-methoxyphenyl)-4-oxo-3-propargyl-3,5-dihydro-4H-pyrano[2,3-d]pyrimidine-6-carboxylate (5l)*

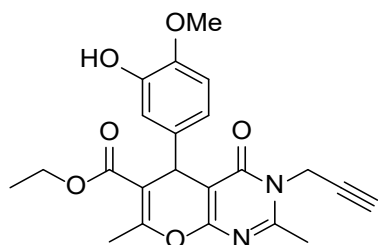

White solids, from **4l** (R = 3-OH-4-OMe, 1 mmol, 372 mg). Yield: 365 mg (89.2%); M.p.: 148–149 °C.  $^1\text{H}$  NMR (500 MHz,  $\text{DMSO-}d_6$ ),  $\delta$  (ppm): 7.60 (s, 1H, 3-OH phenyl), 6.91 (s, 1H, H-2 phenyl), 6.89 (d,  $J = 8.5$  Hz, 1H, H-5 phenyl), 6.81 (d,  $J = 8.5$  Hz, 1H, H-6 phenyl), 6.05 (s, 1H, H-5), 5.15 (s, 2H, N- $\text{CH}_2\text{C}\equiv\text{CH}$ ), 4.05 (q,  $J = 7.0$  Hz, 2H, 5- $\text{CO}_2\text{CH}_2\text{CH}_3$ ), 3.82 (s, 3H, 4- $\text{OCH}_3$  phenyl), 2.83 (s, 1H, N- $\text{CH}_2\text{C}\equiv\text{CH}$ ), 2.65 (s, 3H, 2- $\text{CH}_3$ ), 2.29 (s, 3H, 7- $\text{CH}_3$ ), 1.13 (t,  $J = 7.0$  Hz, 3H, 5- $\text{CO}_2\text{CH}_2\text{CH}_3$ ).

*Ethyl 2,7-dimethyl-5-(2,3-dihydroxyphenyl)-4-oxo-3-propargyl-3,5-dihydro-4H-pyrano[2,3-d]pyrimidine-6-carboxylate (5m)*

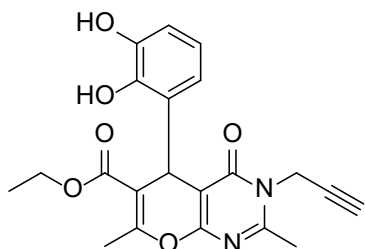

White solids, from **4m** (R = 2,3-diOH, 1 mmol, 358 mg). Yield: 350 mg (88.5%); M.p.: 155–157 °C.  $^1\text{H}$  NMR (500 MHz,  $\text{DMSO-}d_6$ ),  $\delta$  (ppm): 8.40 (s, 1H, 3-OH phenyl), 7.76 (s, 1H, 2-OH phenyl), 6.91 (d,  $J = 7.75$  Hz, 1H, H-6 phenyl), 6.89 (t,  $J = 7.75$  Hz, 1H, H-5 phenyl), 5.96 (s, 1H, H-5), 5.75 (d,  $J = 7.75$  Hz, 1H, H-4 phenyl), 5.15 (s, 2H, N- $\text{CH}_2\text{C}\equiv\text{CH}$ ), 4.05 (q,  $J = 7.0$  Hz, 2H, 5- $\text{CO}_2\text{CH}_2\text{CH}_3$ ), 3.82 (s, 3H, 4- $\text{OCH}_3$  phenyl), 2.83 (s, 1H, N- $\text{CH}_2\text{C}\equiv\text{CH}$ ), 2.65 (s, 3H, 2- $\text{CH}_3$ ), 2.29 (s, 3H, 7- $\text{CH}_3$ ), 1.13 (t,  $J = 7.0$  Hz, 3H, 5- $\text{CO}_2\text{CH}_2\text{CH}_3$ ).

*Ethyl 2,7-dimethyl-5-(2,4-dihydroxyphenyl)-4-oxo-3-propargyl-3,5-dihydro-4H-pyrano[2,3-*

*d*]pyrimidine-6-carboxylate (**5n**)

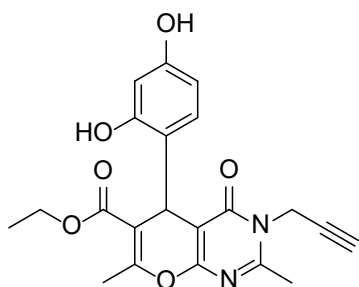

White solids, from **4n** (R = 2,4-diOH, 1 mmol, 358 mg). Yield: 353 mg (89.2%); M.p.: 178–179 °C. <sup>1</sup>H NMR (500 MHz, DMSO-*d*<sub>6</sub>), δ (ppm): 8.33 (s, 1H, 2-OH phenyl), 7.91 (s, 1H, 4-OH phenyl), 7.13 (d, *J* = 9.0 Hz, 1H, H-6 phenyl), 6.45 (dd, *J* = 1.75, 8.5 Hz, 1H, H-5 phenyl), 6.35 (d, *J* = 1.75 Hz, 1H, H-3 phenyl), 6.09 (s, 1H, H-5), 5.14 (d, *J* = 2.0 Hz, N-CH<sub>2</sub>C≡CH), 4.05 (q, *J* = 7.0 Hz, 2H, 5-CO<sub>2</sub>CH<sub>2</sub>CH<sub>3</sub>), 3.82 (s, 3H, 4-OCH<sub>3</sub> phenyl), 2.83 (s, 1H, N-CH<sub>2</sub>C≡CH), 2.65 (s, 3H, 2-CH<sub>3</sub>), 2.29 (s, 3H, 7-CH<sub>3</sub>), 1.13 (t, *J* = 7.0 Hz, 3H, 5-CO<sub>2</sub>CH<sub>2</sub>CH<sub>3</sub>).

*Ethyl 2,7-dimethyl-5-(3,4-dimethoxyphenyl)-4-oxo-3-propargyl-3,5-dihydro-4H-pyrano[2,3-d]pyrimidine-6-carboxylate (6o)*

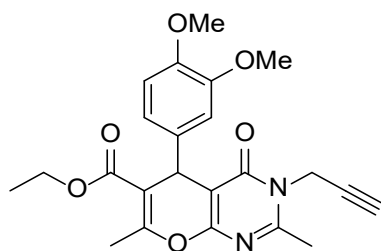

White solids, from **5o** (R = 3,4-diOMe, 1 mmol, 386 mg). Yield: 371 mg (87.4%). M.p.: 142–144 °C. <sup>1</sup>H NMR (500 MHz, DMSO-*d*<sub>6</sub>), δ (ppm): 6.93–6.89 (m, 2H, H-5 & H-6 phenyl), 6.81 (s, 1H, H-2 phenyl), 6.12 (s, 1H, H-5), 5.15 (d, *J* = 2.0 Hz, 2H, N-CH<sub>2</sub>C≡CH), 4.04 (q, *J* = 7.25 Hz, 2H, 6-CO<sub>2</sub>CH<sub>2</sub>CH<sub>3</sub>), 3.80 (s, 3H, 3-OCH<sub>3</sub> phenyl), 3.74 (s, 3H, 4-OCH<sub>3</sub> phenyl), 2.83 (s, 1H, N-CH<sub>2</sub>C≡CH), 2.65 (s, 3H, 2-CH<sub>3</sub>), 2.30 (s, 3H, 7-CH<sub>3</sub>), 1.14 (t, *J* = 7.25 Hz, 3H, 6-CO<sub>2</sub>CH<sub>2</sub>CH<sub>3</sub>). <sup>13</sup>C NMR (125 MHz, DMSO-*d*<sub>6</sub>), δ (ppm): 166.9 (C=O ester), 161.7, 159.4, 158.7, 158.2, 149.2, 148.3, 135.8, 122.1, 113.1, 112.1, 108.3, 98.8, 78.0 (N-CH<sub>2</sub>C≡CH), 72.7 (N-CH<sub>2</sub>C≡CH), 60.2 (6-CO<sub>2</sub>CH<sub>2</sub>CH<sub>3</sub>), 55.91 (4-OCH<sub>3</sub> phenyl), 55.89 (3-OCH<sub>3</sub> phenyl), 38.6 (C-5), 33.2 (N-CH<sub>2</sub>C≡CH), 20.8 (2-CH<sub>3</sub>), 19.5 (7-CH<sub>3</sub>), 14.3 (6-CO<sub>2</sub>CH<sub>2</sub>CH<sub>3</sub>). ESI-HRMS(+): C<sub>23</sub>H<sub>24</sub>N<sub>2</sub>O<sub>6</sub>, calc. for M+H = 425.1707 Da, M+Na = 447.1527 Da; found: *m/z* 425.1728 [M+H]<sup>+</sup>; 447.1552 [M+Na]<sup>+</sup>.

*Ethyl 2,7-dimethyl-5-(2,4-dimethoxyphenyl)-4-oxo-3-propargyl-3,5-dihydro-4H-pyrano[2,3-d]pyrimidine-6-carboxylate (5p)*

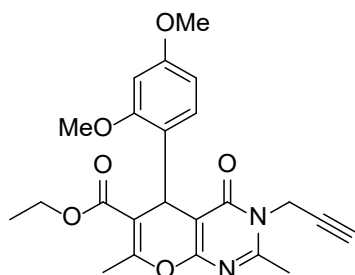

White solids, from **4p** (R = 2,4-diOMe, 1 mmol, 386 mg). Yield: 370 mg (87.2%); M.p.: 146–148 °C. <sup>1</sup>H NMR (500 MHz, DMSO-*d*<sub>6</sub>), δ (ppm): 6.93 (d, *J* = 8.0 Hz, 1H, H-6 phenyl), 6.57 (d, *J* = 1.5 Hz, 1H, H-3 phenyl), 6.45 (dd, *J* = 1.5, 8.0 Hz, 1H, H-5 phenyl), 6.12 (s, 1H, H-5), 5.14 (d, *J* = 2.0 Hz, 2H, N-CH<sub>2</sub>C≡CH), 4.04 (q, *J* = 7.25 Hz, 2H, 6-CO<sub>2</sub>CH<sub>2</sub>CH<sub>3</sub>), 3.83 (s, 3H, 2-OCH<sub>3</sub> phenyl), 3.79 (s, 3H, 4-OCH<sub>3</sub> phenyl), 2.83 (s, 1H, N-CH<sub>2</sub>C≡CH), 2.65 (s, 3H, 2-CH<sub>3</sub>), 2.30 (s, 3H, 7-CH<sub>3</sub>), 1.14 (t, *J* = 7.25 Hz, 3H, 6-CO<sub>2</sub>CH<sub>2</sub>CH<sub>3</sub>).

*Ethyl 2,7-dimethyl-5-(2,5-dimethoxyphenyl)-4-oxo-3-propargyl-3,5-dihydro-4H-pyrano[2,3-d]pyrimidine-6-carboxylate (5q)*

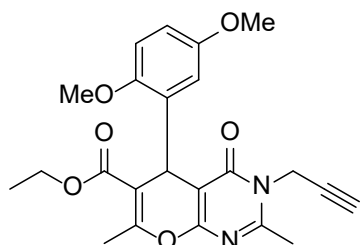

White solids, from **4q** (R = 2,5-diOMe, 2 mmol, 688 mg). Yield: 368 mg (86.9%); M.p.: 135–137 °C. <sup>1</sup>H NMR (500 MHz, DMSO-*d*<sub>6</sub>), δ (ppm): 6.95 (s, 1H, H-6 phenyl), 6.94 (d, *J* = 7.75 Hz, 1H, H-3 phenyl), 6.81 (dd, *J* = 1.5, 7.75 Hz, 1H, H-4 phenyl), 6.05 (s, 1H, H-5), 5.14 (d, *J* = 2.0 Hz, 2H, N-CH<sub>2</sub>C≡CH), 4.04 (q, *J* = 7.25 Hz, 2H, 6-CO<sub>2</sub>CH<sub>2</sub>CH<sub>3</sub>), 3.82 (s, 3H, 2-OCH<sub>3</sub> phenyl), 3.78 (s, 3H, 5-OCH<sub>3</sub> phenyl), 2.83 (s, 1H, N-CH<sub>2</sub>C≡CH), 2.64 (s, 3H, 2-CH<sub>3</sub>), 2.30 (s, 3H, 7-CH<sub>3</sub>), 1.14 (t, *J* = 7.25 Hz, 3H, 6-CO<sub>2</sub>CH<sub>2</sub>CH<sub>3</sub>).

*Ethyl 2,7-dimethyl-5-(2,6-dimethoxyphenyl)-4-oxo-3-propargyl-3,5-dihydro-4H-pyrano[2,3-d]pyrimidine-6-carboxylate (5r)*

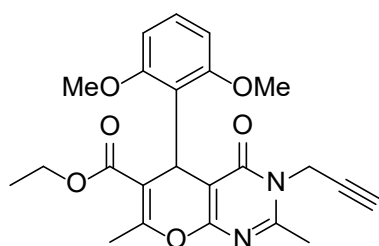

White solids, from **4r** (R = 2,6-diOMe, 2 mmol, 688 mg). Yield: 366 mg (86.3%); M.p.: 157–159 °C. <sup>1</sup>H NMR (500 MHz, DMSO-*d*<sub>6</sub>), δ (ppm): 7.21 (t, *J* = 8.5 Hz, 1H, H-4 phenyl), 6.50 (d, *J* = 8.5 Hz, 2H, H-3 & H-5 phenyl), 6.18 (s, 1H, H-5), 5.15 (s, 2H, N-CH<sub>2</sub>C≡CH), 4.04 (q, *J* = 7.25 Hz, 2H, 6-CO<sub>2</sub>CH<sub>2</sub>CH<sub>3</sub>), 3.83 (s, 6H, 2-OCH<sub>3</sub> & 6-OCH<sub>3</sub> phenyl), 2.83 (s, 1H, N-CH<sub>2</sub>C≡CH), 2.65 (s, 3H, 2-CH<sub>3</sub>), 2.29 (s, 3H, 7-CH<sub>3</sub>), 1.13 (t, *J* = 7.25 Hz, 3H, 6-CO<sub>2</sub>CH<sub>2</sub>CH<sub>3</sub>).

*Ethyl 2,7-dimethyl-5-(4-dimethylaminophenyl)-4-oxo-3-propargyl-3,5-dihydro-4H-*

pyrano[2,3-d]pyrimidine-6-carboxylate (**6s**)

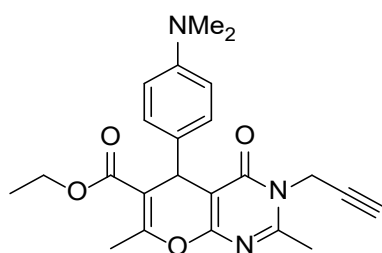

White solids, from **5s** (R = 4-NMe<sub>2</sub>, 1 mmol, 369 mg). Yield: 332 mg (81.7%). M.p.: 155–157 °C. <sup>1</sup>H NMR (500 MHz, DMSO-*d*<sub>6</sub>), δ (ppm): 7.07 (d, *J* = 8.5 Hz, 2H, H-2 & H-6 phenyl), 6.60 (d, *J* = 8.5 Hz, 2H, H-3 & H-5 phenyl), 6.13 (s, 1H, H-5), 5.15 (s, 2H, N-CH<sub>2</sub>C≡CH), 4.04 (q, *J* = 7.25 Hz, 2H, 6-CO<sub>2</sub>CH<sub>2</sub>CH<sub>3</sub>), 2.98 [s, 6H, 4-N(CH<sub>3</sub>)<sub>2</sub> phenyl], 2.83 (s, 1H, N-CH<sub>2</sub>C≡CH), 2.65 (s, 3H, 2-CH<sub>3</sub>), 2.30 (s, 3H, 7-CH<sub>3</sub>), 1.13 (t, *J* = 7.25 Hz, 3H, 6-CO<sub>2</sub>CH<sub>2</sub>CH<sub>3</sub>). <sup>13</sup>C NMR (125 MHz, DMSO-*d*<sub>6</sub>), δ (ppm): 166.8 (C=O ester), 161.8, 159.4, 158.7, 158.2, 149.5, 135.5, 128.6, 112.3, 108.8, 98.6, 78.0 (N-CH<sub>2</sub>C≡CH), 72.7 (N-CH<sub>2</sub>C≡CH), 60.2 (6-CO<sub>2</sub>CH<sub>2</sub>CH<sub>3</sub>), 40.3 [4-N(CH<sub>3</sub>)<sub>2</sub> phenyl], 37.2 (C-5), 33.2 (N-CH<sub>2</sub>C≡CH), 20.8 (2-CH<sub>3</sub>), 19.5 (7-CH<sub>3</sub>), 14.3 (6-CO<sub>2</sub>CH<sub>2</sub>CH<sub>3</sub>). ESI-HRMS(+): C<sub>23</sub>H<sub>25</sub>N<sub>3</sub>O<sub>4</sub>, calc. for M+H = 408.1918 Da, M+Na = 430.1737 Da; found: *m/z* 408.1942 [M+H]<sup>+</sup>; 430.1754 [M+Na]<sup>+</sup>.

## References

1. Thanh ND, Hai DS, Ngoc Bich VT, Thu Hien PT, Ky Duyen NT, Mai NT, Dung TT, Toan VN, Kim Van HT, Dang LH, Toan DN, Thanh Van TT, Efficient click chemistry towards novel 1*H*-1,2,3-triazole-tethered 4*H*-chromene–D-glucose conjugates: Design, synthesis and evaluation of in vitro antibacterial, MRSA and antifungal activities, *European Journal of Medicinal Chemistry*, 167 (2019) 454–471.
2. Kumar D, Reddy VB, Sharad S, Dube U, Kapur S, A facile one-pot green synthesis and antibacterial activity of 2-amino-4*H*-pyrans and 2-amino-5-oxo-5,6,7,8-tetrahydro-4*H*-chromenes, *European Journal of Medicinal Chemistry*, 44 (2009) 3805–3809.
3. Wang X-S, Zeng Z-S, Zhang M-M, Li Y-L, Shi D-Q, Tu S-J, Wei X-Y, Zong Z-M, A Convenient and Clean Procedure for the Synthesis of Pyran Derivatives in Aqueous Media Catalysed by Tebac, *Journal of Chemical Research*, 2006 (2006) 228–230.
4. Mansoor SS, Logaiya K, Aswin K, Sudhan PN, An appropriate one-pot synthesis of 3,4-dihydropyrano[*c*]chromenes and 6-amino-5-cyano-4-aryl-2-methyl-4*H*-pyrans with thiourea dioxide as an efficient, reusable organic catalyst in aqueous medium, *Journal of Taibah University for Science*, 9 (2015) 213–226.



5. Safaei-Ghomi J, Teymuri R, Shahbazi-Alavi H, Ziarati A, SnCl<sub>2</sub>/nano SiO<sub>2</sub>: A green and reusable heterogeneous catalyst for the synthesis of polyfunctionalized 4H-pyrans, *Chinese Chemical Letters*, 24 (2013) 921-925.
6. Kumar BS, Lakshmi PVA, Veena BS, Sujatha E, Synthesis and antibacterial activity of novel pyrano[2,3-d]pyrimidine-4-one-3-phenylisoxazole hybrids, *Russian Journal of General Chemistry*, 87 (2017) 829-836.
7. Boda SK, Pishka V, Lakshmi PVA, Chinde S, Grover P, 1,2,3-Triazole Tagged 3H-Pyrano[2,3-d]pyrimidine-6-carboxylate Derivatives: Synthesis, in Vitro Cytotoxicity, Molecular Docking and DNA Interaction Studies, *Chemistry & Biodiversity*, 15 (2018) e18000101.
8. Thanh ND, Hai DS, Ha NTT, Tung DT, Le CT, Van HTK, Toan VN, Toan DN, Dang LH, Synthesis, biological evaluation and molecular docking study of 1,2,3-1H-triazoles having 4H-pyrano[2,3-d]pyrimidine as potential Mycobacterium tuberculosis protein tyrosine phosphatase B inhibitors, *Bioorganic & Medicinal Chemistry Letters*, 29 (2019) 164-171.

#### 4. NMR spectra of compounds 5a-5s

*Ethyl 2,7-dimethyl-5-phenyl-4-oxo-3,5-dihydro-4H-pyrano[2,3-d]pyrimidine-6-carboxylates (5a)*

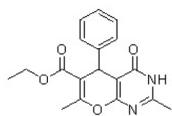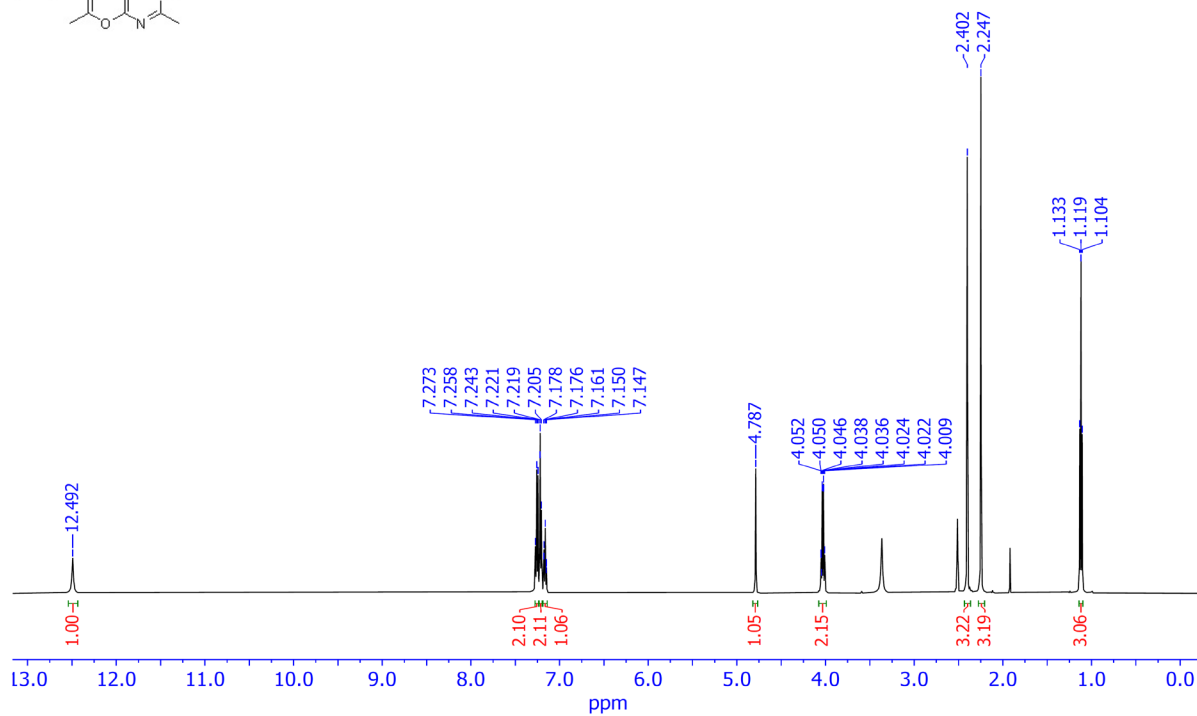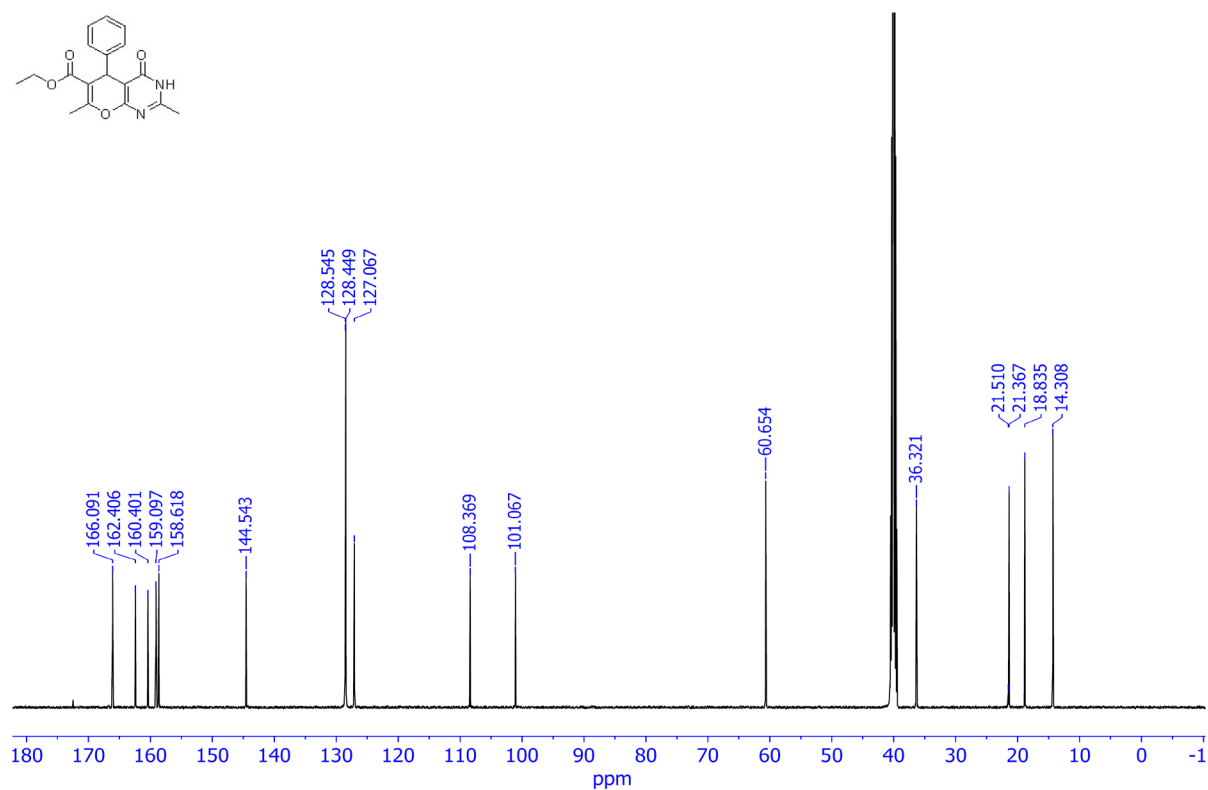

Ethyl 2,7-dimethyl-5-(4-nitrophenyl)-4-oxo-3,5-dihydro-4H-pyrano[2,3-d]pyrimidine-6-carboxylates (**5b**)

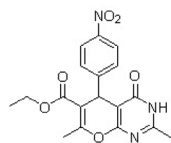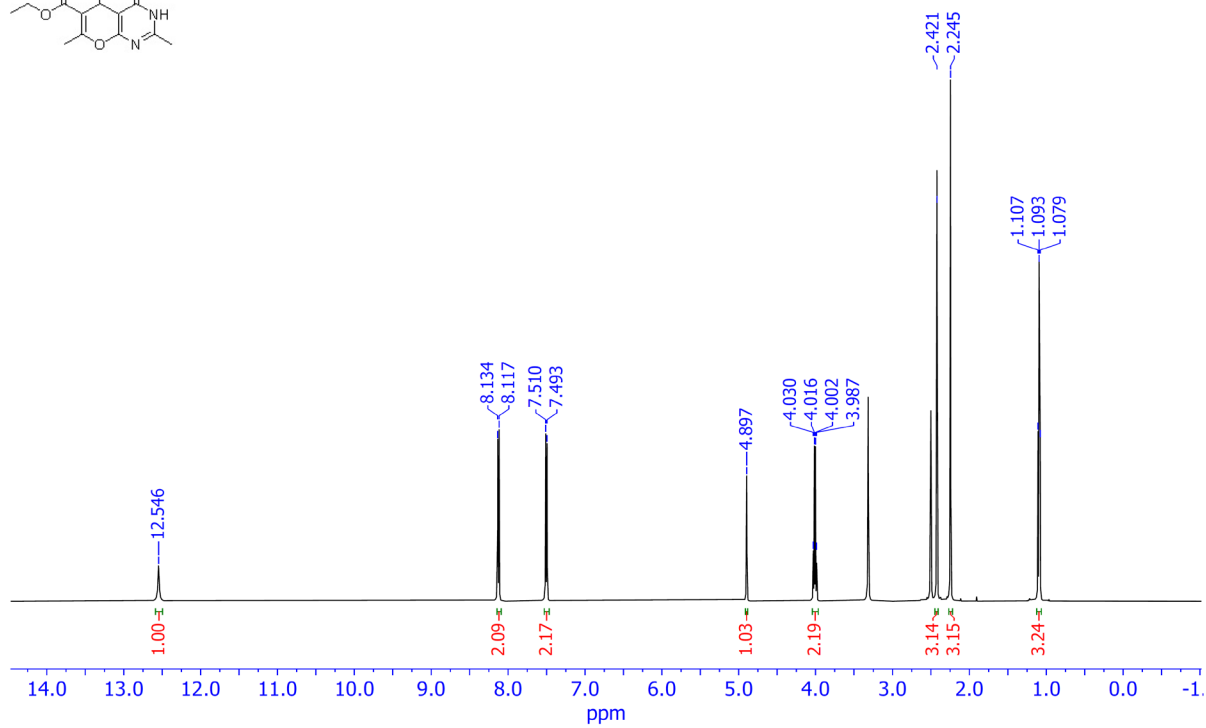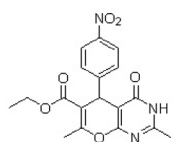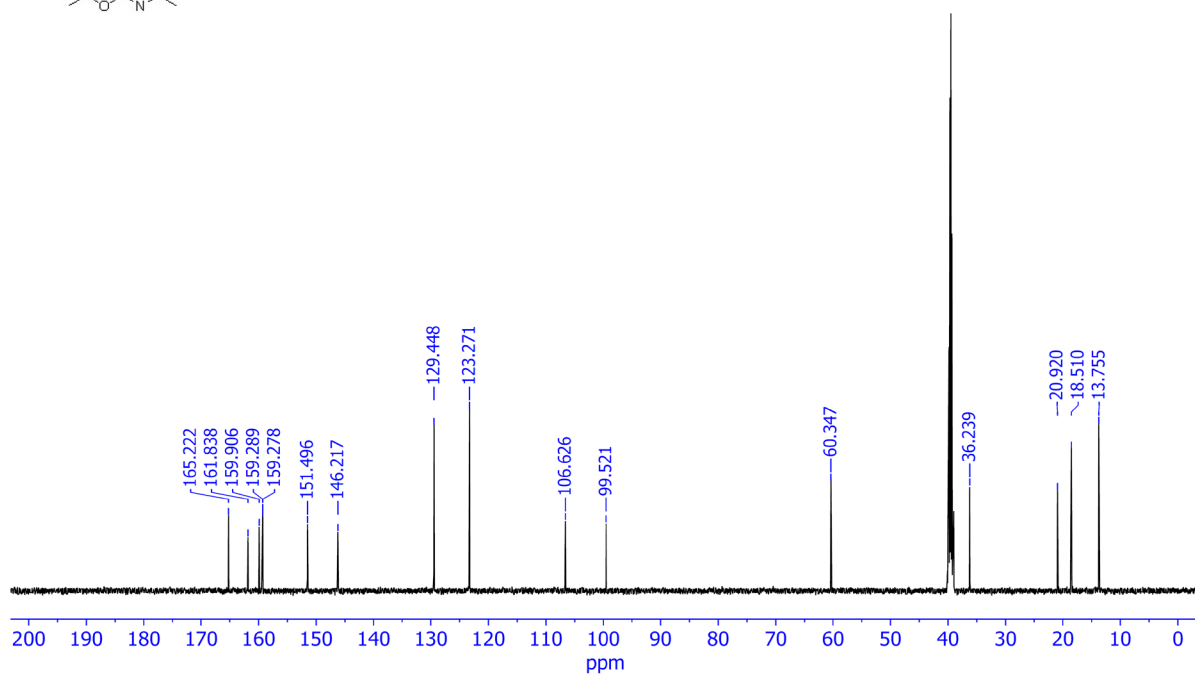

Ethyl 2,7-dimethyl-5-(4-chlorophenyl)-4-oxo-3,5-dihydro-4H-pyrano[2,3-d]pyrimidine-6-carboxylates (**5d**)

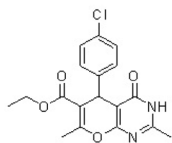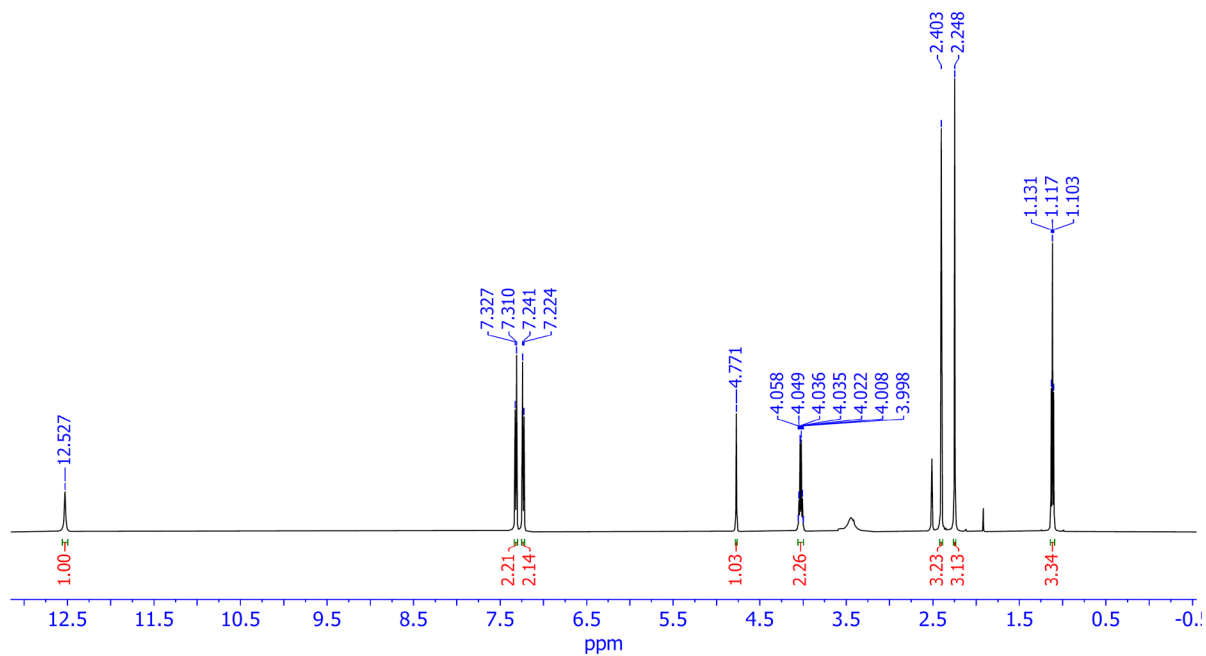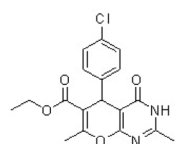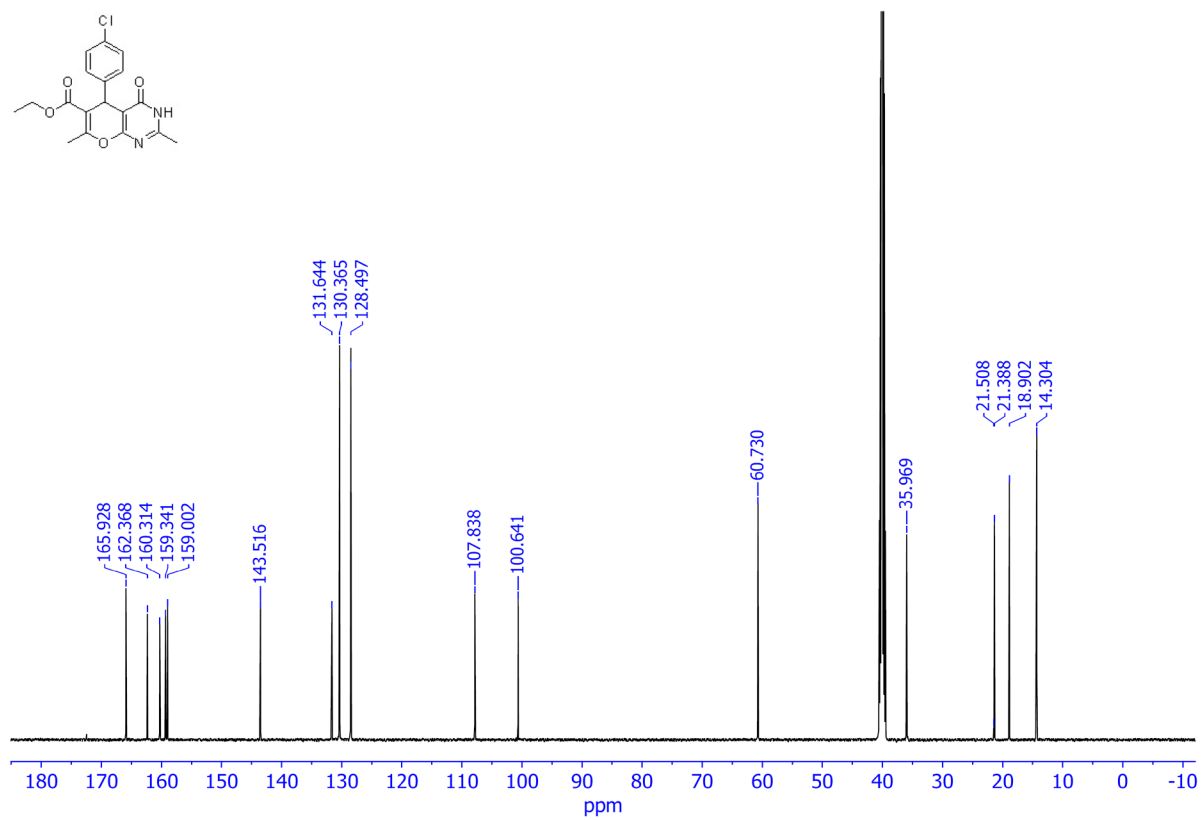

Ethyl 2,7-dimethyl-5-(4-bromophenyl)-4-oxo-3,5-dihydro-4H-pyrano[2,3-d]pyrimidine-6-carboxylates (**5f**)

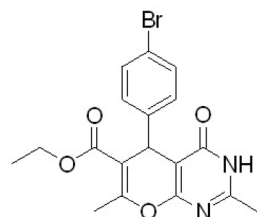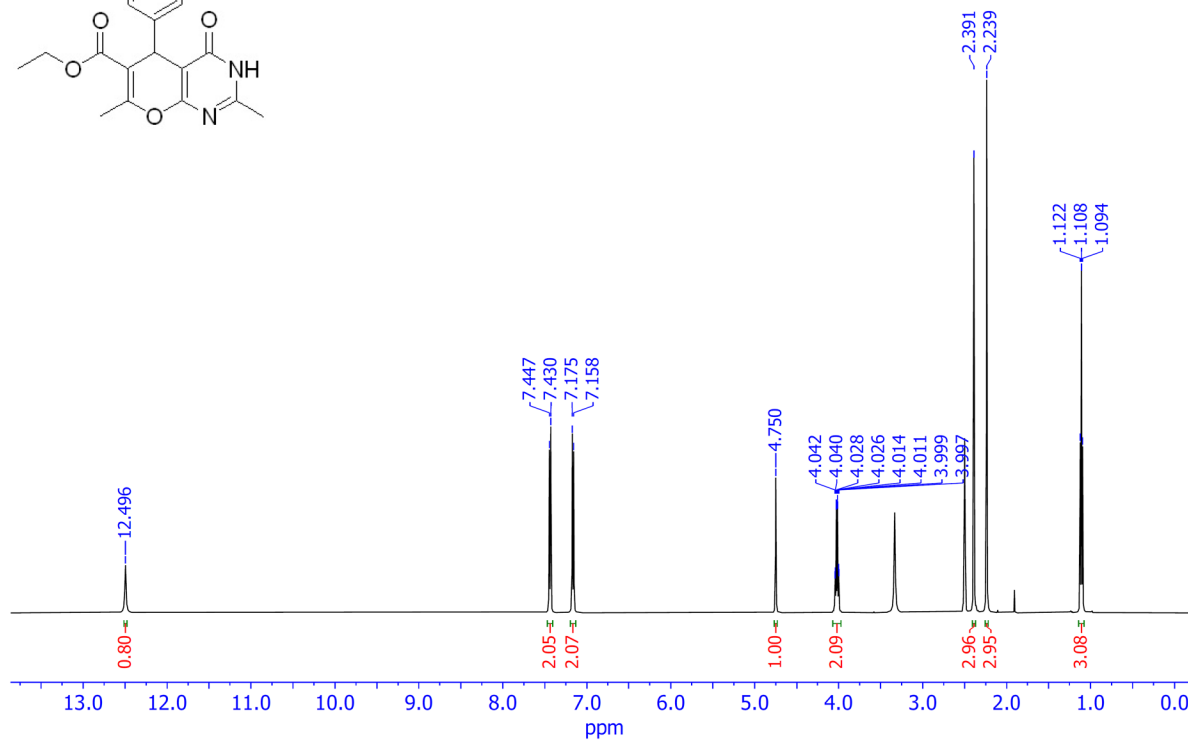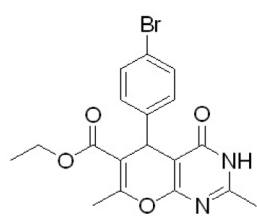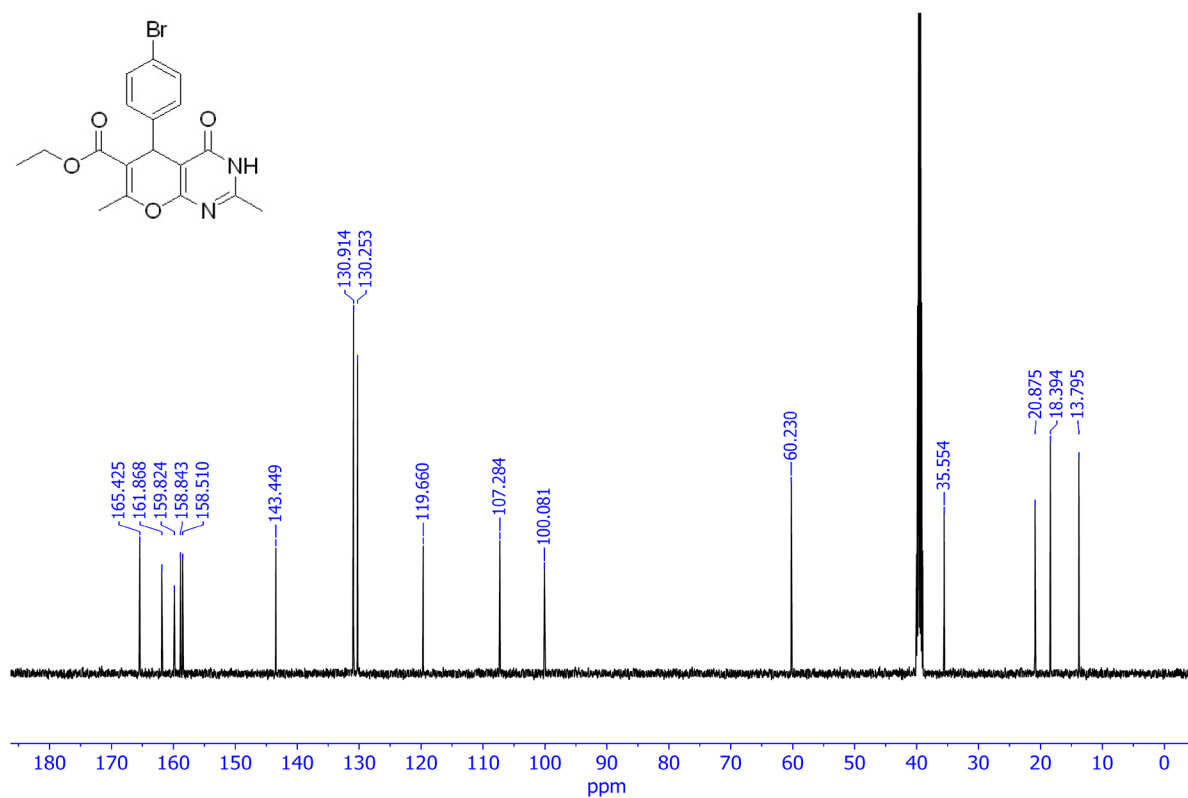

Ethyl 2,7-dimethyl-5-(4-hydroxyphenyl)-4-oxo-3,5-dihydro-4H-pyrano[2,3-d]pyrimidine-6-carboxylates (**5i**)

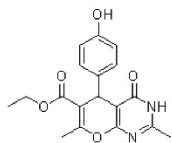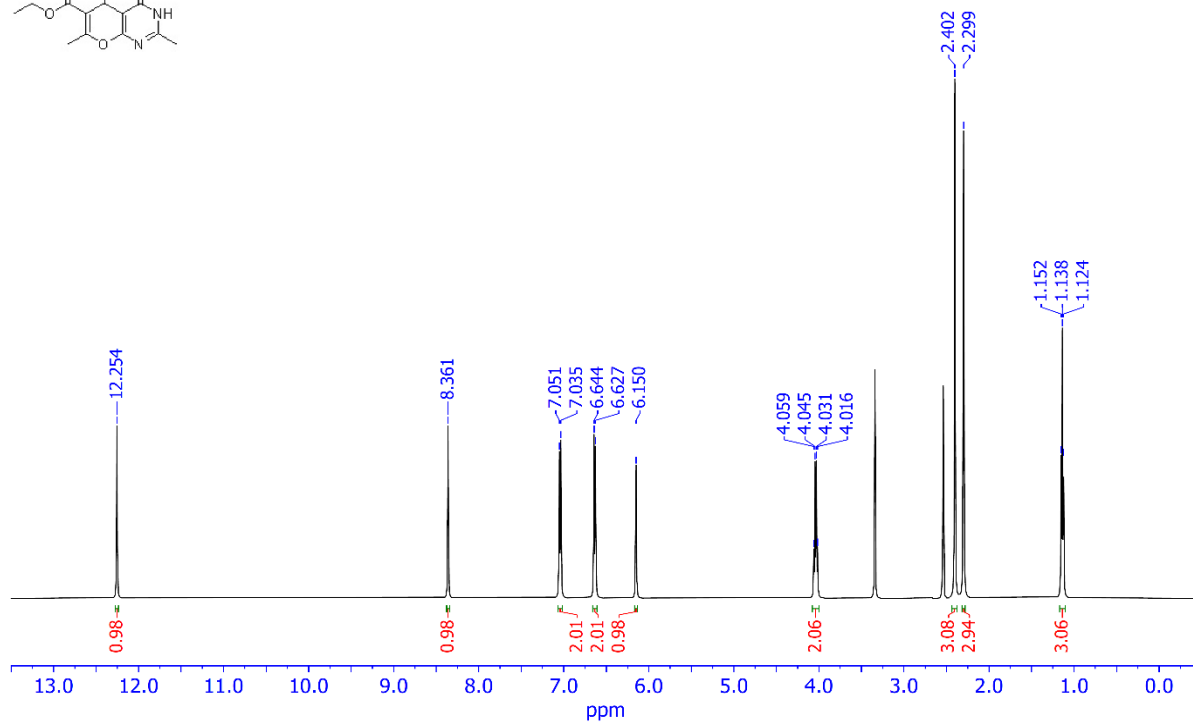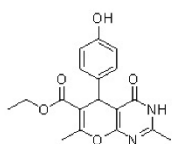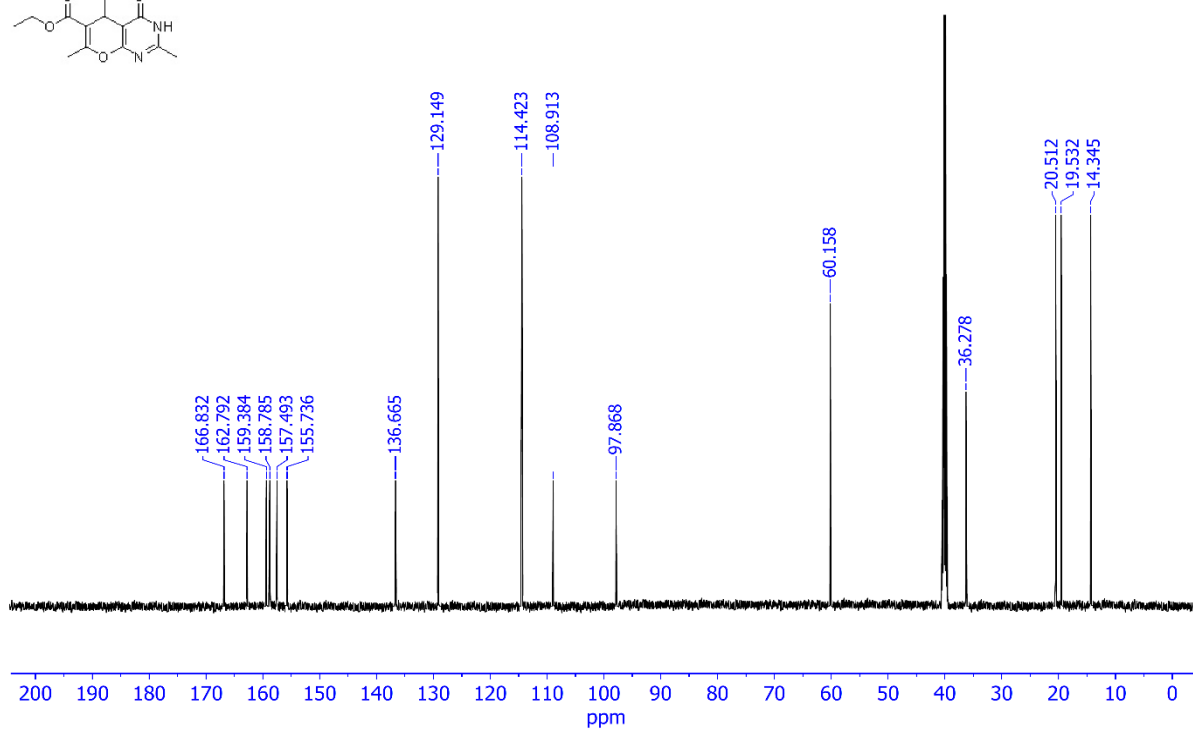

*Ethyl 2,7-dimethyl-5-(4-methoxyphenyl)-4-oxo-3,5-dihydro-4H-pyrano[2,3-d]pyrimidine-6-carboxylates (5k)*

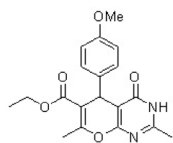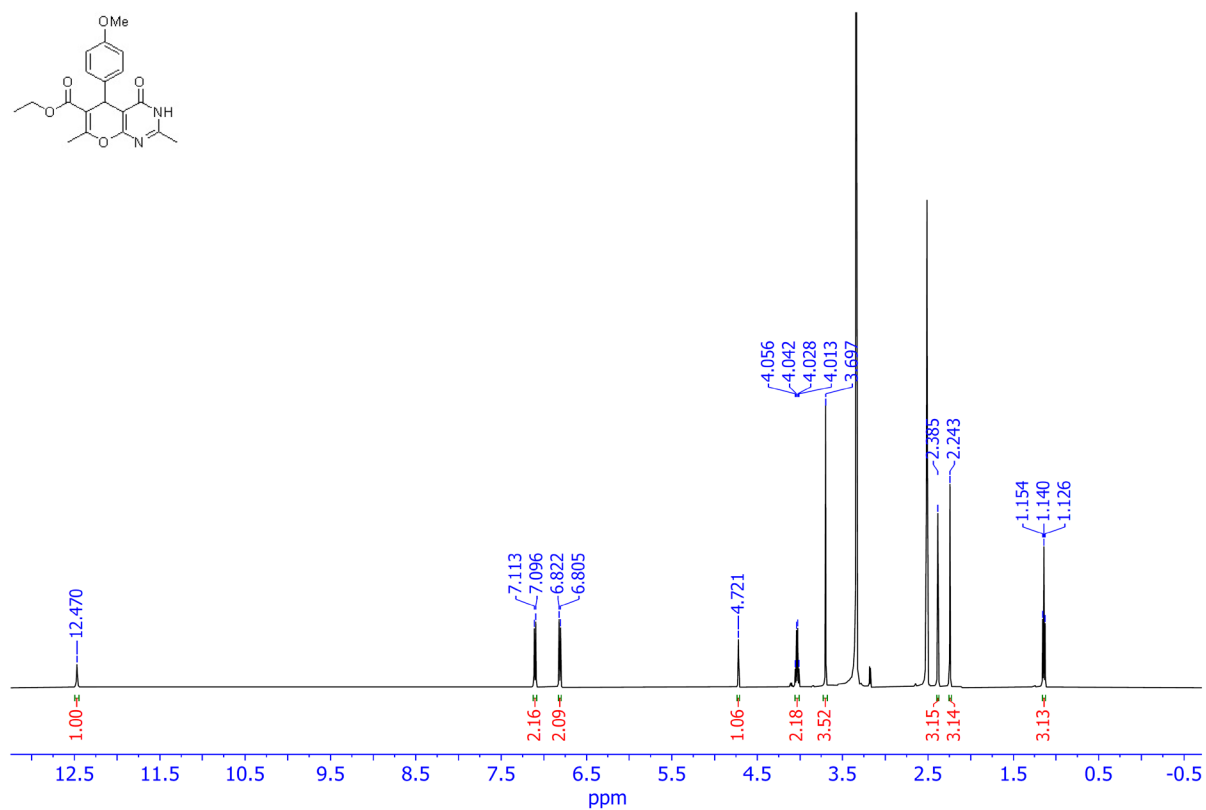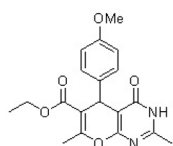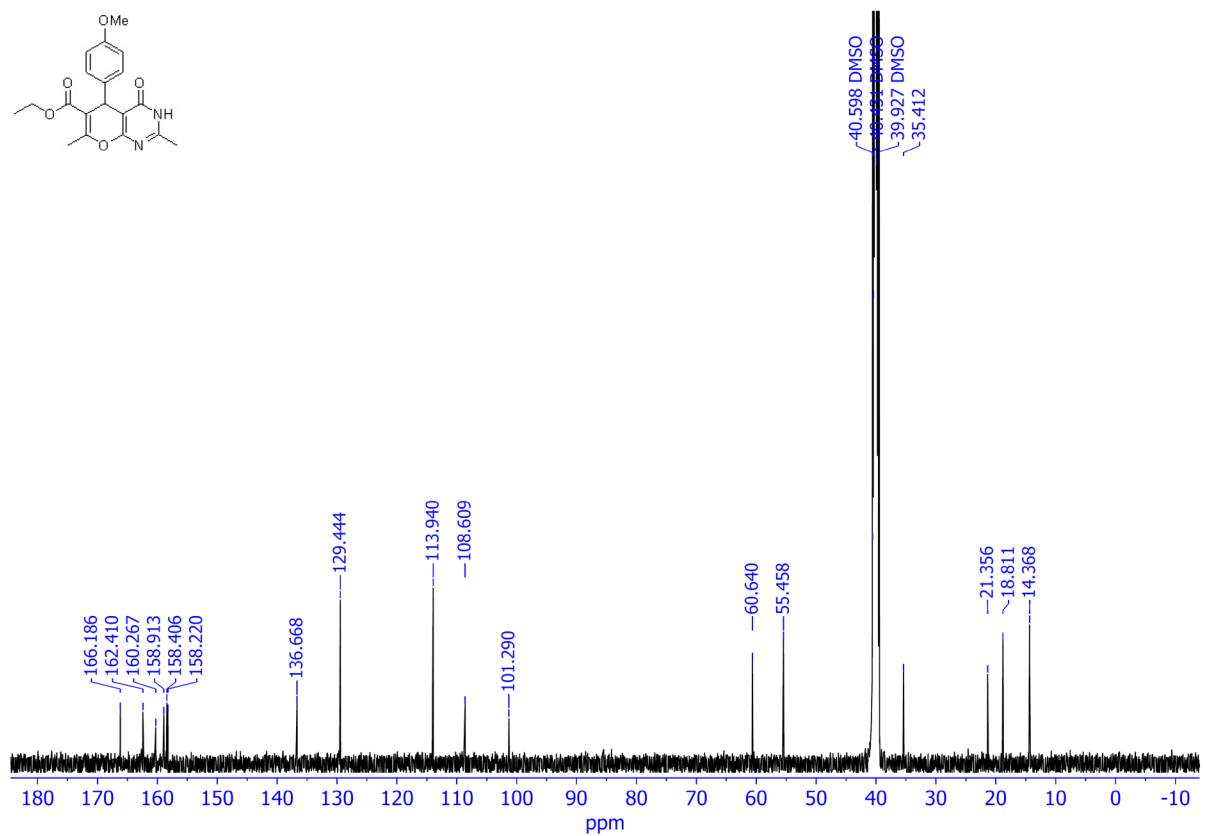

*Ethyl 2,7-dimethyl-5-(3-methoxyphenyl)-4-oxo-3,5-dihydro-4H-pyrano[2,3-d]pyrimidine-6-carboxylates (5I)*

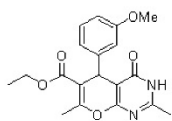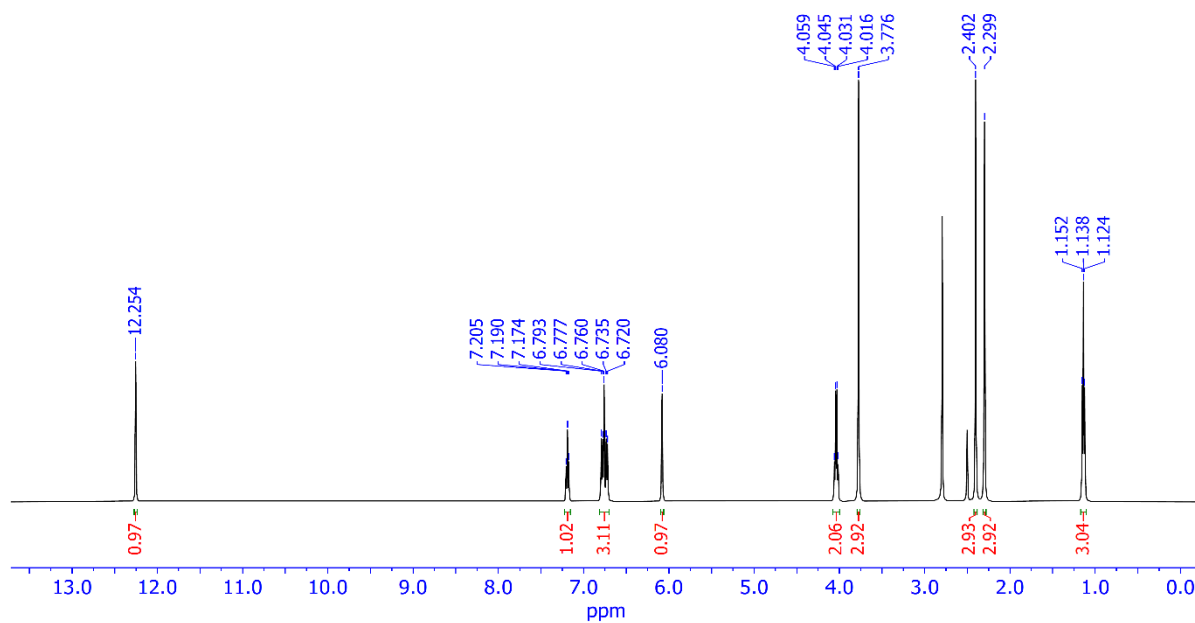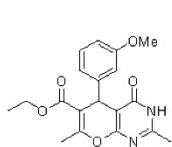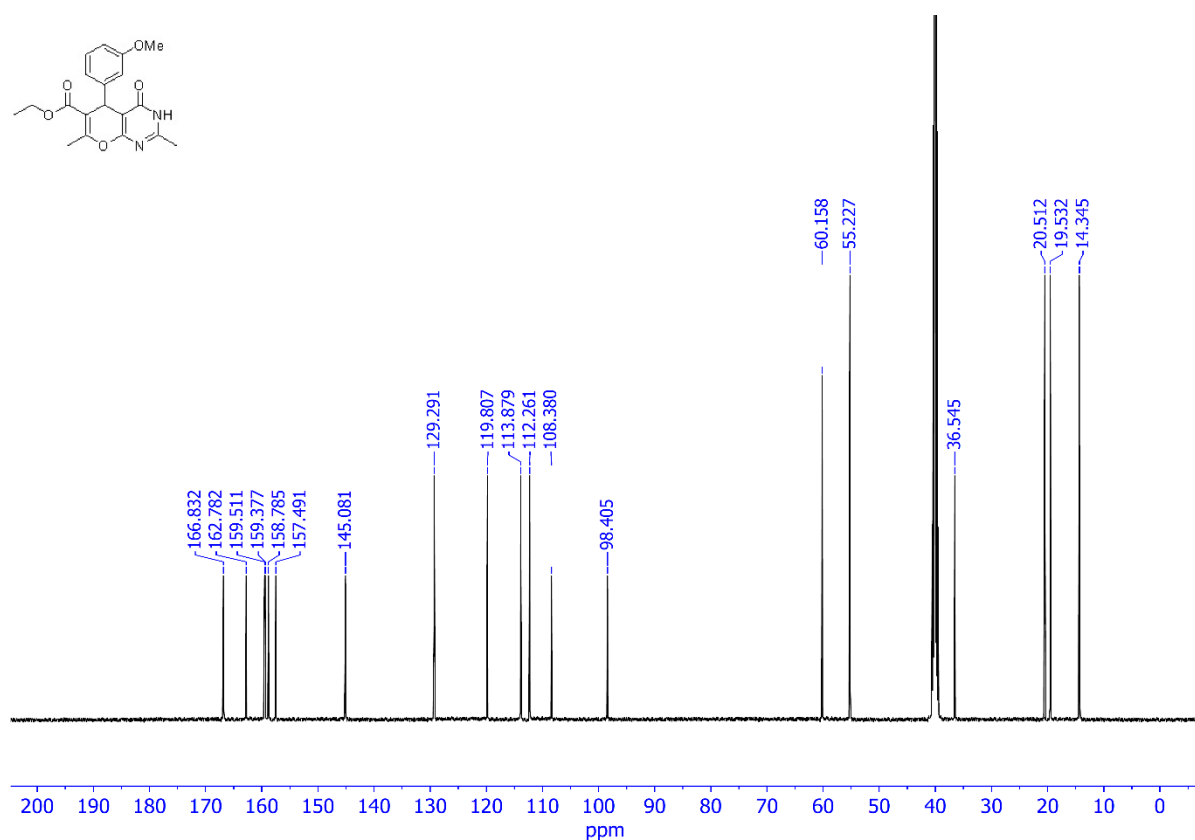



*Ethyl 2,7-dimethyl-5-(3,4-dimethoxyphenyl)-4-oxo-3,5-dihydro-4H-pyrano[2,3-d]pyrimidine-6-carboxylates (5m)*

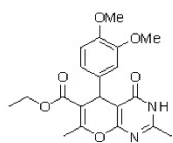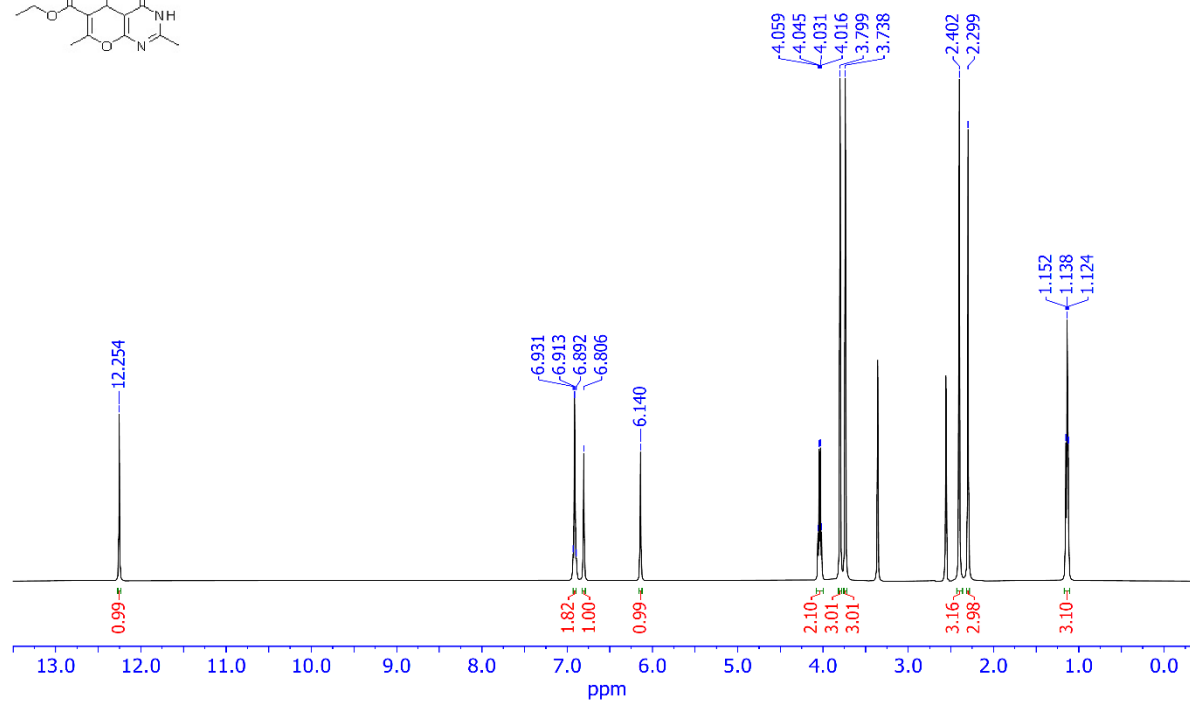

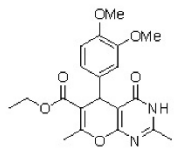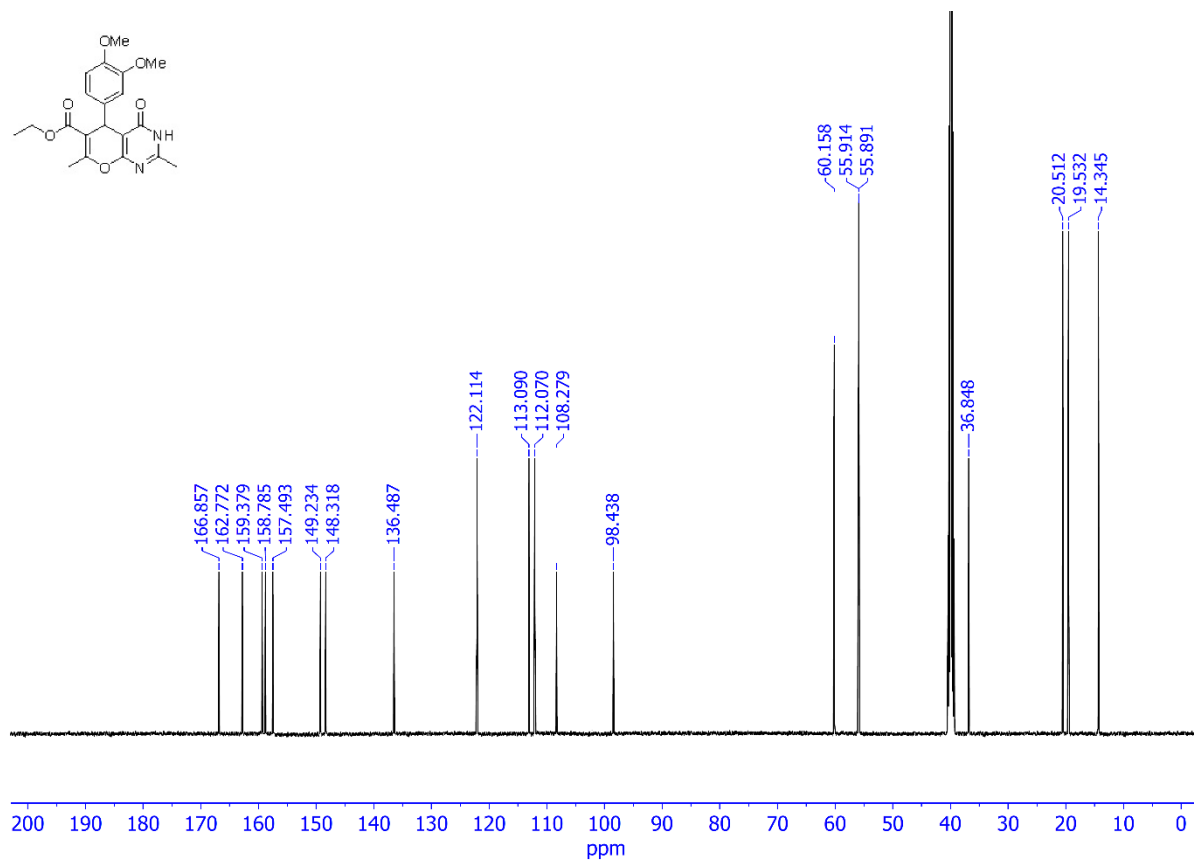

*Ethyl 2,7-dimethyl-5-(3,5-dimethoxyphenyl)-4-oxo-3,5-dihydro-4H-pyrano[2,3-d]pyrimidine-6-carboxylates (5n)*

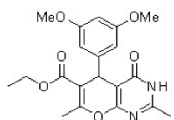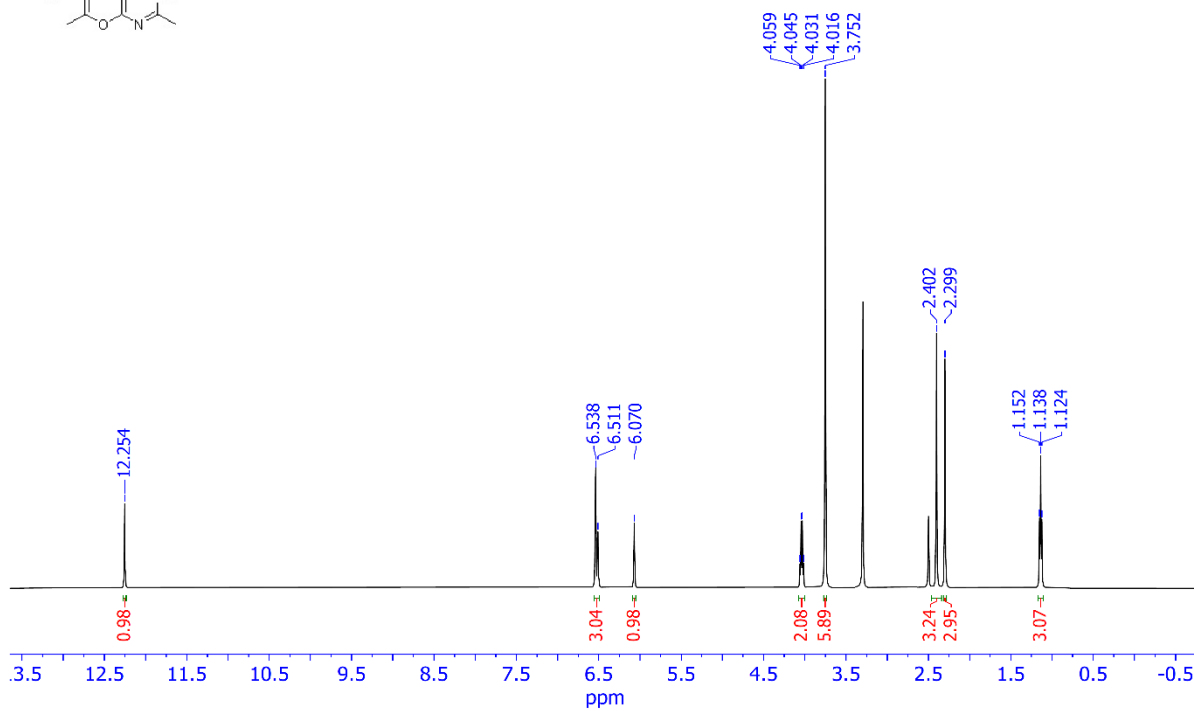

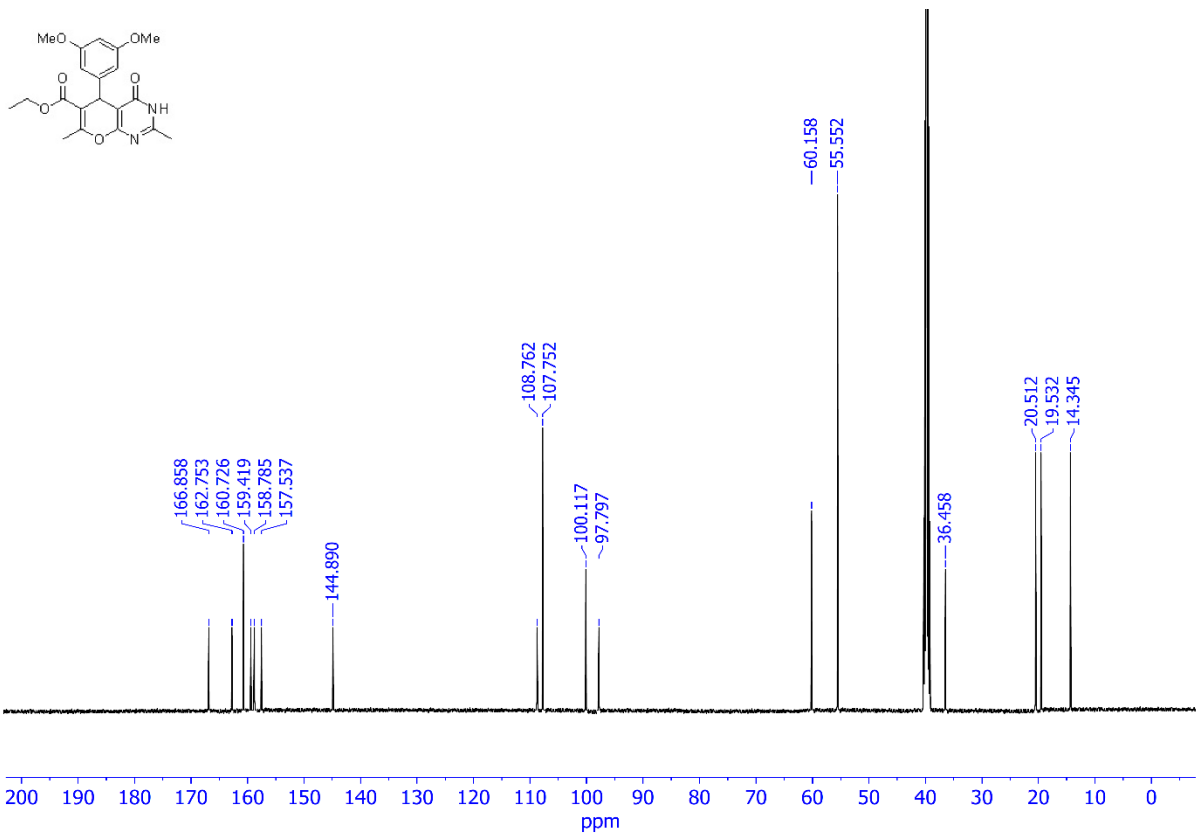

*Ethyl 2,7-dimethyl-5-(4-hydroxy-3-methoxyphenyl)-4-oxo-3,5-dihydro-4H-pyrano[2,3-d]pyrimidine-6-carboxylates (**50**)*

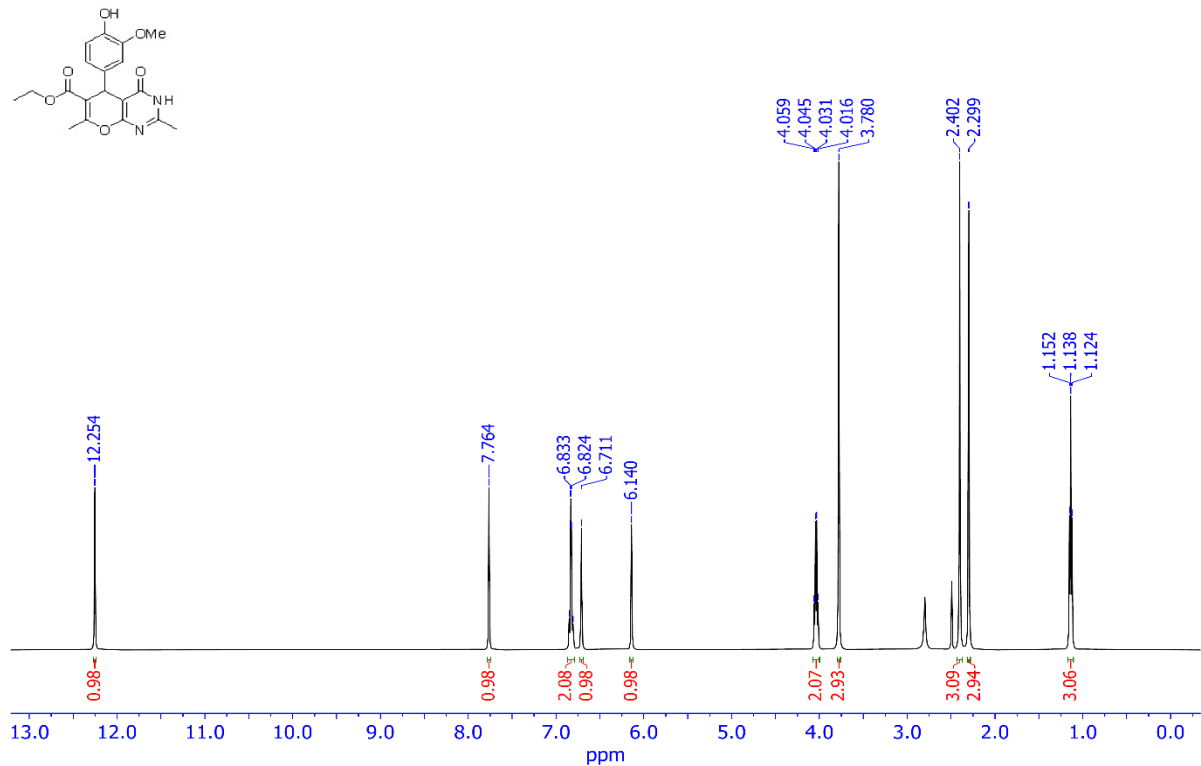

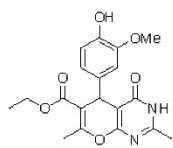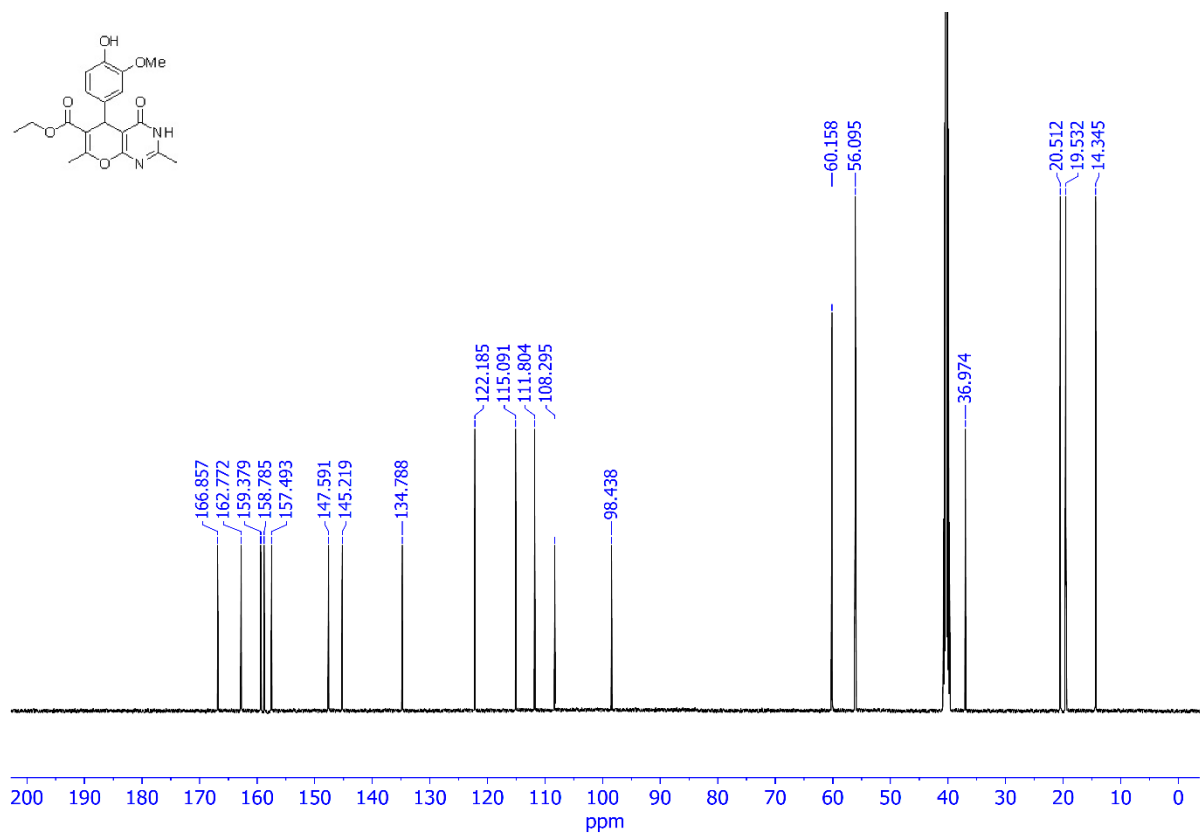

Ethyl 2,7-dimethyl-5-(4-dimethylaminophenyl)-4-oxo-3,5-dihydro-4H-pyrano[2,3-d]pyrimidine-6-carboxylates (**5p**)

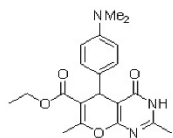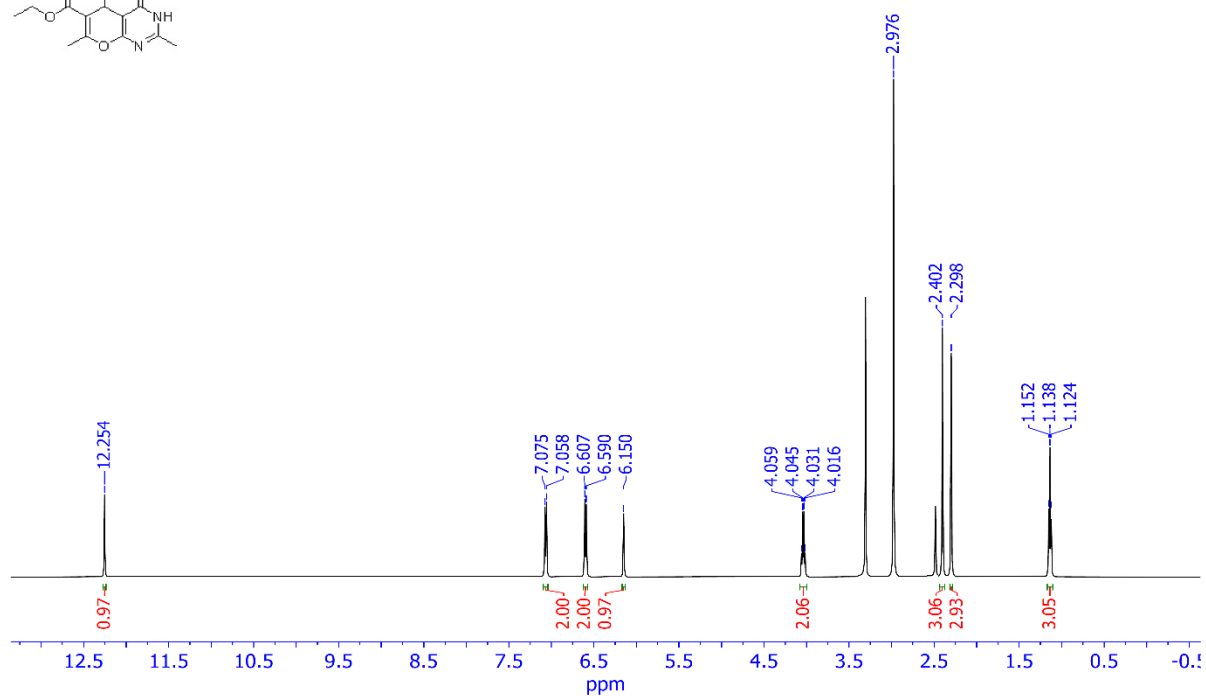

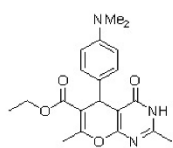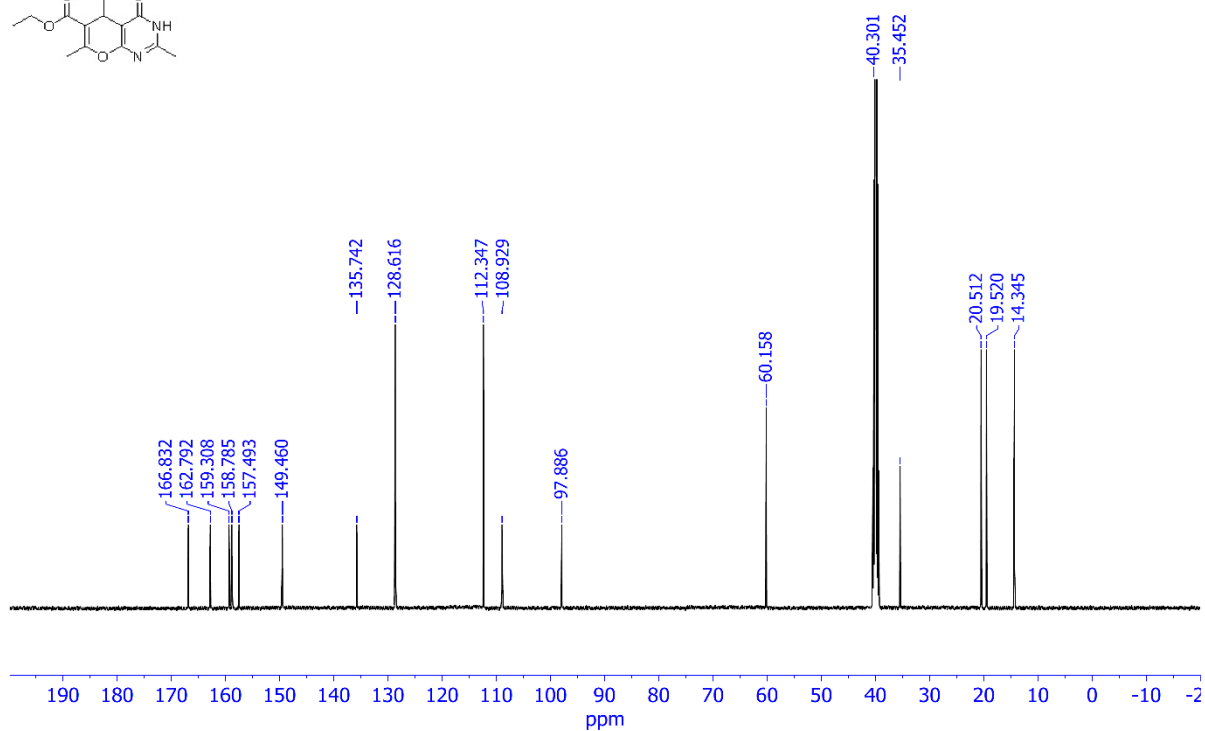

## 5. NMR and selected mass spectra of compounds 6a-6p

*Ethyl 2,7-dimethyl-5-phenyl-4-oxo-3-propargyl-3,5-dihydro-4H-pyrano[2,3-d]pyrimidine-6-carboxylates (6a)*

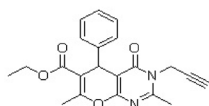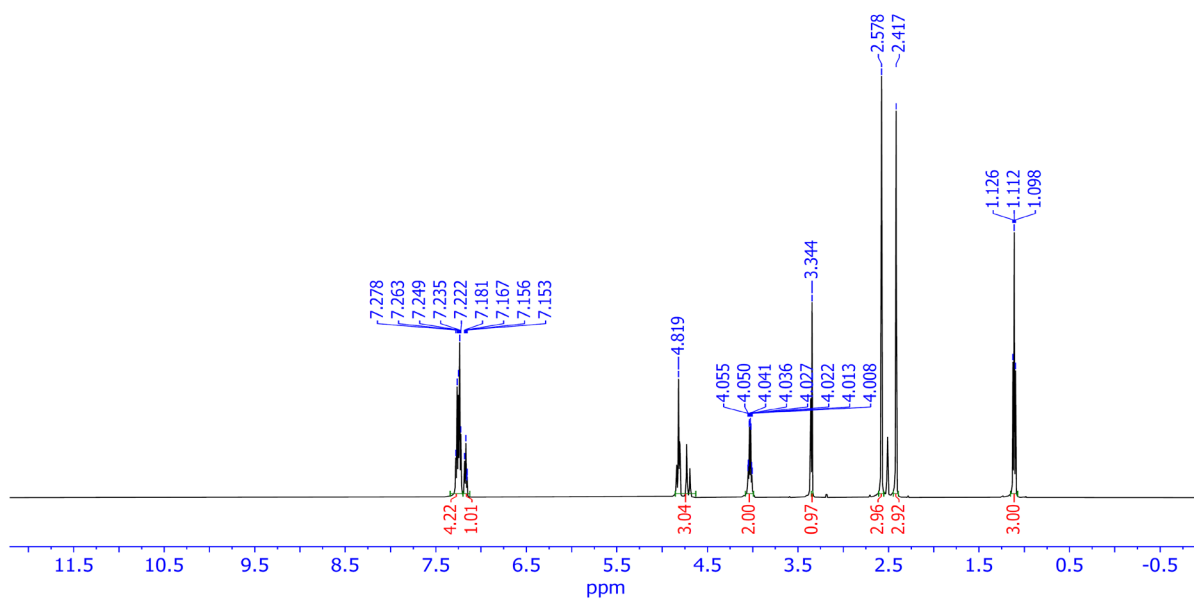

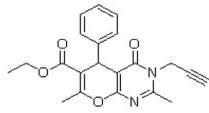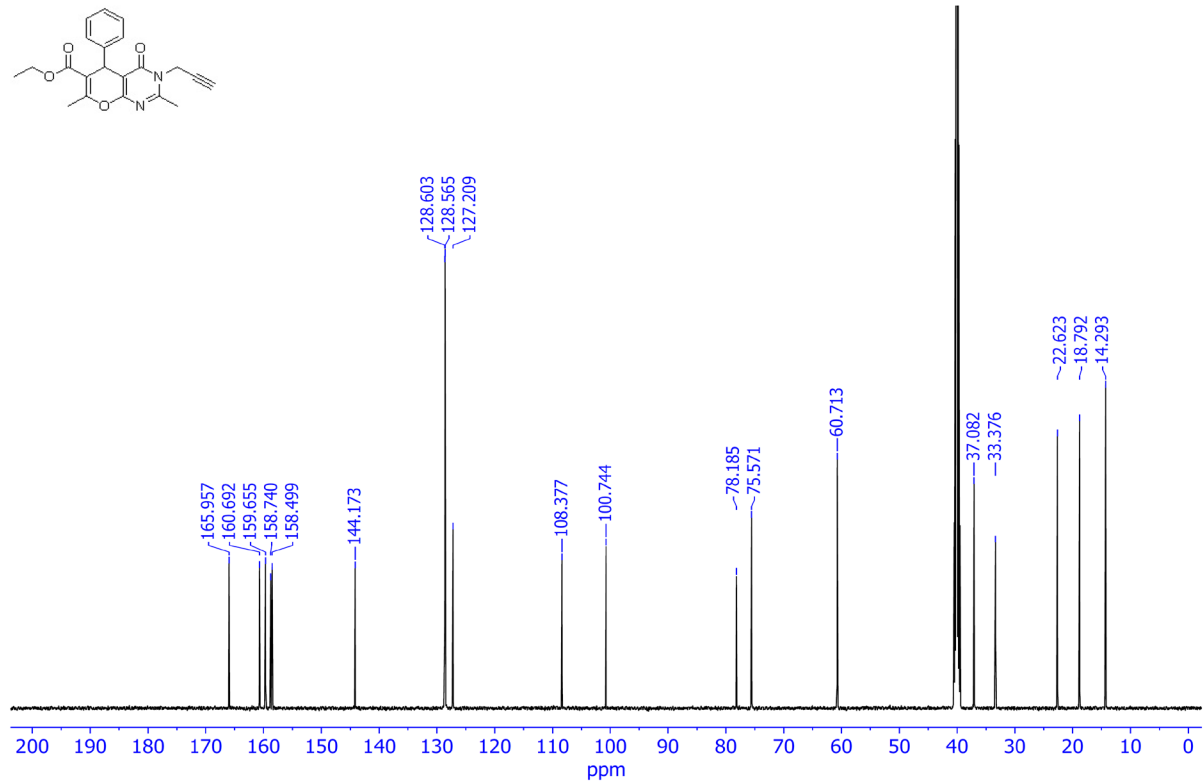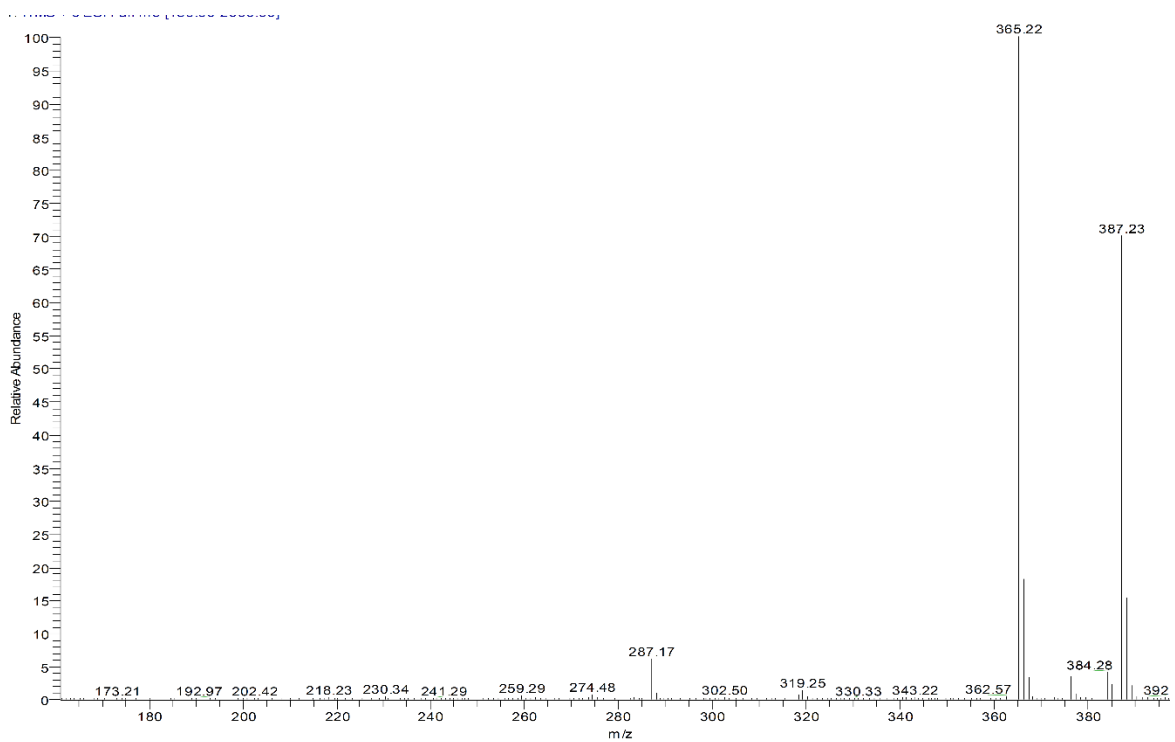

*Ethyl 2,7-dimethyl-5-(4-nitrophenyl)-4-oxo-3-propargyl-3,5-dihydro-4H-pyrano[2,3-d]pyrimidine-6-carboxylates (6b)*

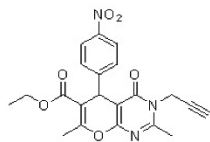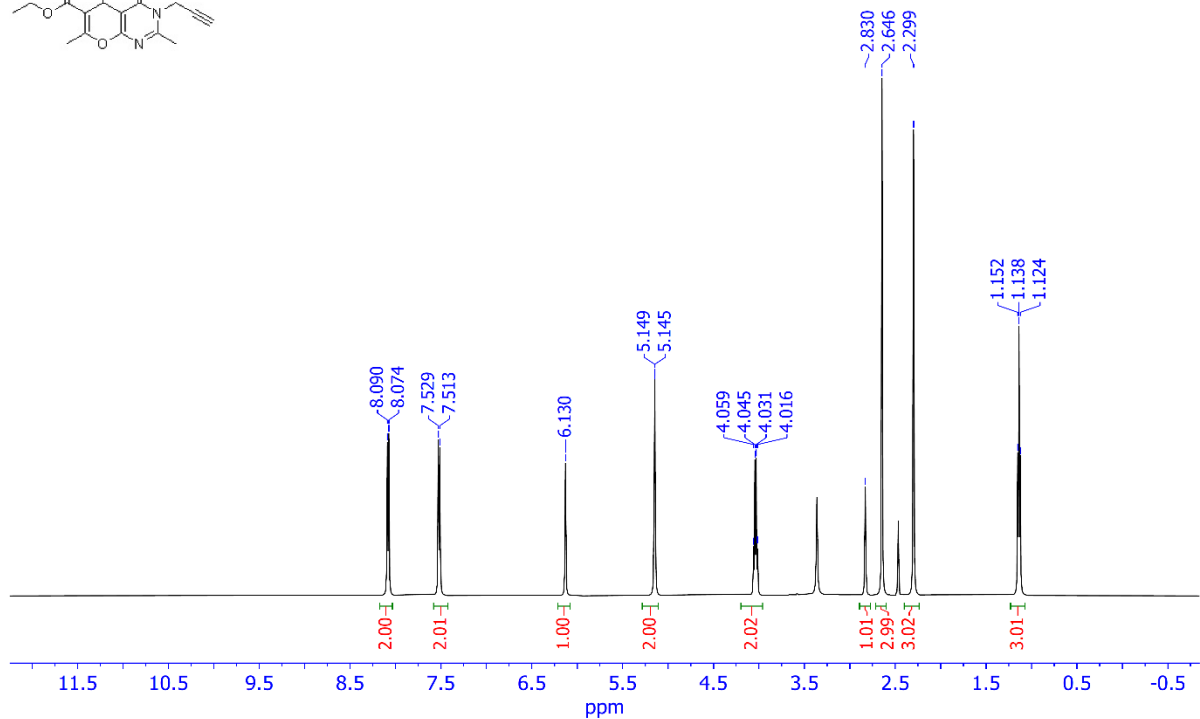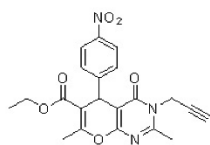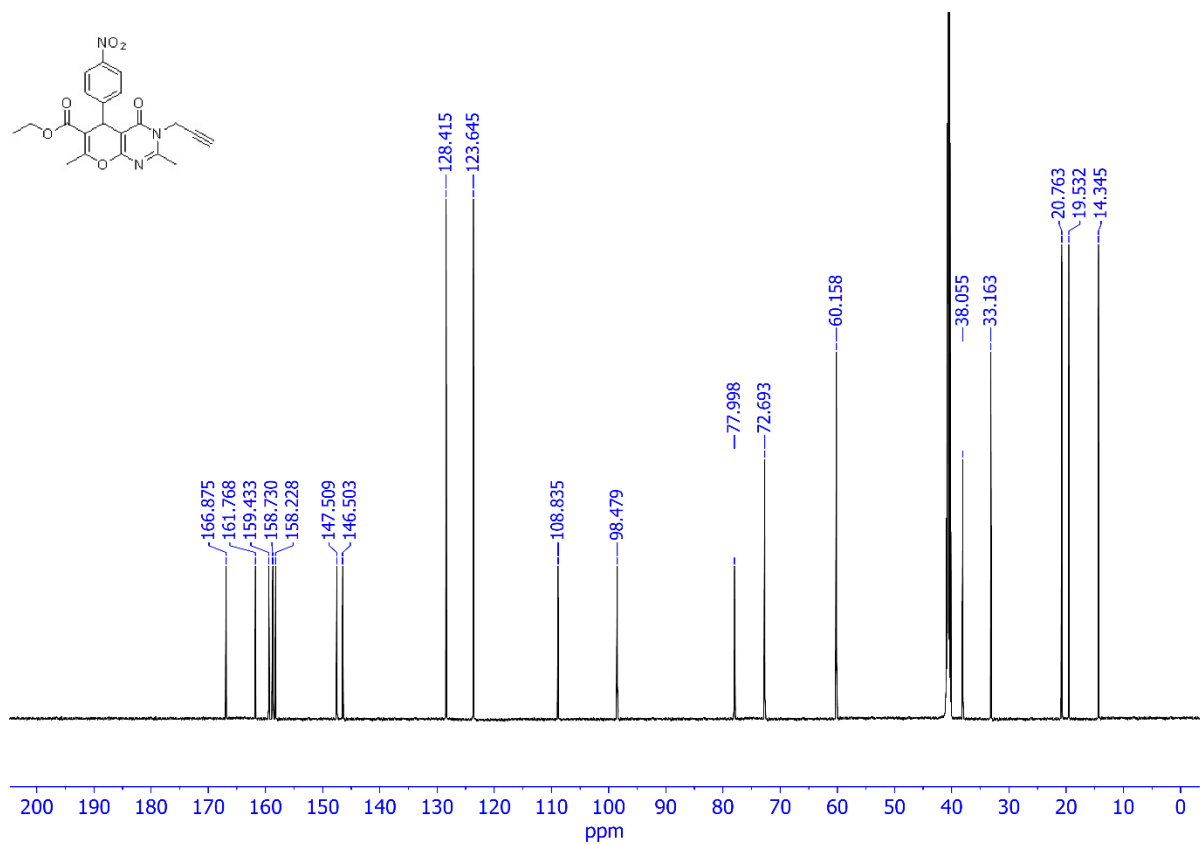

*Ethyl 2,7-dimethyl-5-(4-chlorophenyl)-4-oxo-3-propargyl-3,5-dihydro-4H-pyrano[2,3-d]pyrimidine-6-carboxylates (6d)*

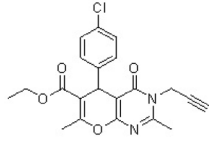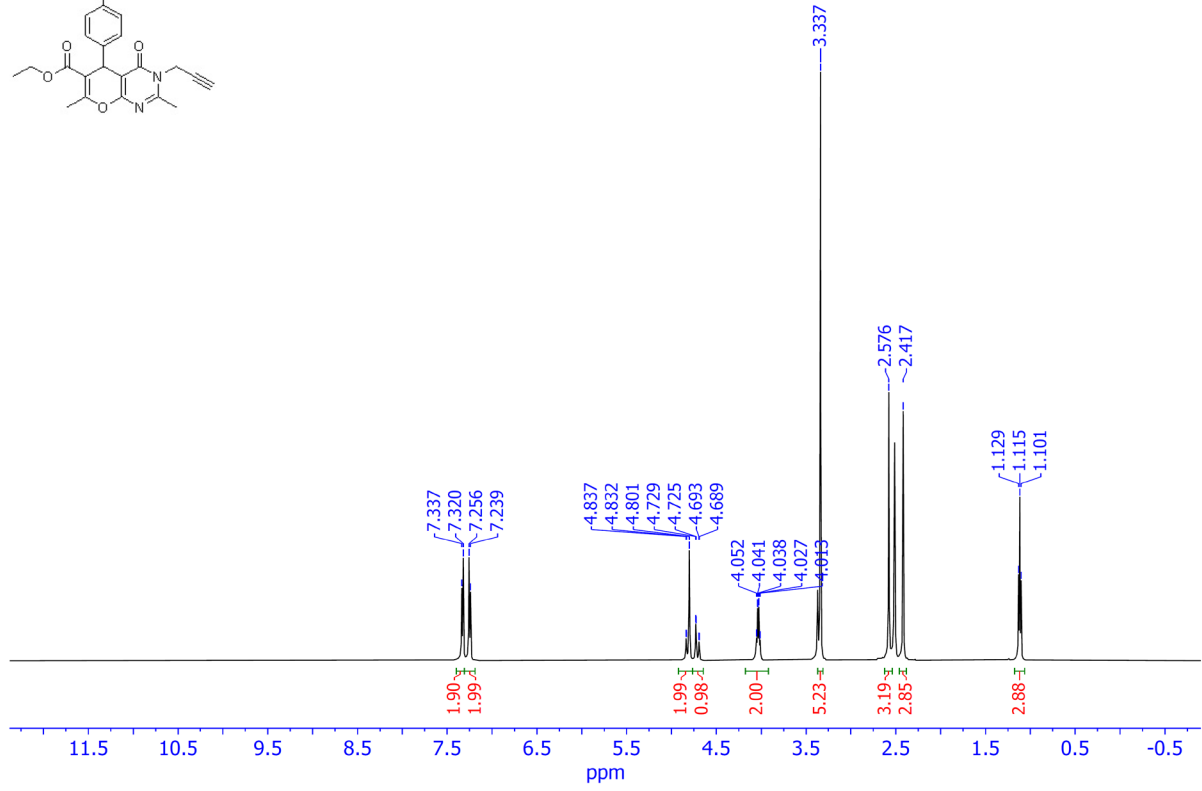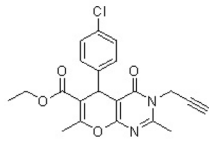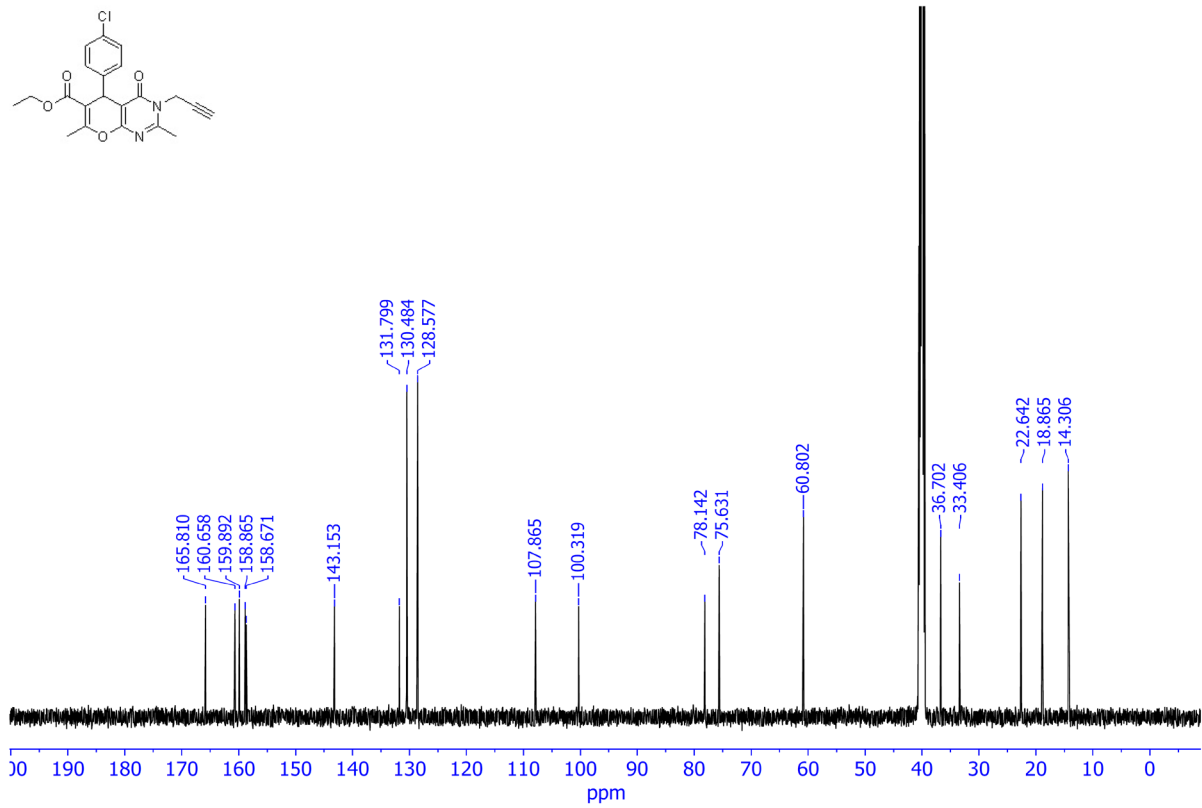



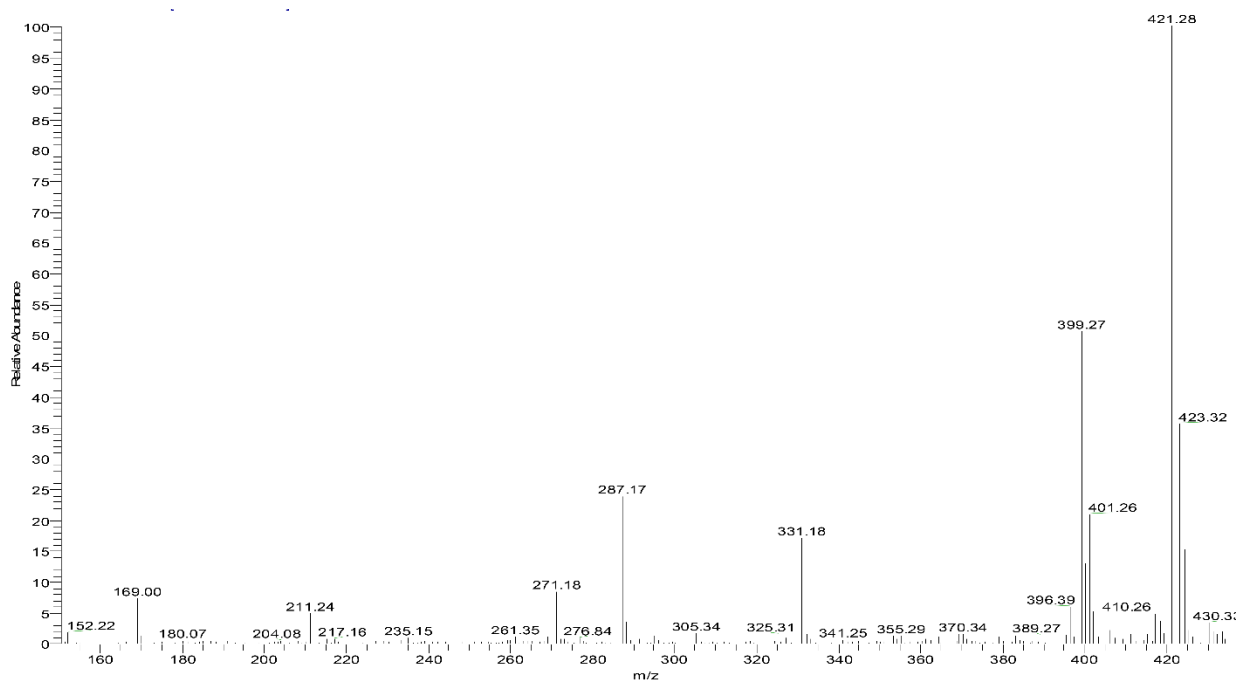

*Ethyl 2,7-dimethyl-5-(4-bromophenyl)-4-oxo-3-propargyl-3,5-dihydro-4H-pyrano[2,3-d]pyrimidine-6-carboxylates (6f)*

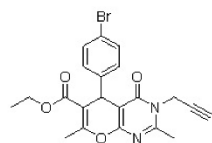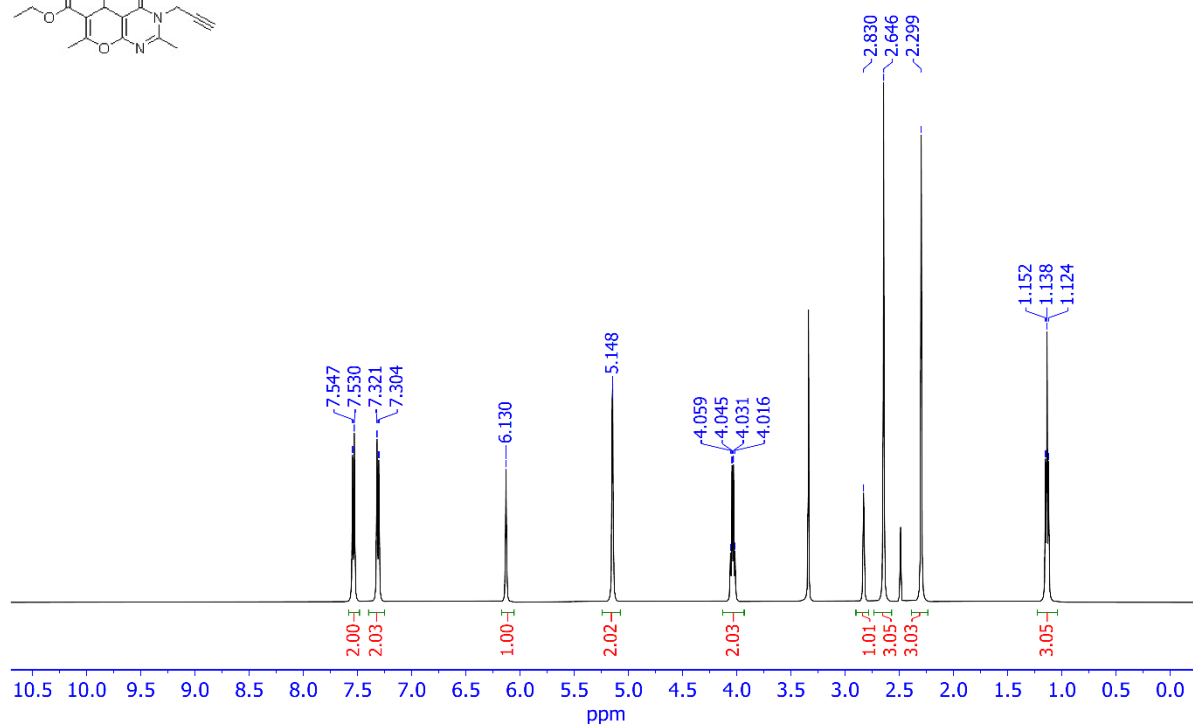

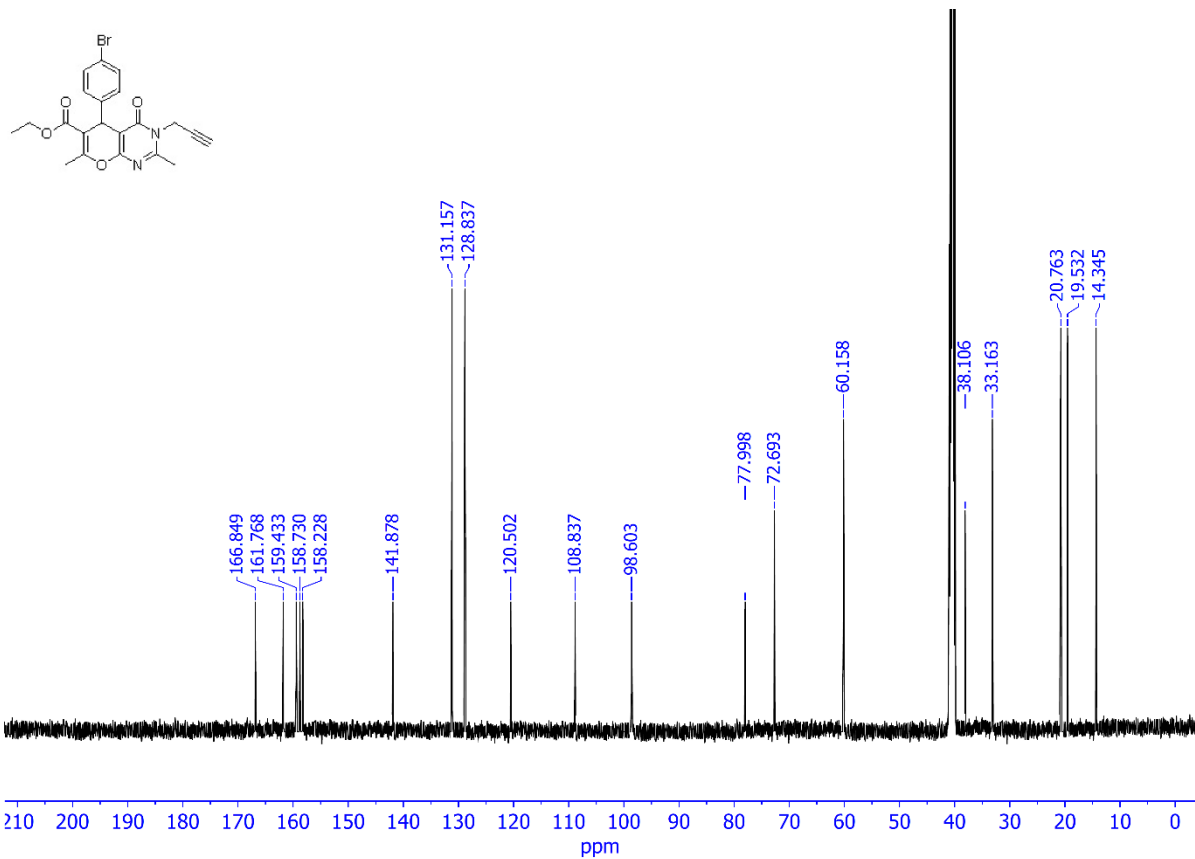

Ethyl 2,7-dimethyl-5-(4-hydroxyphenyl)-4-oxo-3-propargyl-3,5-dihydro-4H-pyrano[2,3-d]pyrimidine-6-carboxylates (**6i**)

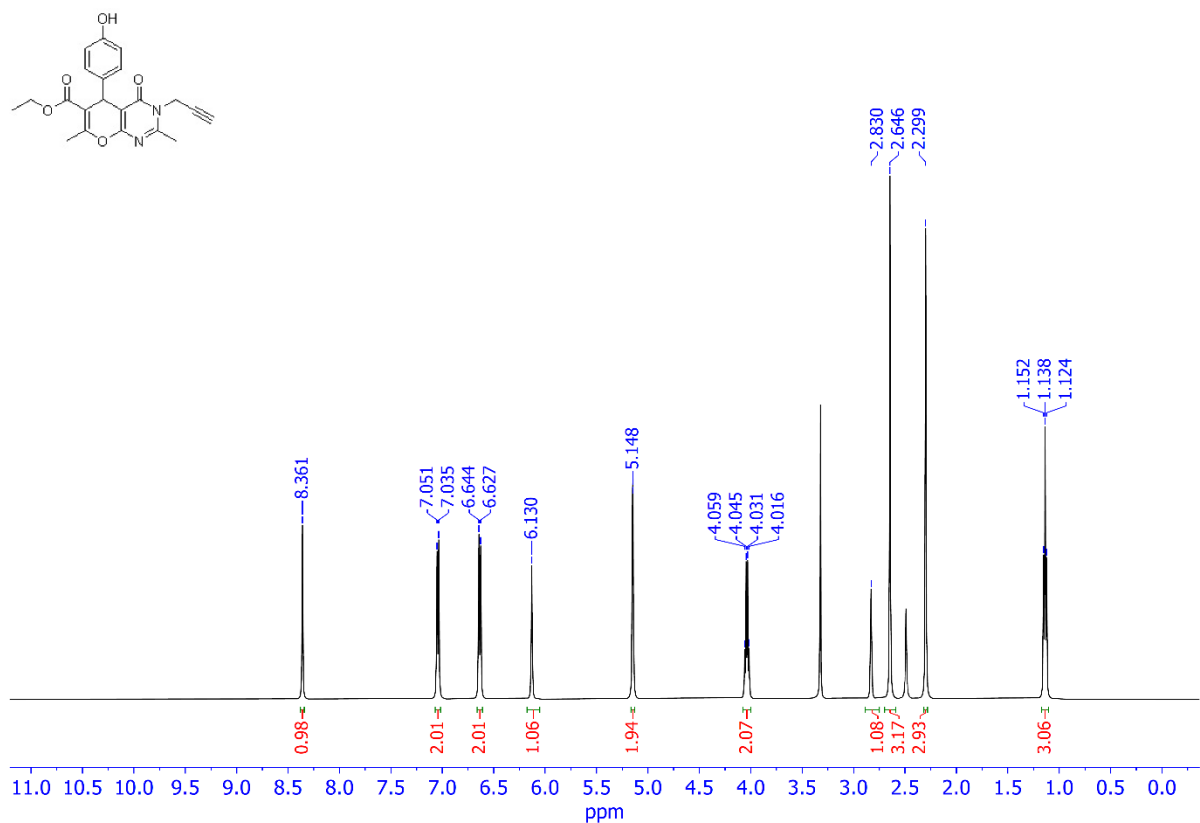

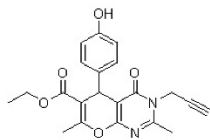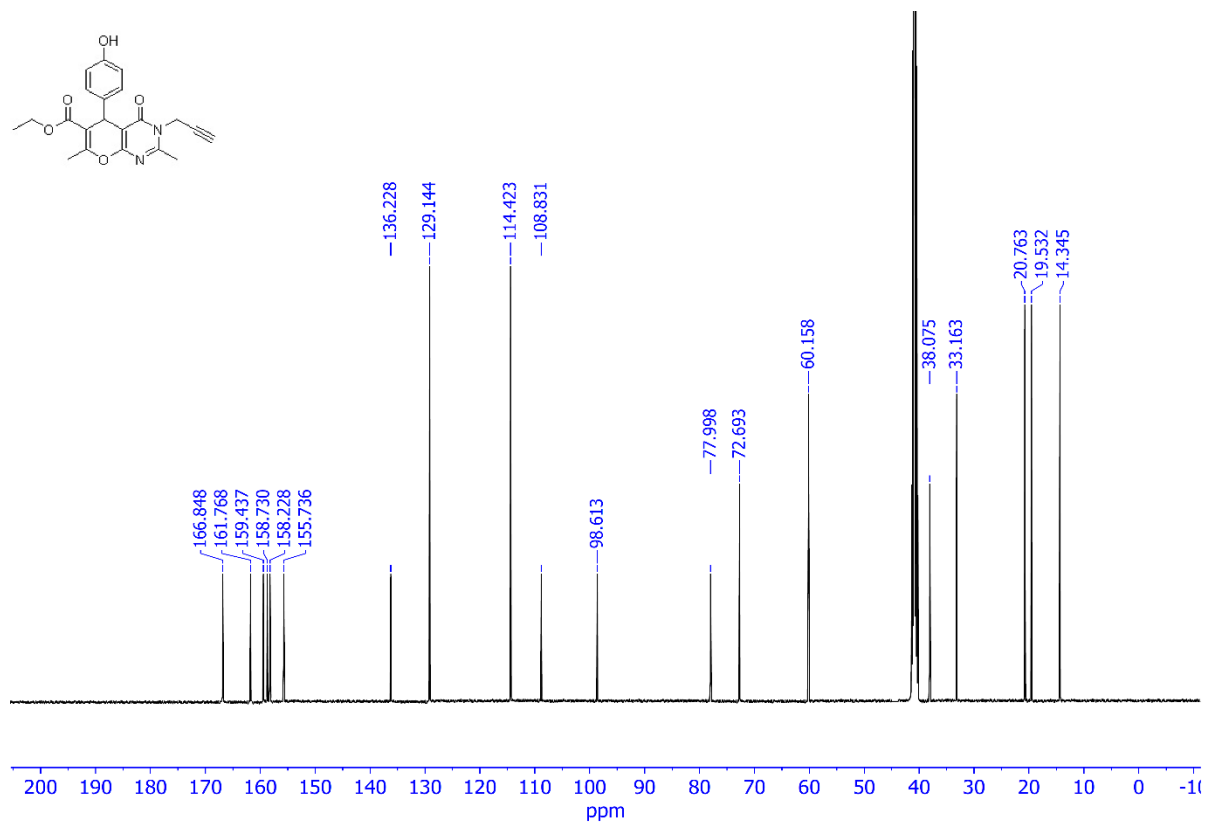

*Ethyl 2,7-dimethyl-5-(4-methoxyphenyl)-4-oxo-3-propargyl-3,5-dihydro-4H-pyrano[2,3-d]pyrimidine-6-carboxylates (6k)*

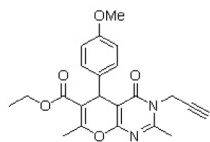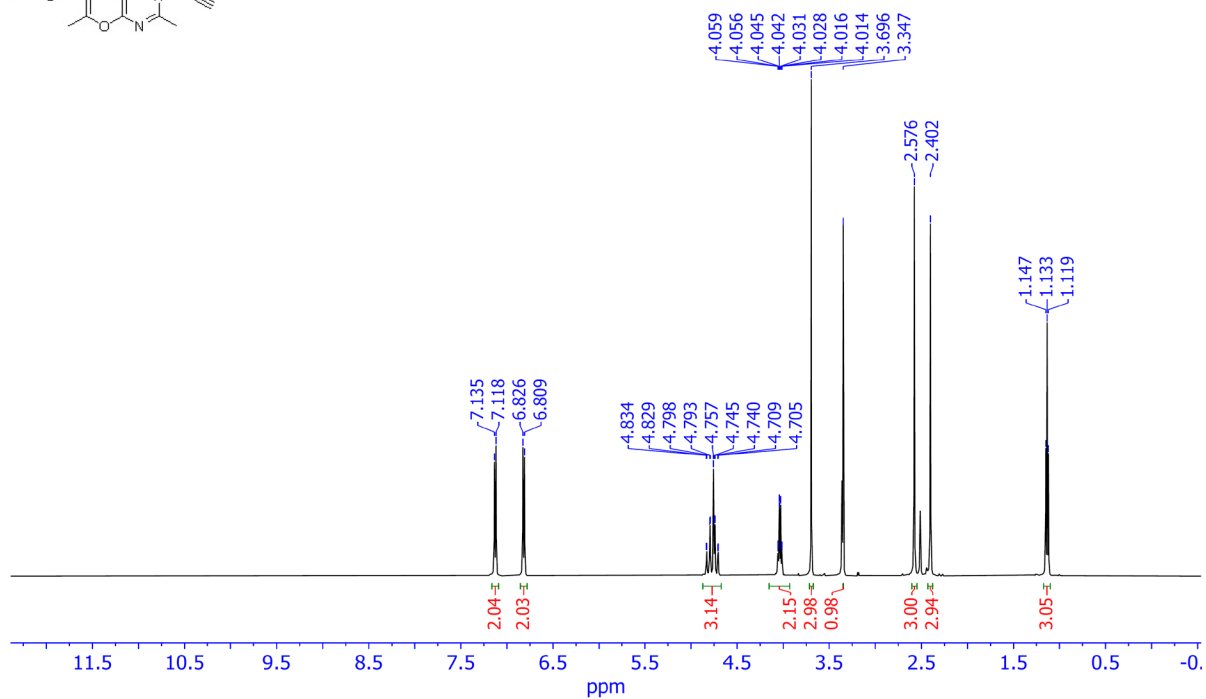

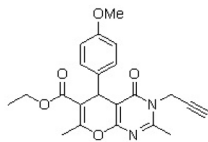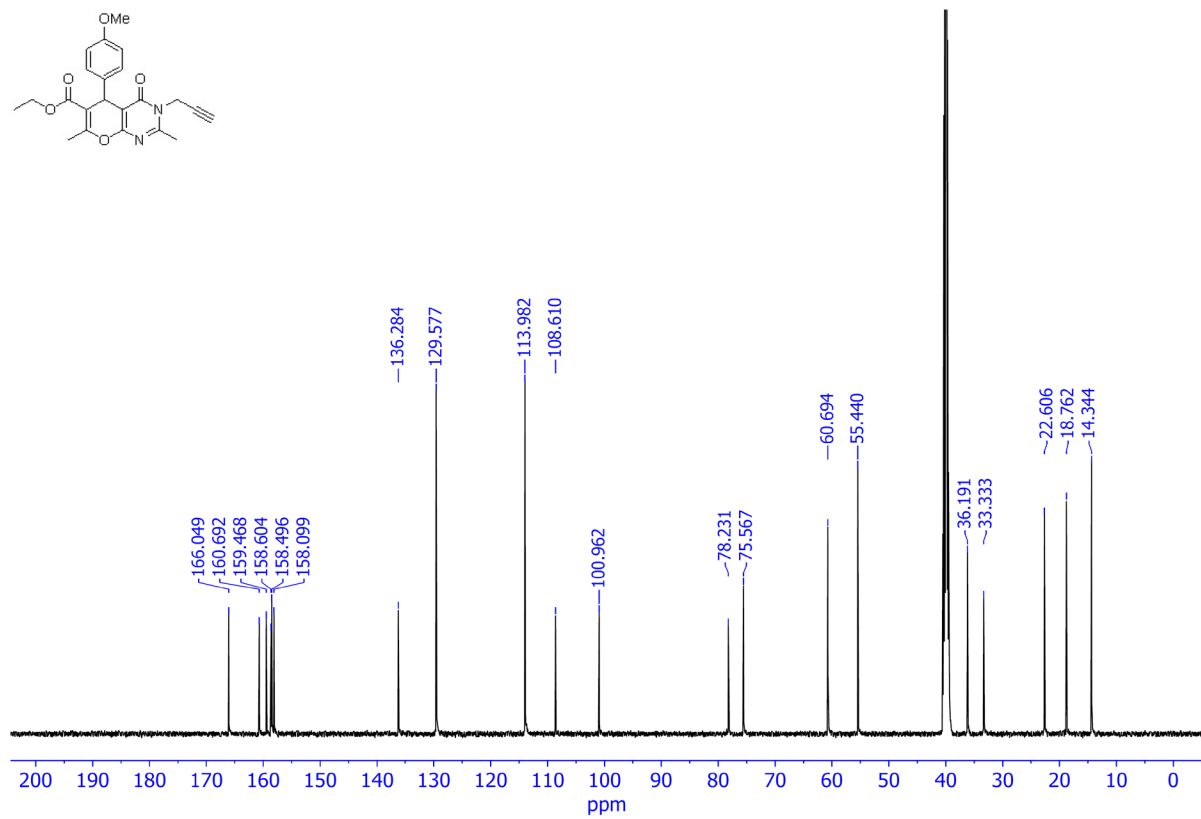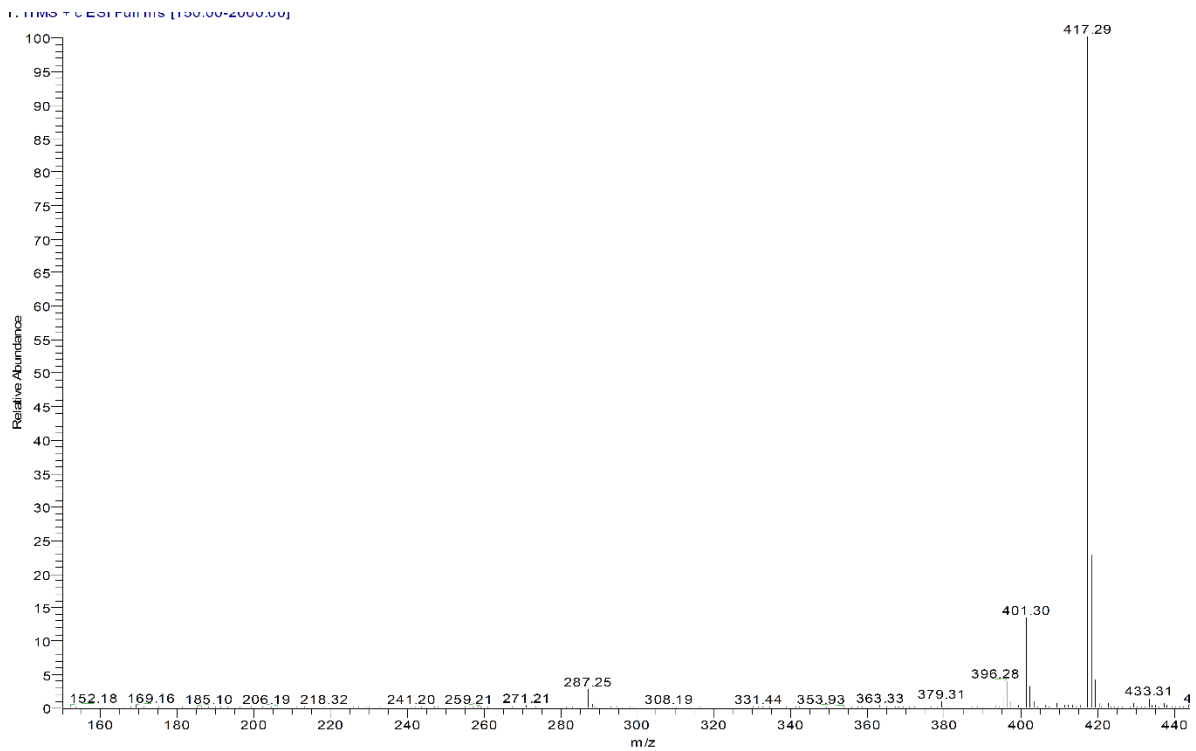

*Ethyl 2,7-dimethyl-5-(3,4-dimethoxyphenyl)-4-oxo-3-propargyl-3,5-dihydro-4H-pyrano[2,3-d]pyrimidine-6-carboxylates (6m)*

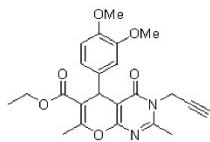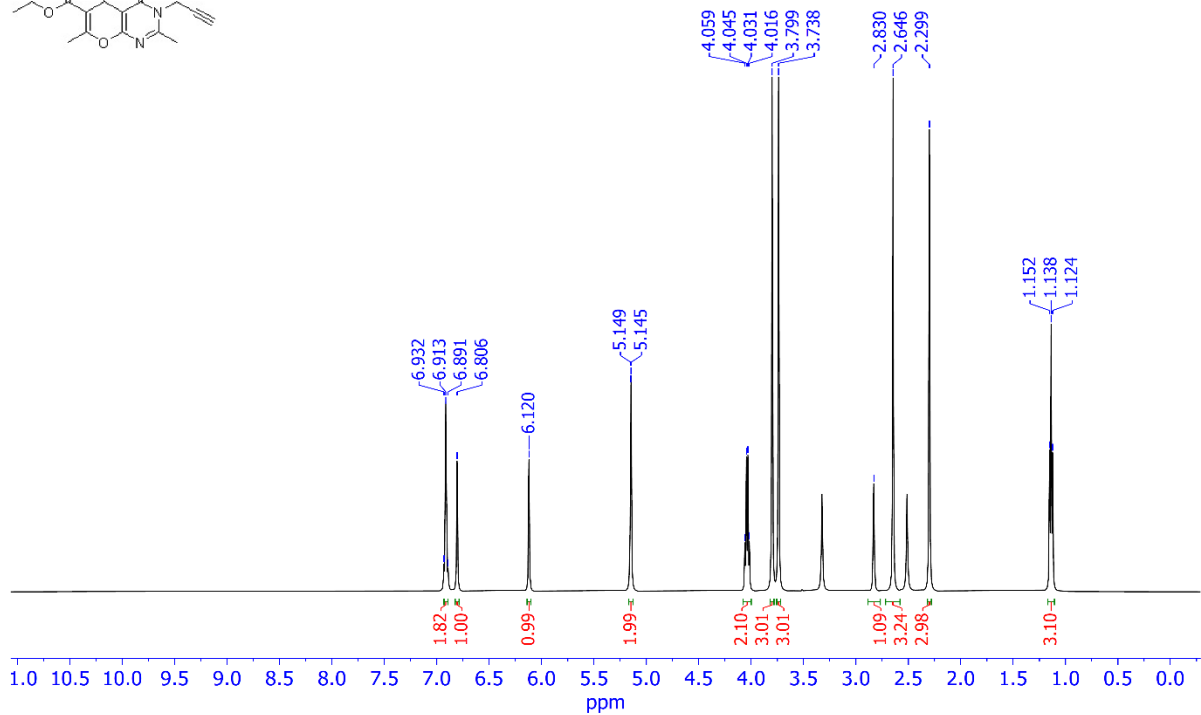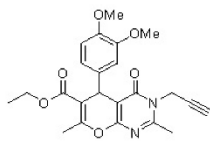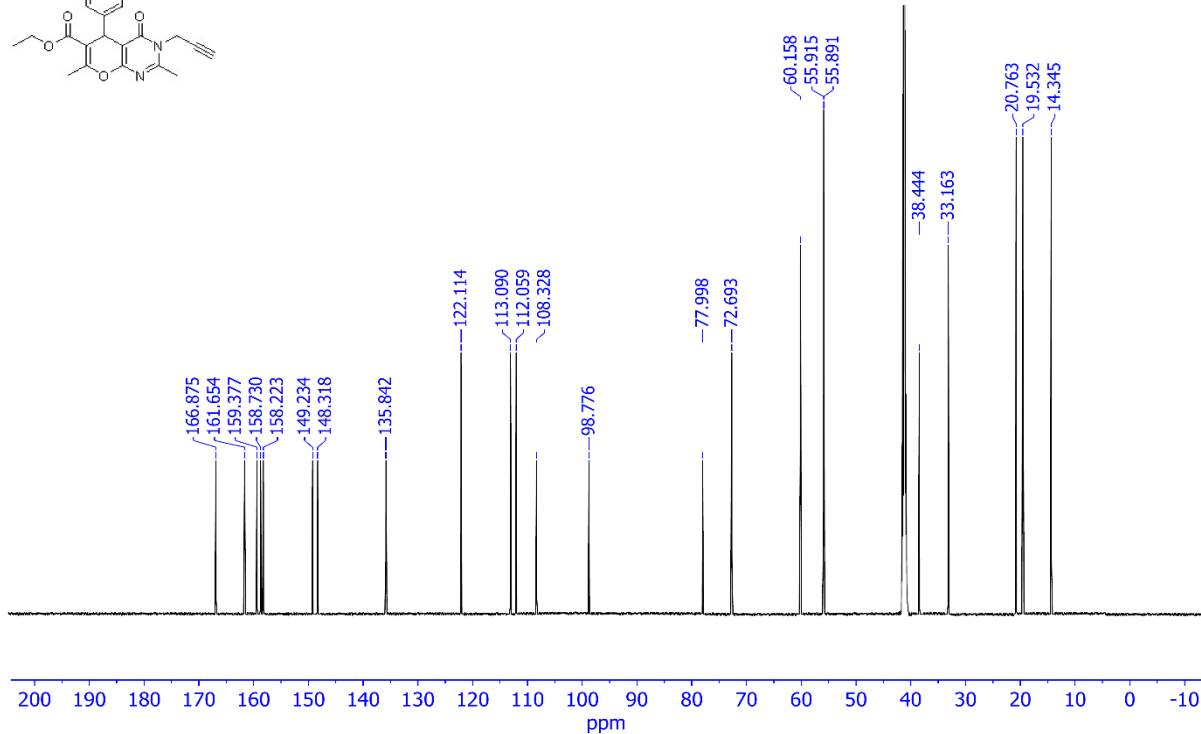

*Ethyl 2,7-dimethyl-5-(3,5-dimethoxyphenyl)-4-oxo-3-propargyl-3,5-dihydro-4H-pyrano[2,3-d]pyrimidine-6-carboxylate (6n)*

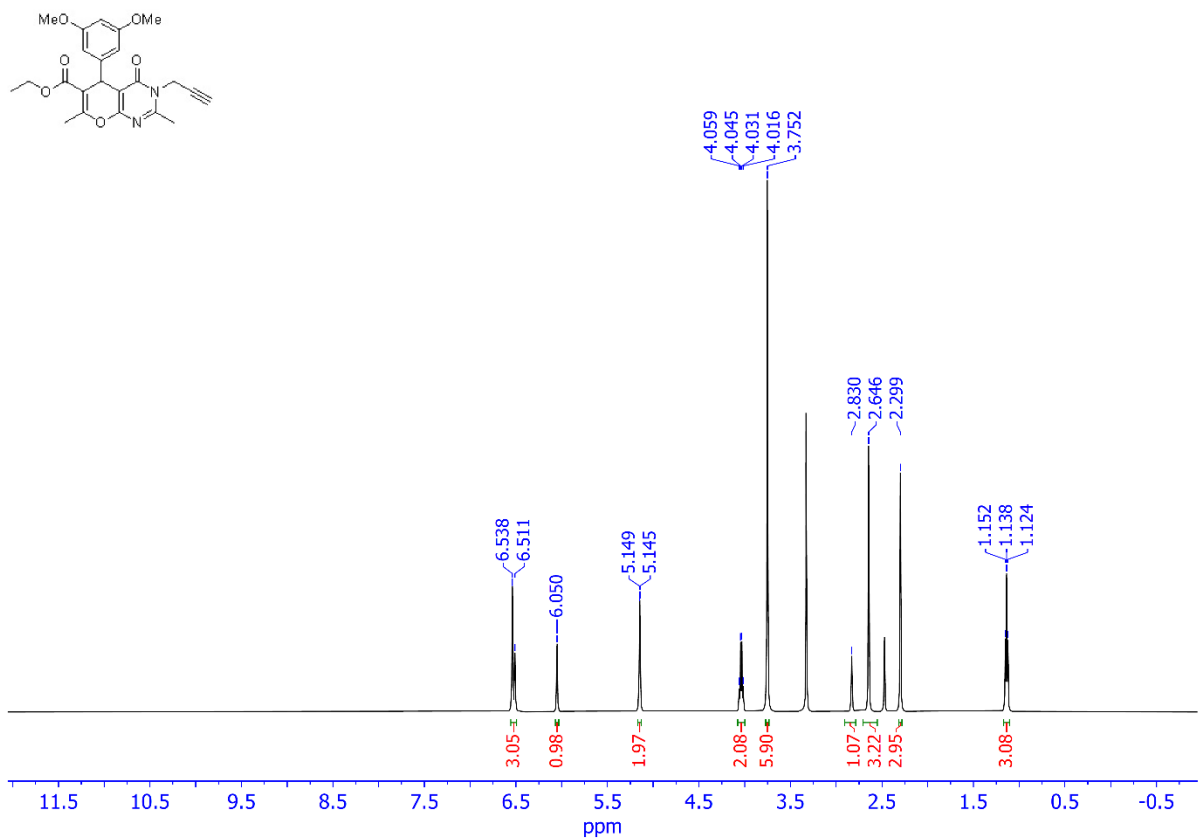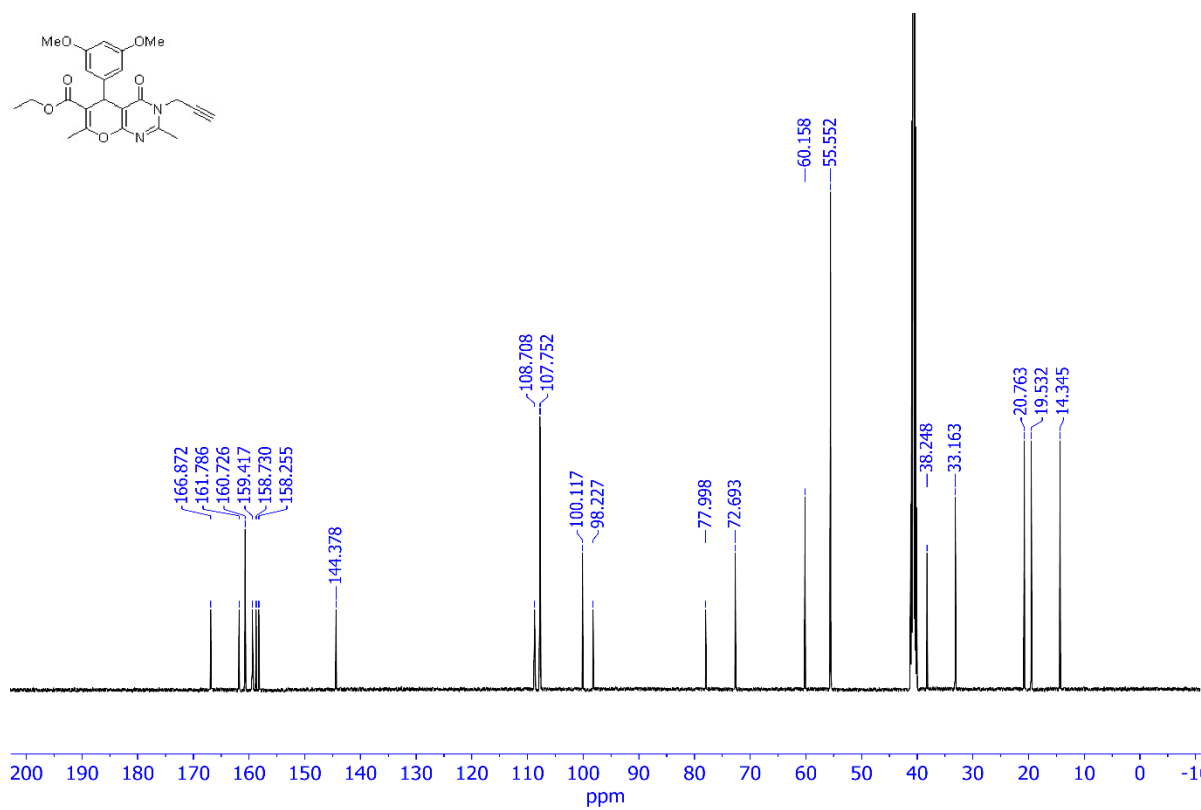

Ethyl 2,7-dimethyl-5-(4-hydroxy-3-methoxyphenyl)-4-oxo-3-propargyl-3,5-dihydro-4H-pyrano[2,3-d]pyrimidine-6-carboxylates (**60**)

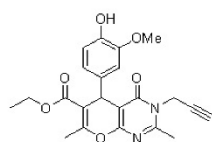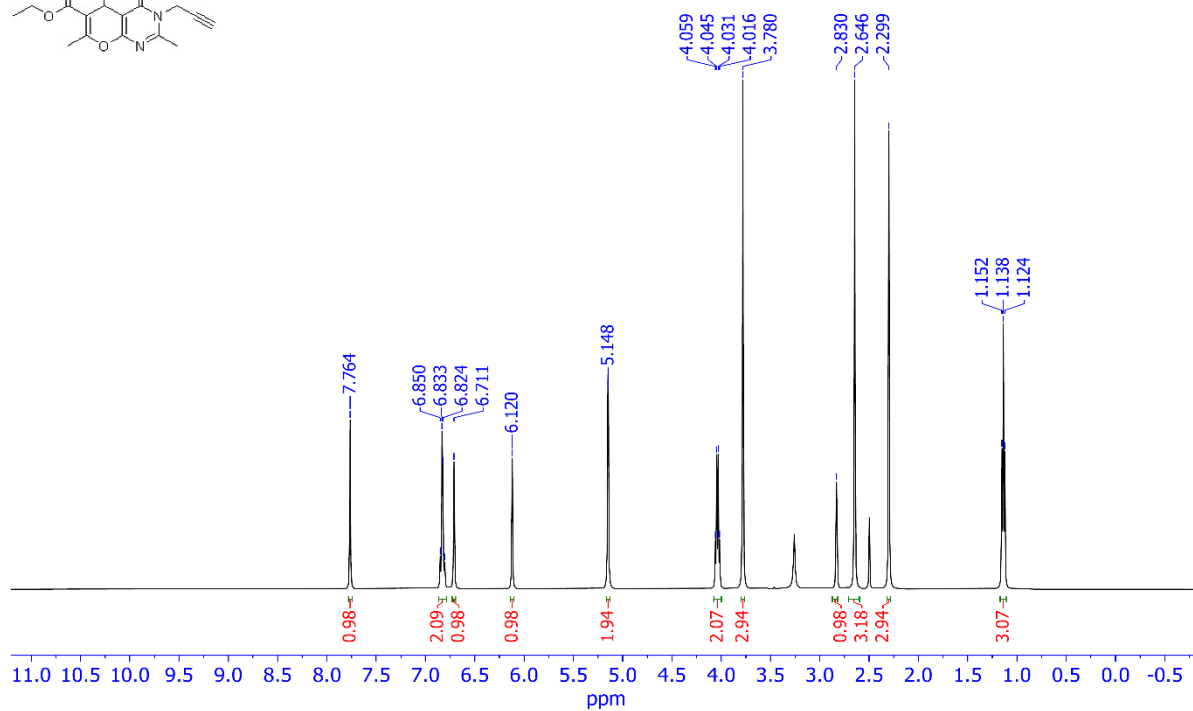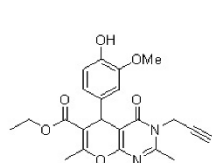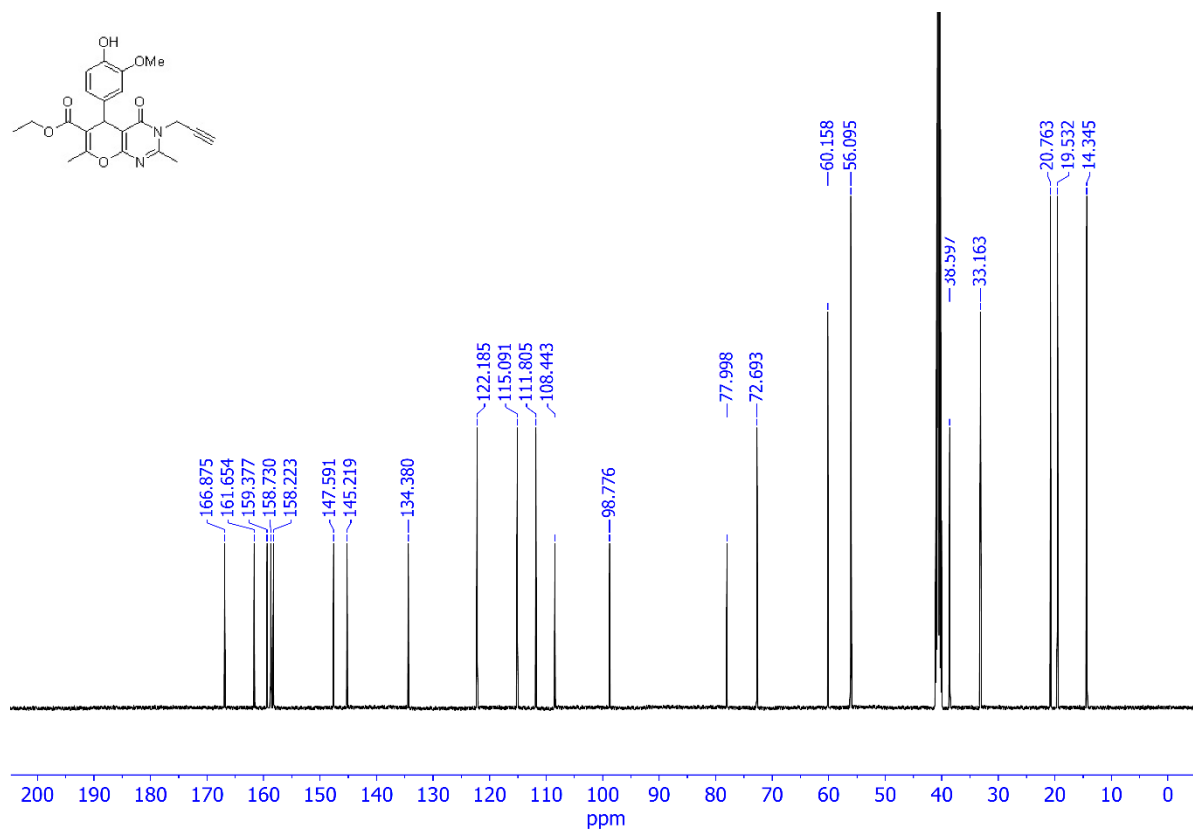

*Ethyl 2,7-dimethyl-5-(4-dimethylaminophenyl)-4-oxo-3-propargyl-3,5-dihydro-4H-pyrano[2,3-d]pyrimidine-6-carboxylates (6p)*

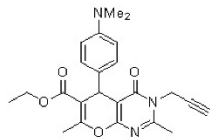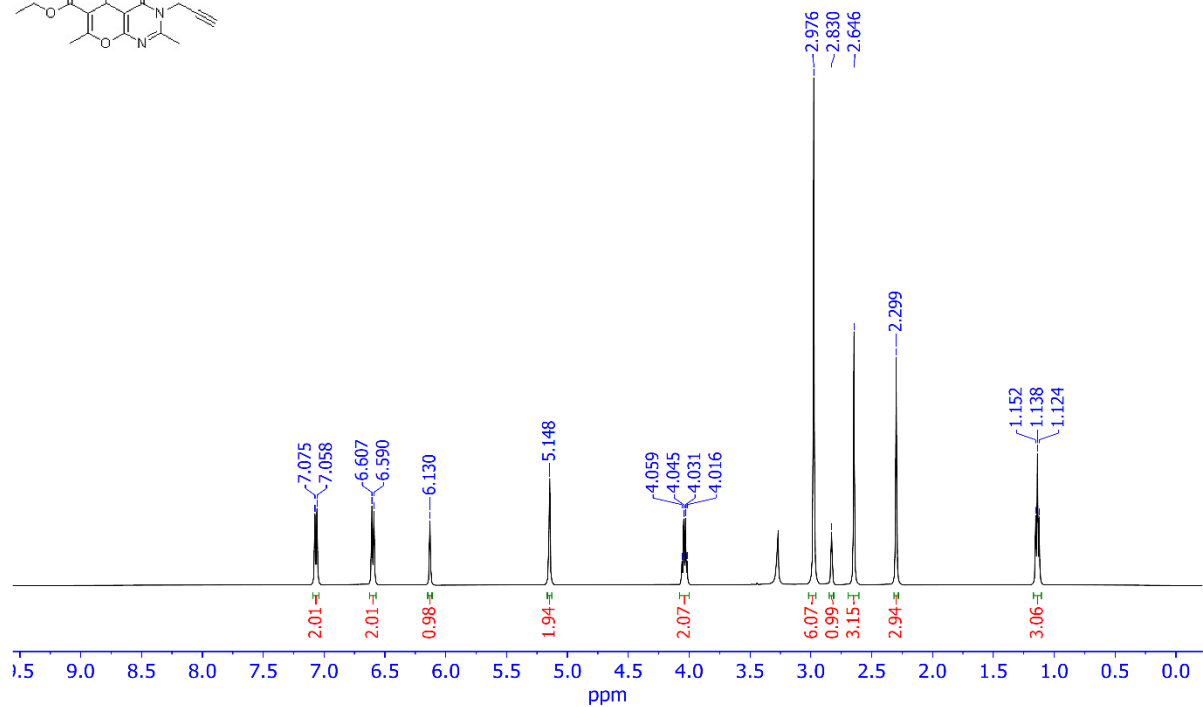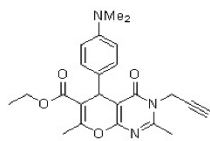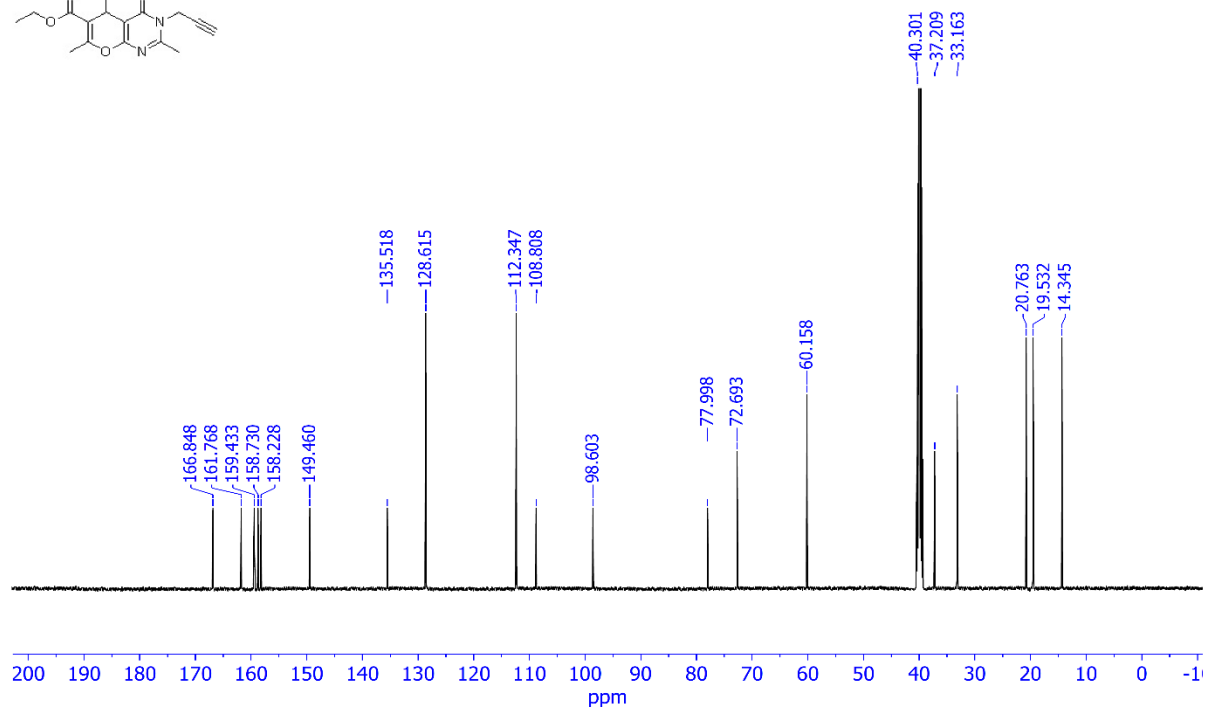

## 6. NMR and selected mass spectra of compounds 8a-8s

*Ethyl 3-(1-((2,3,4,6-tetra-O-acetyl- $\beta$ -D-glucopyranosyl))-1H-1,2,3-triazol-4-yl)methyl-2,7-dimethyl-5-phenyl-4-oxo-3,5-dihydro-4H-pyran[2,3-d]pyrimidin-6-carboxylate (8a)*



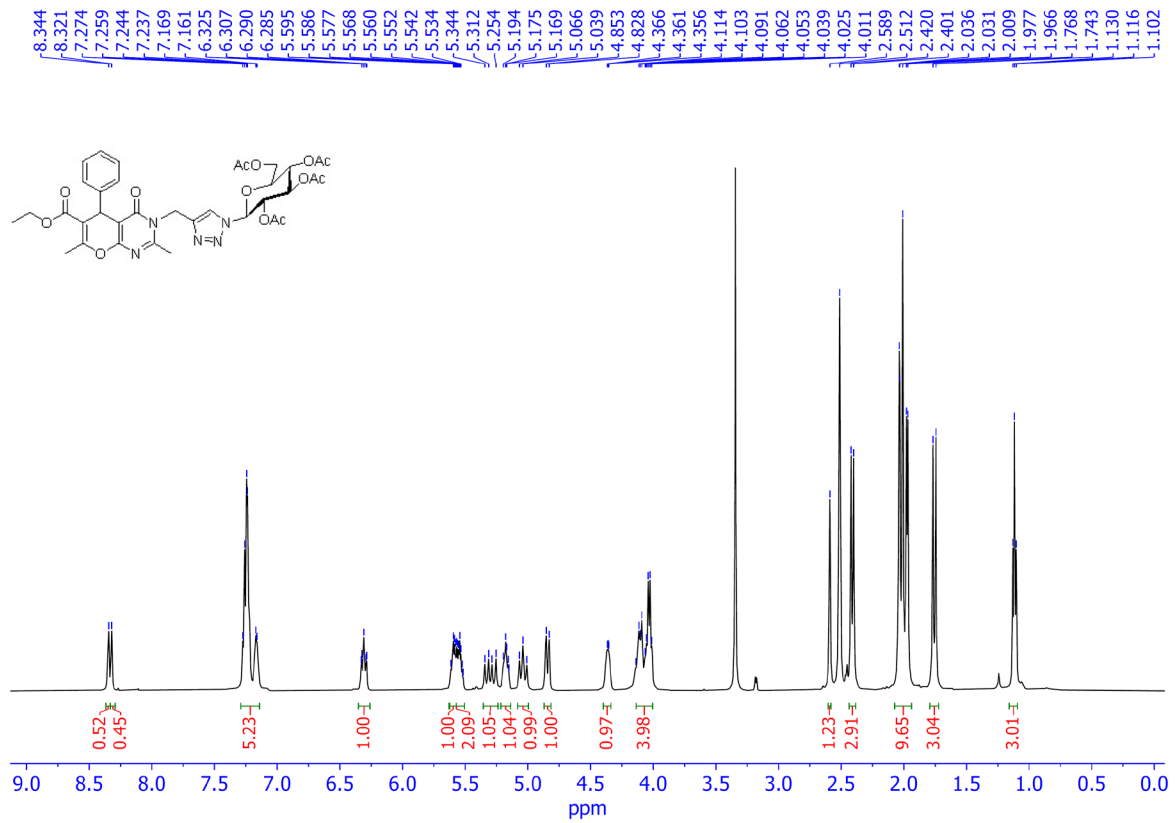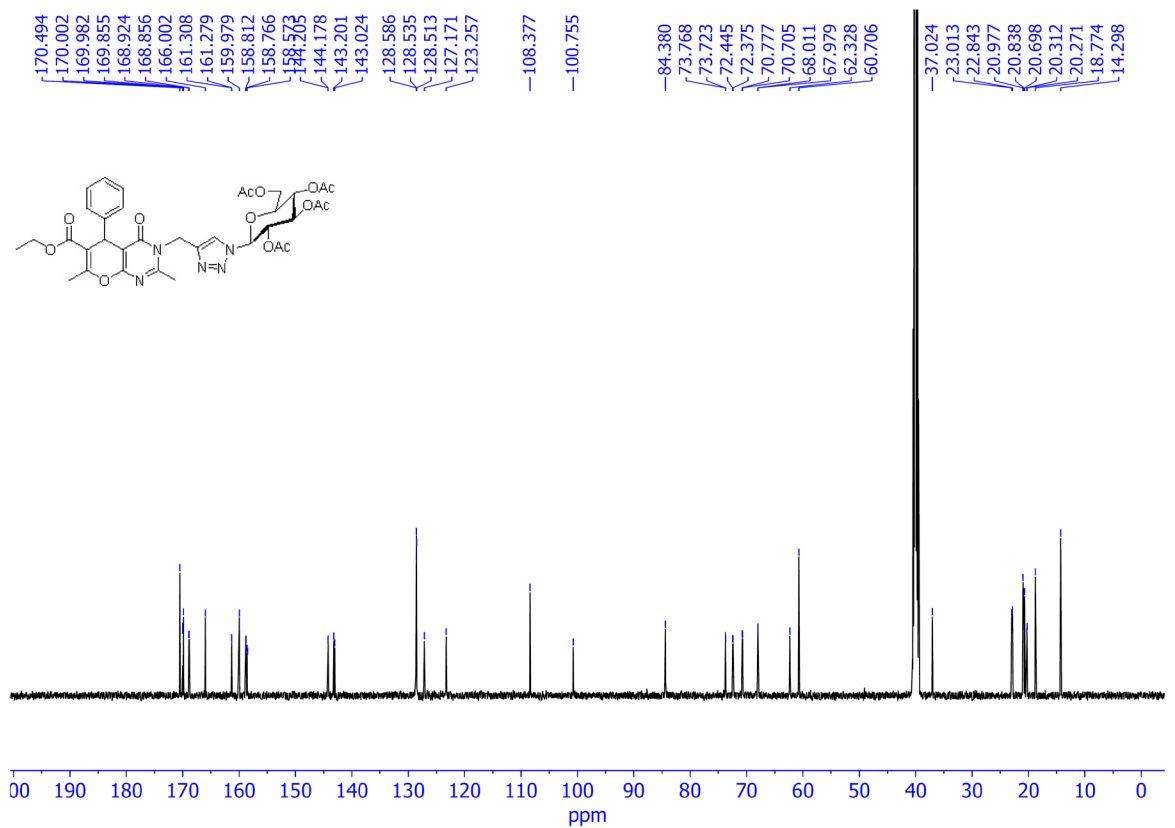

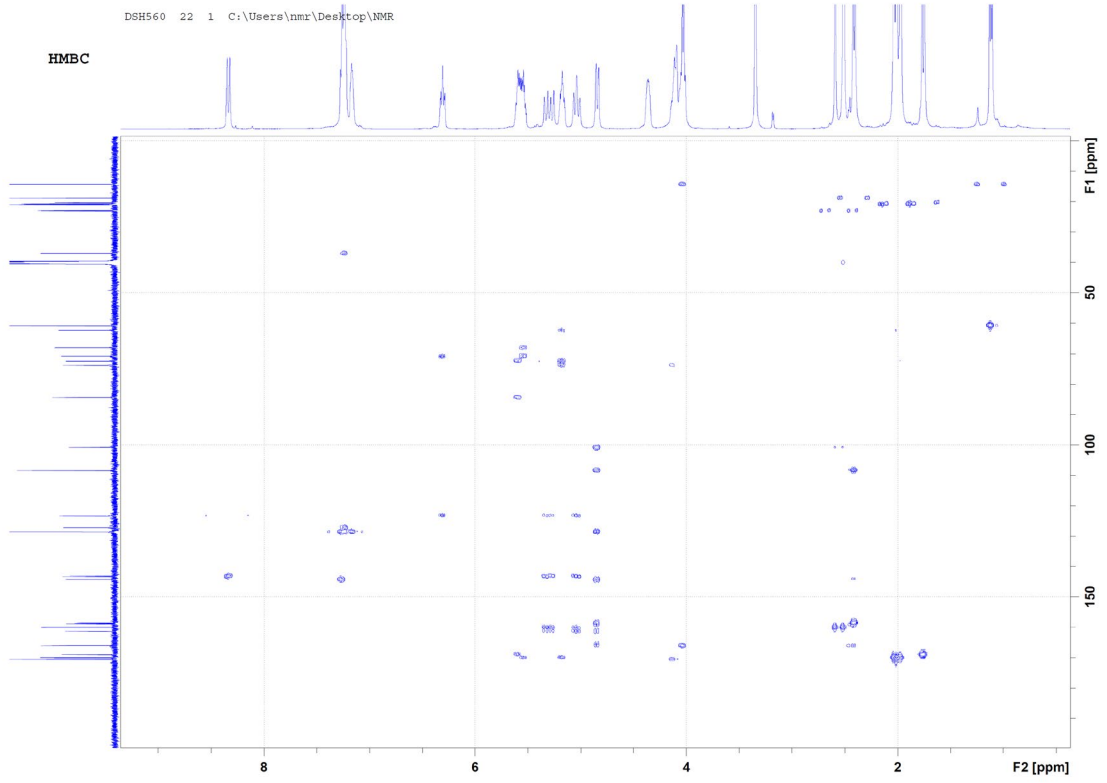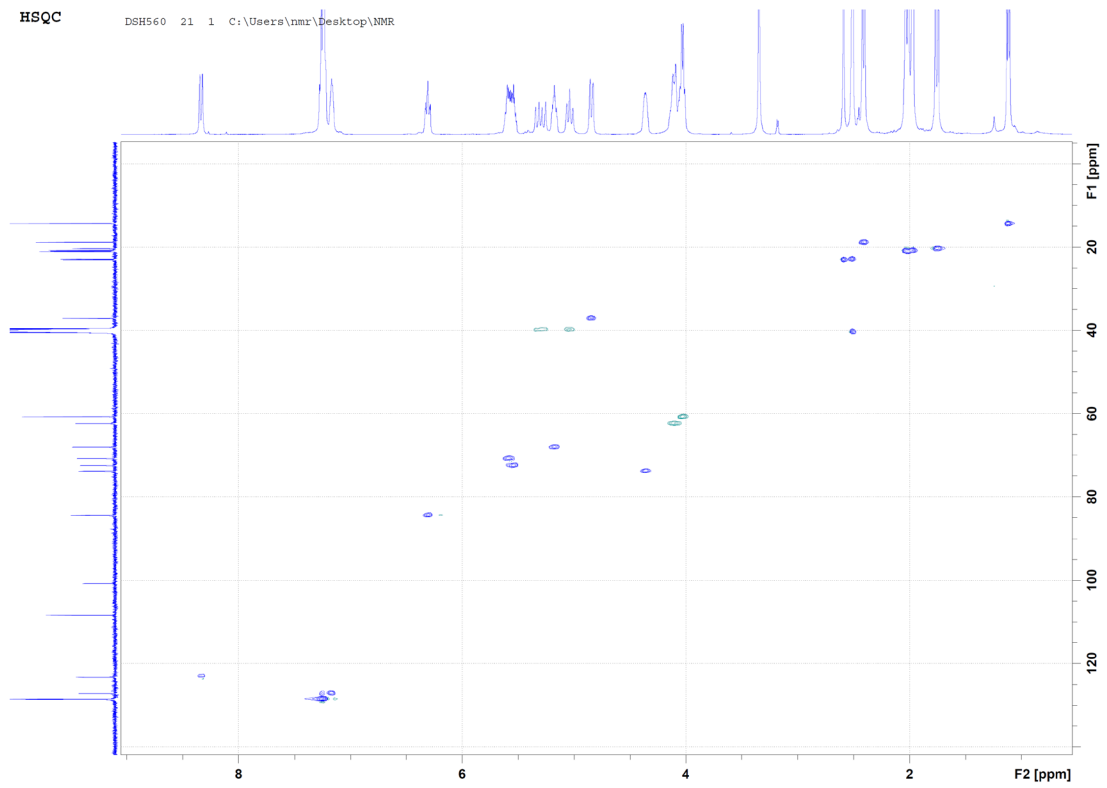

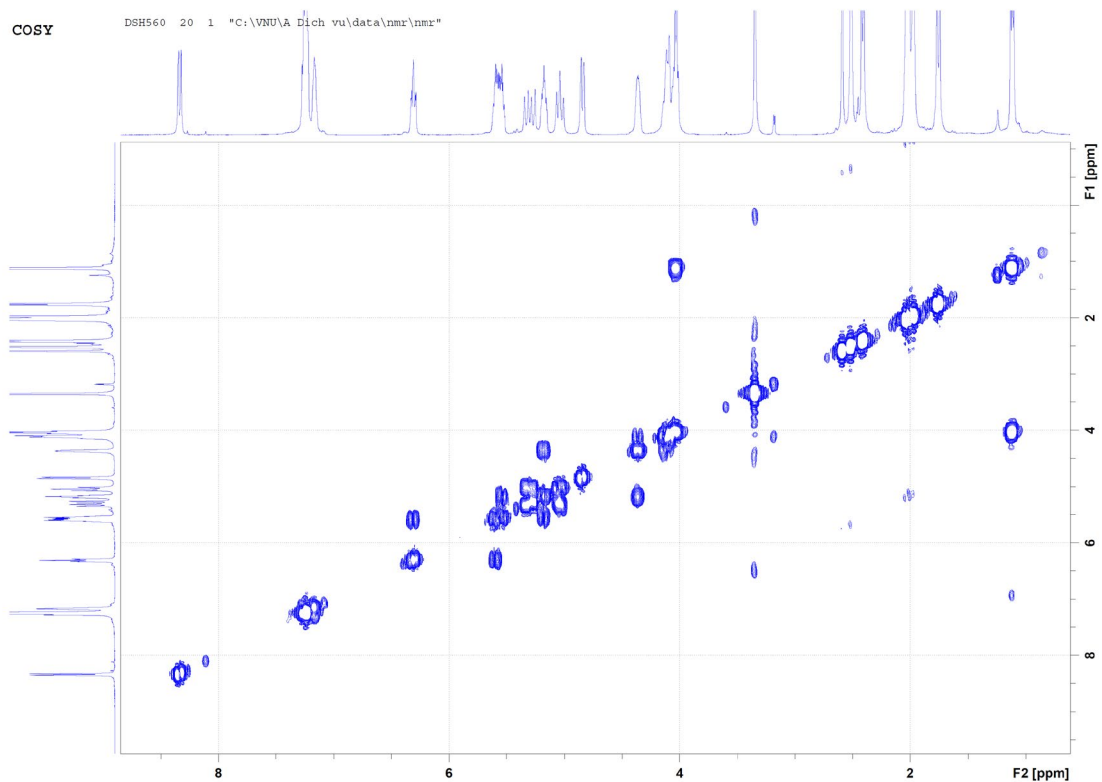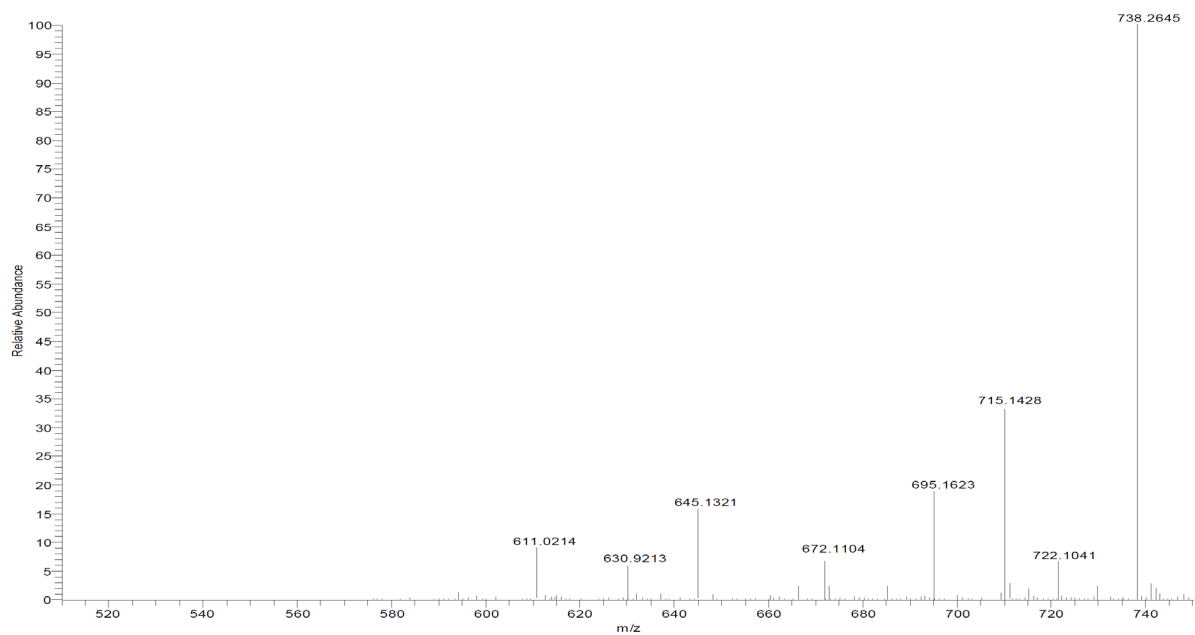

*Ethyl 3-(1-((2,3,4,6-tetra-O-acetyl- $\beta$ -D-glucopyranosyl))-1H-1,2,3-triazol-4-yl)methyl-2,7-dimethyl-5-(4-nitrophenyl)-4-oxo-3,5-dihydro-4H-pyrano[2,3-d]pyrimidin-6-carboxylate (8b)*

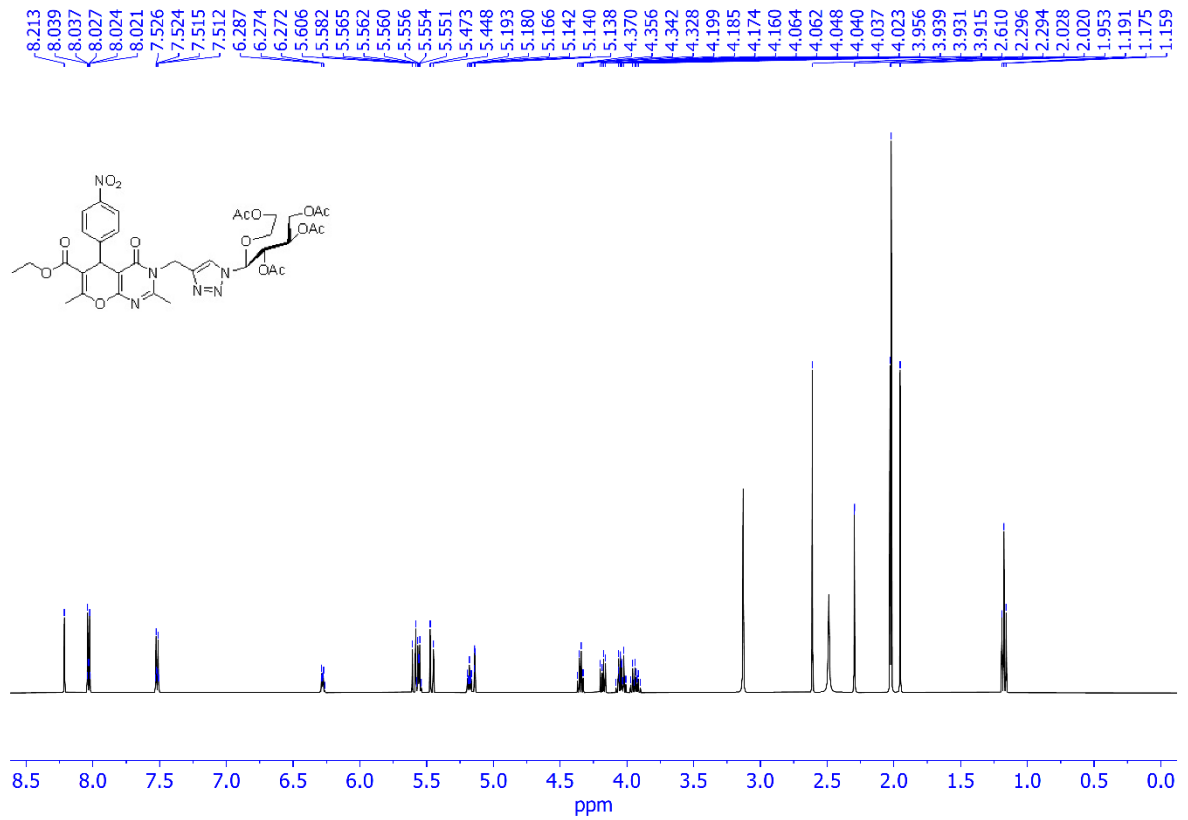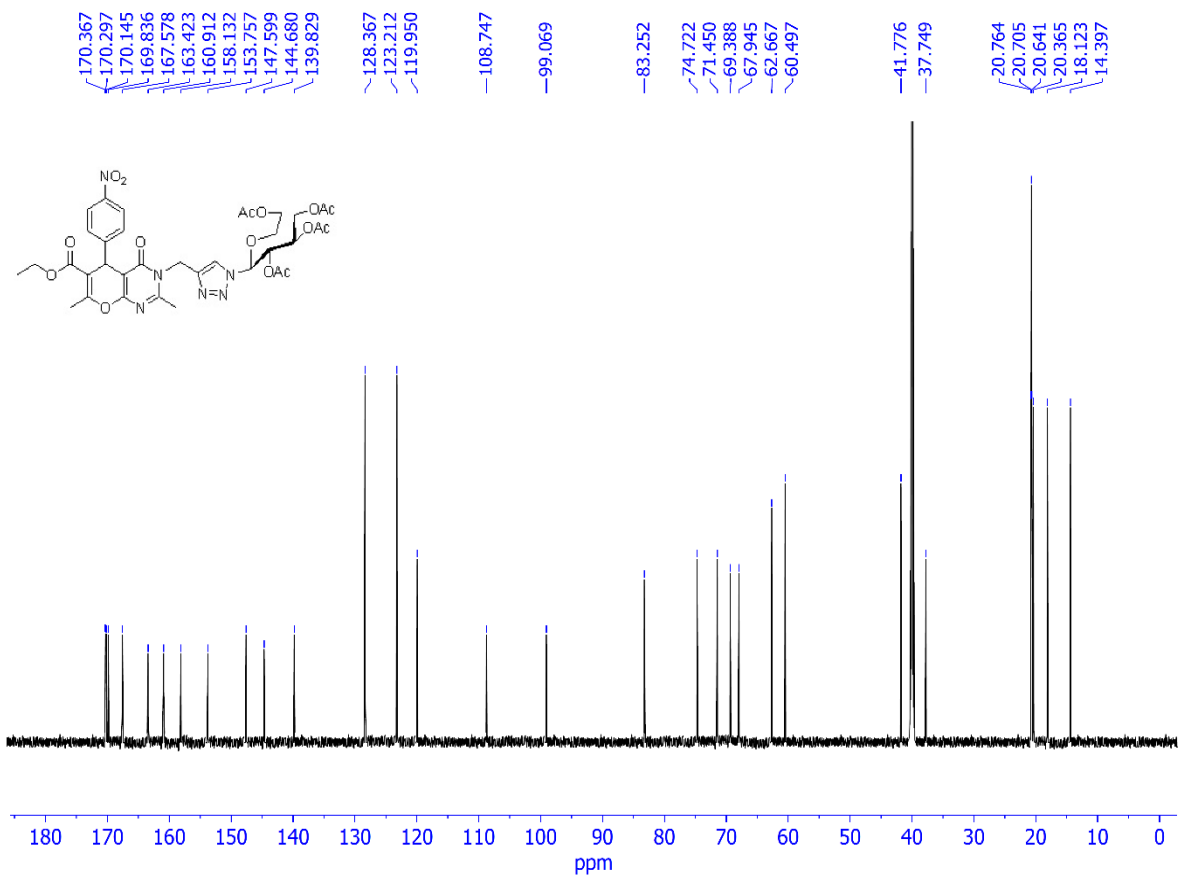

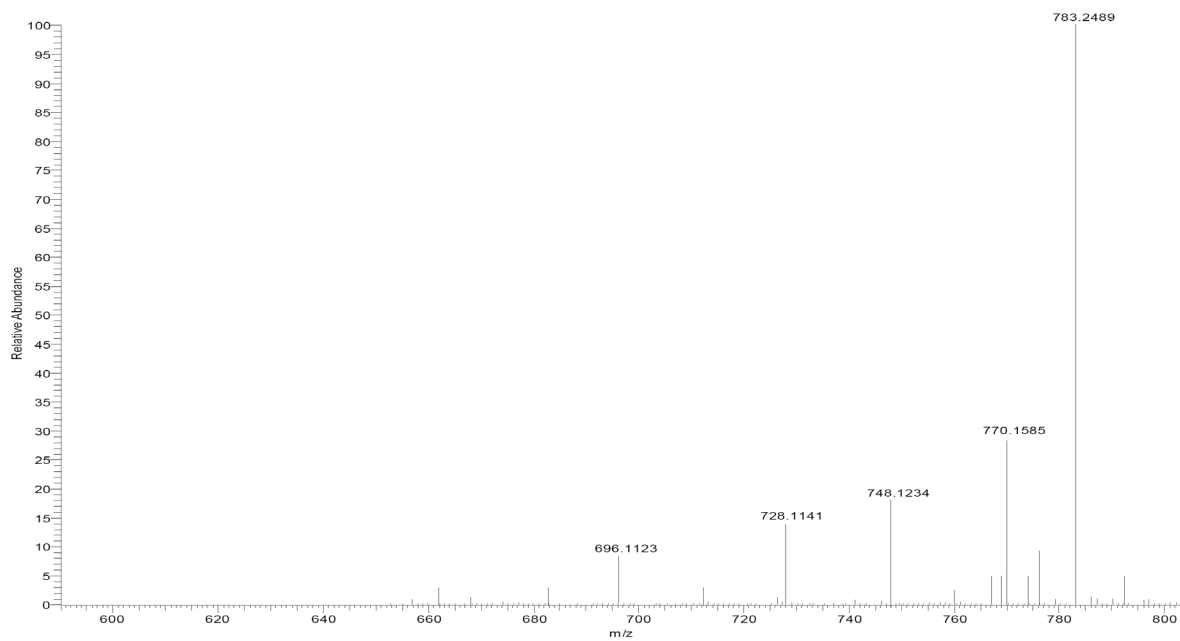

*Ethyl 3-(1-((2,3,4,6-tetra-O-acetyl- $\beta$ -D-glucopyranosyl))-1H-1,2,3-triazol-4-yl)methyl-2,7-dimethyl-5-(4-chlorophenyl)-4-oxo-3,5-dihydro-4H-pyrano[2,3-d]pyrimidin-6-carboxylate (8c)*

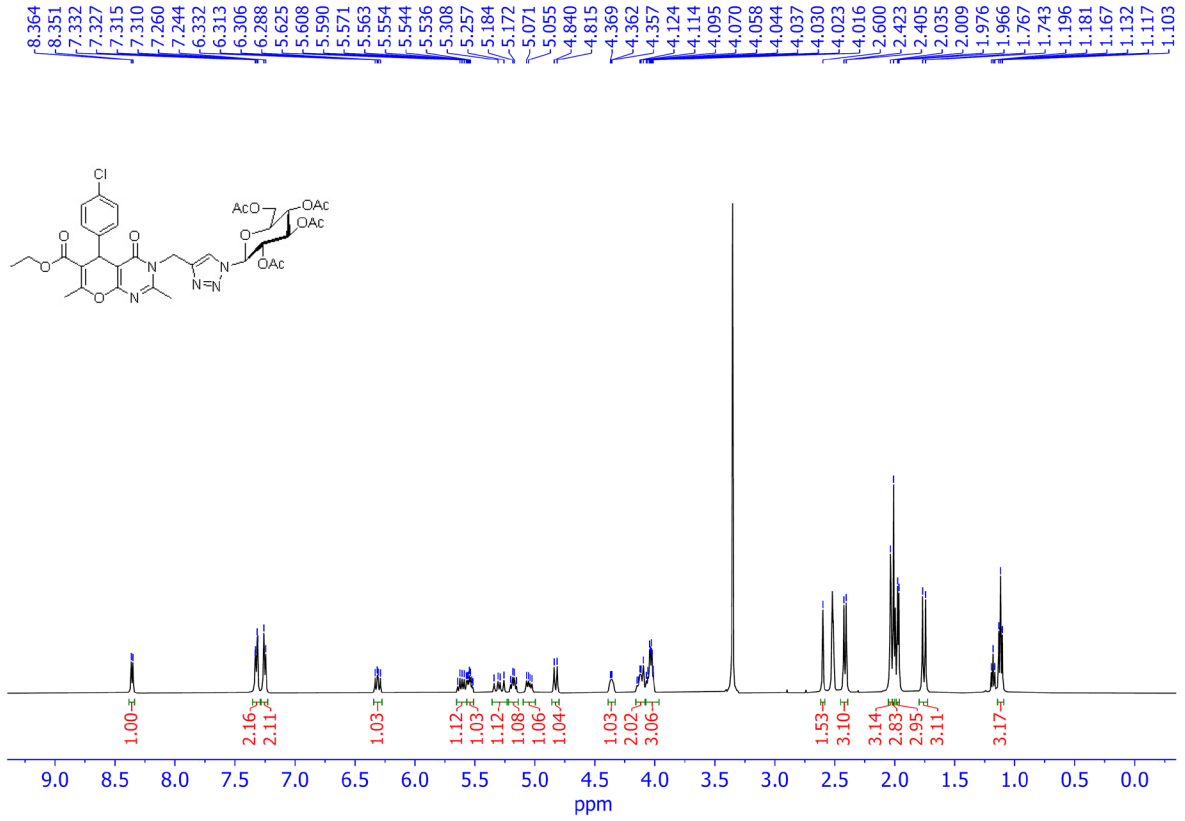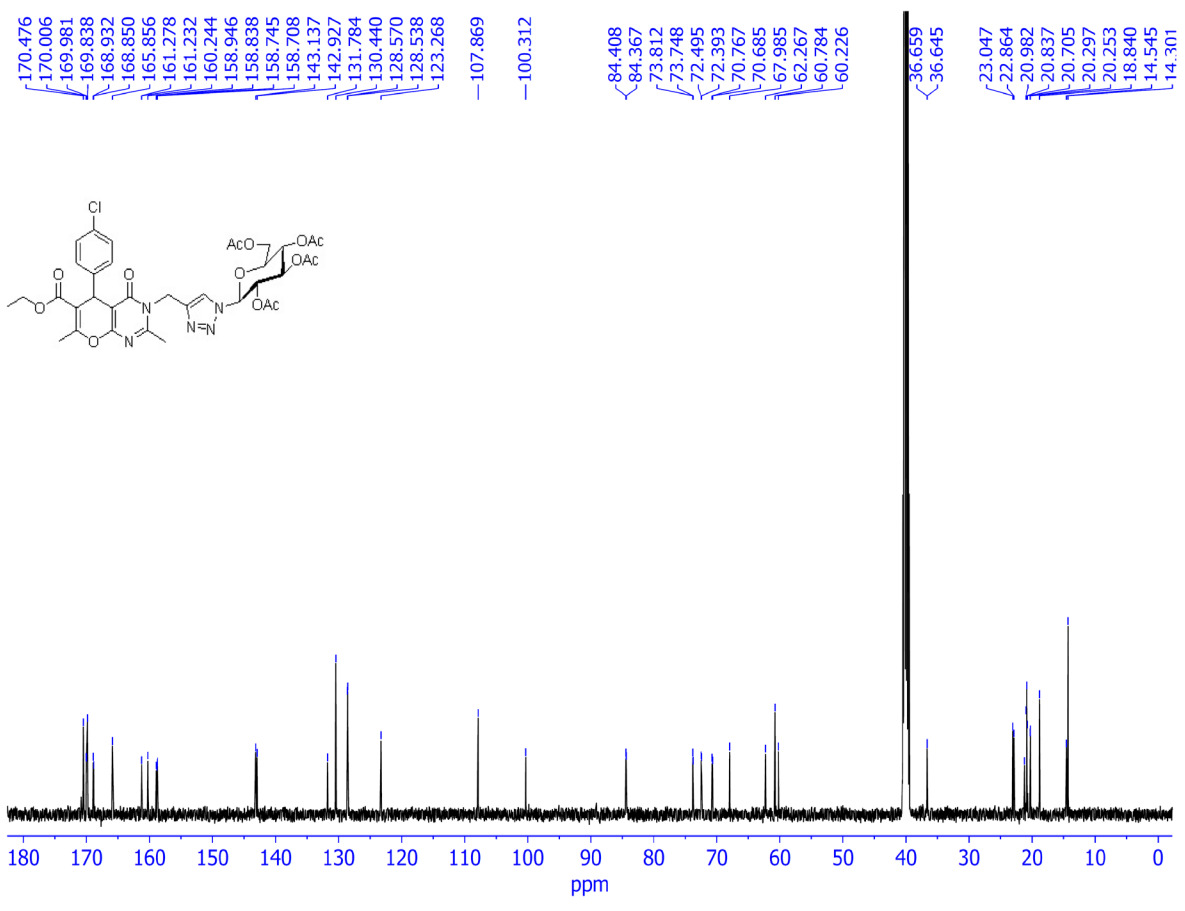

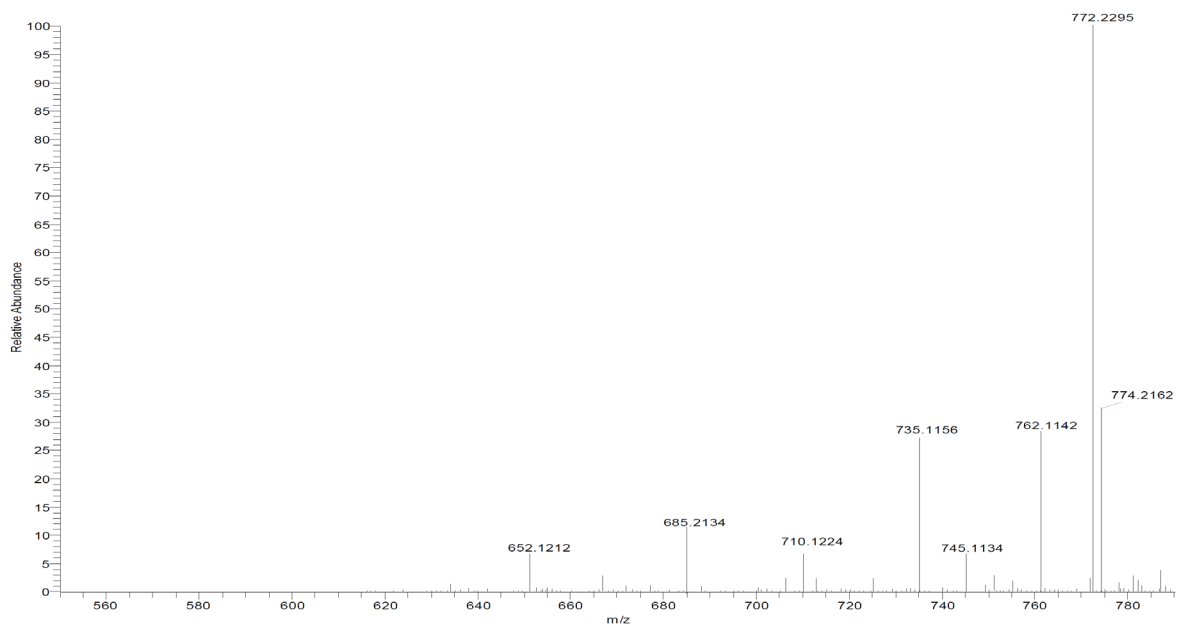

*Ethyl 3-(1-((2,3,4,6-tetra-O-acetyl- $\beta$ -D-glucopyranosyl))-1H-1,2,3-triazol-4-yl)methyl-2,7-dimethyl-5-(4-chloro-3-nitrophenyl)-4-oxo-3,5-dihydro-4H-pyrano[2,3-d]pyrimidin-6-carboxylate (8d)*

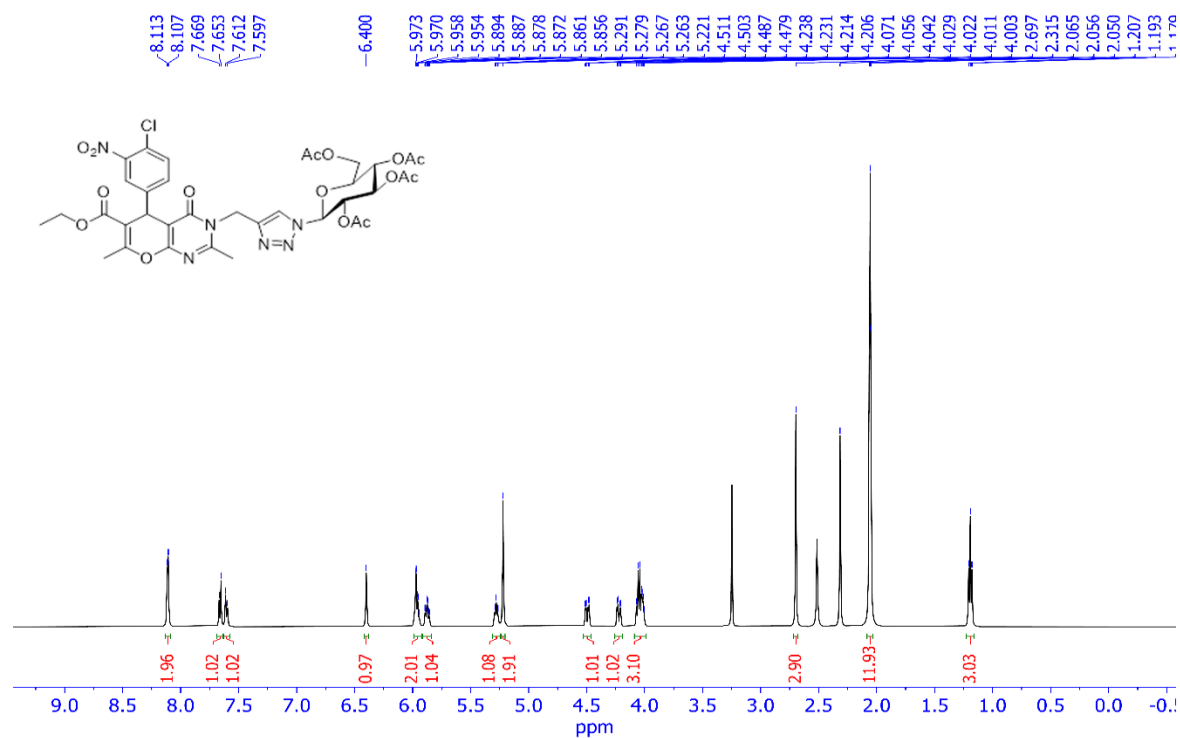

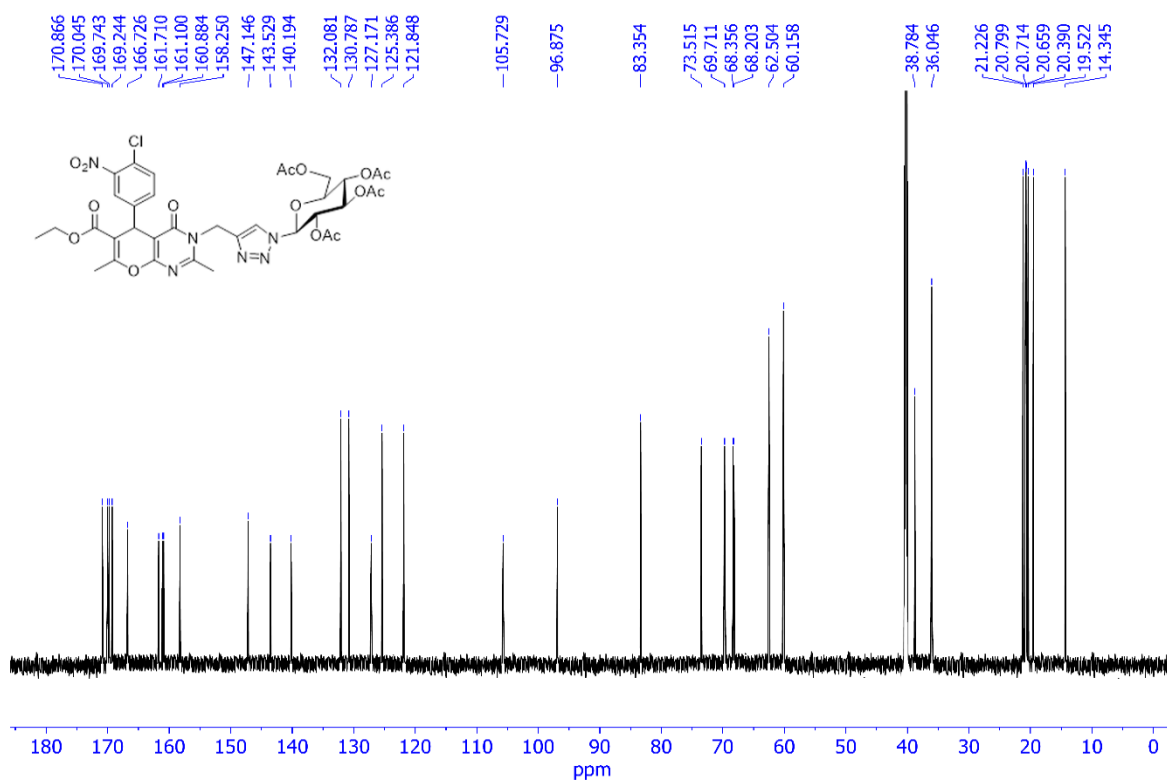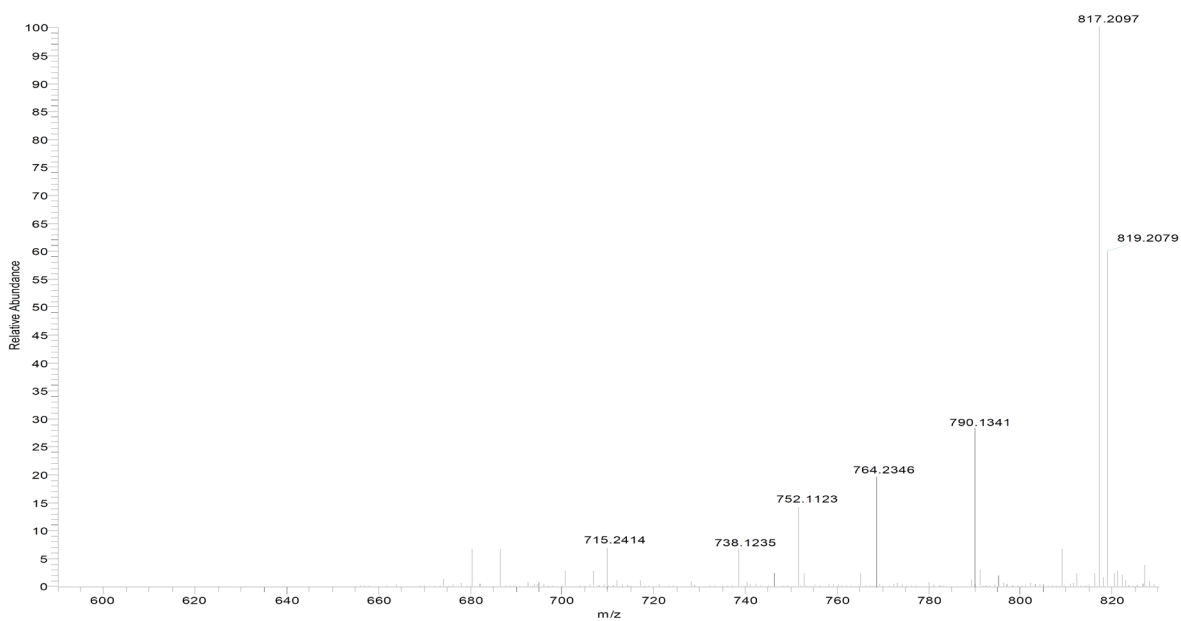

*Ethyl 3-(1-((2,3,4,6-tetra-O-acetyl-β-D-glucopyranosyl))-1H-1,2,3-triazol-4-yl)methyl-2,7-dimethyl-5-(2-chloro-4-methylphenyl)-4-oxo-3,5-dihydro-4H-pyrano[2,3-d]pyrimidin-6-carboxylate (**8e**)*



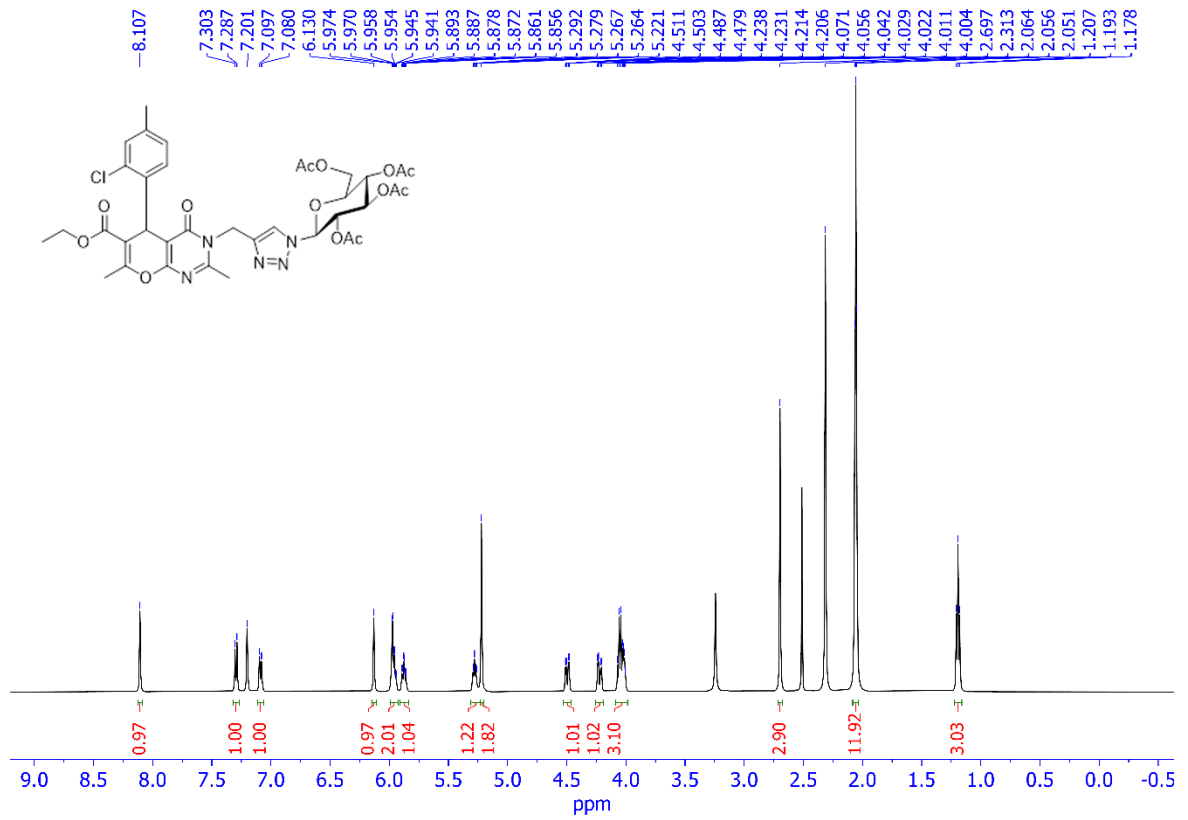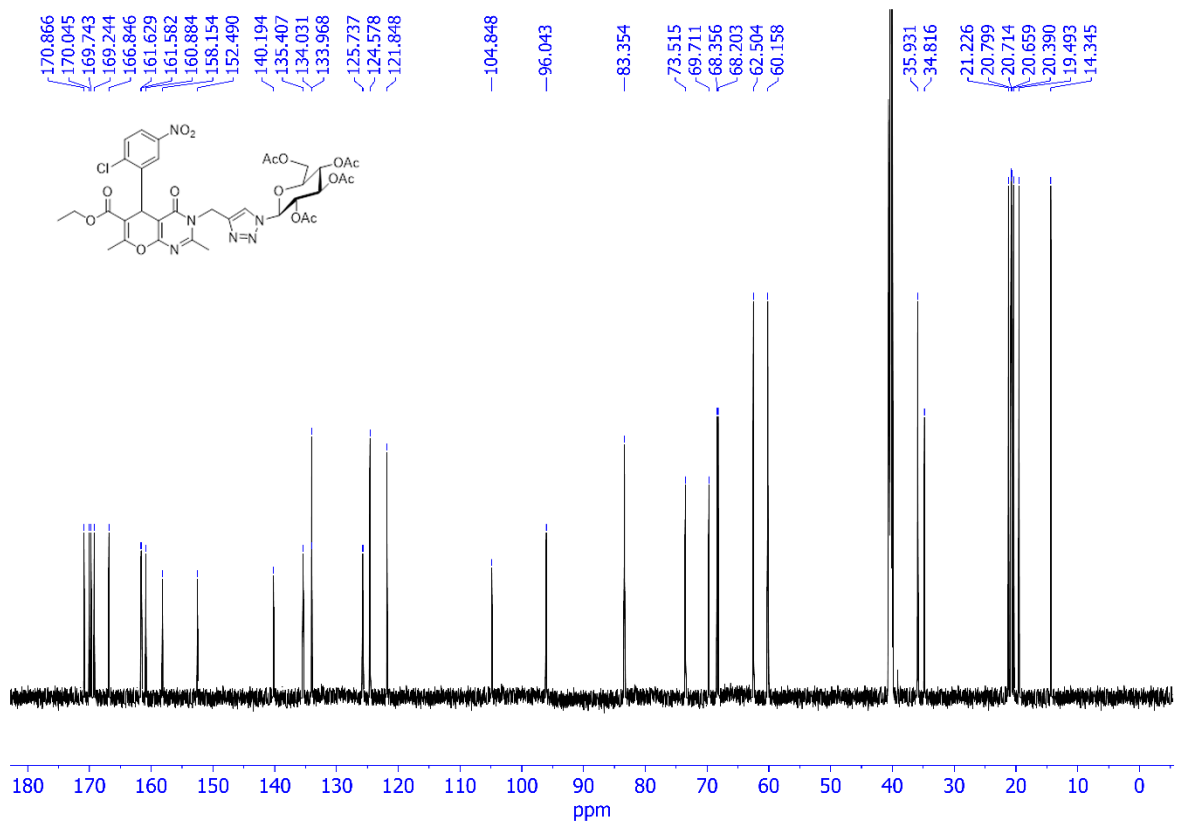

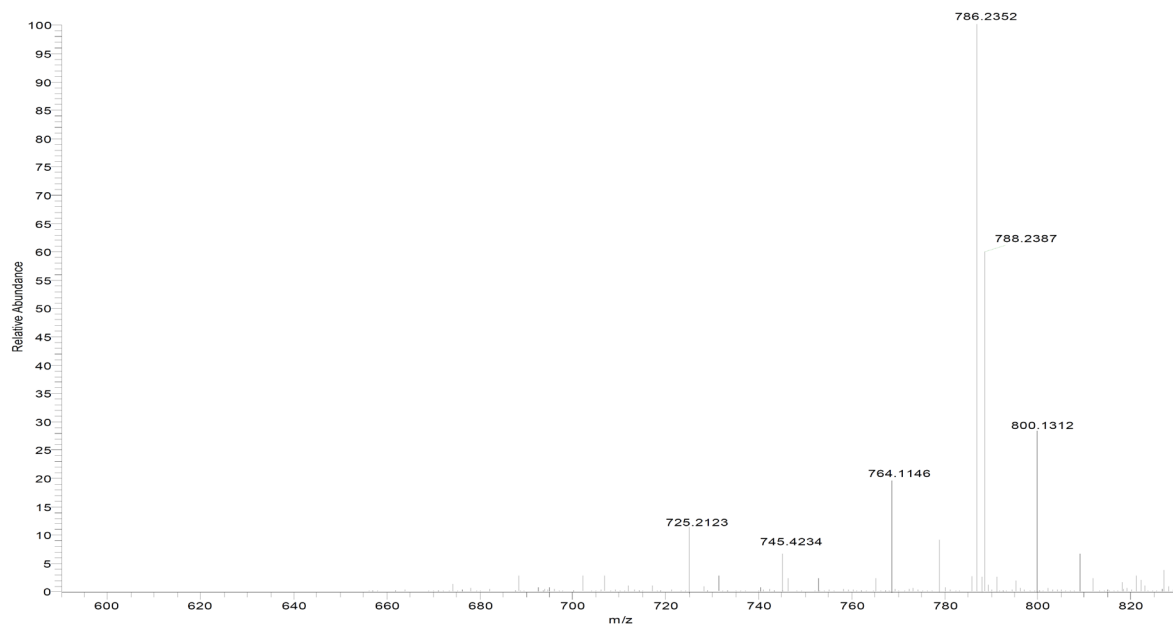

*Ethyl 3-(1-((2,3,4,6-tetra-O-acetyl- $\beta$ -D-glucopyranosyl))-1H-1,2,3-triazol-4-yl)methyl-2,7-dimethyl-5-(2-chloro-4-methoxyphenyl)-4-oxo-3,5-dihydro-4H-pyrano[2,3-d]pyrimidin-6-carboxylate (8f)*

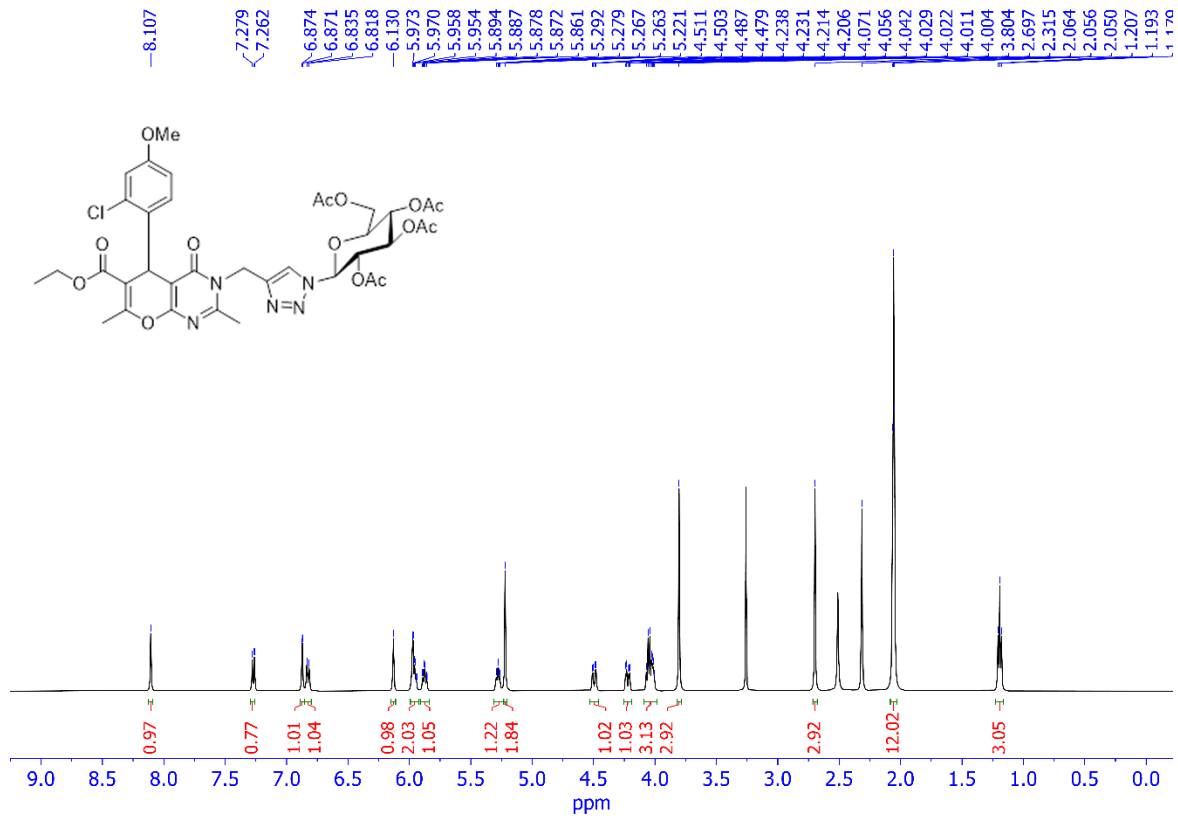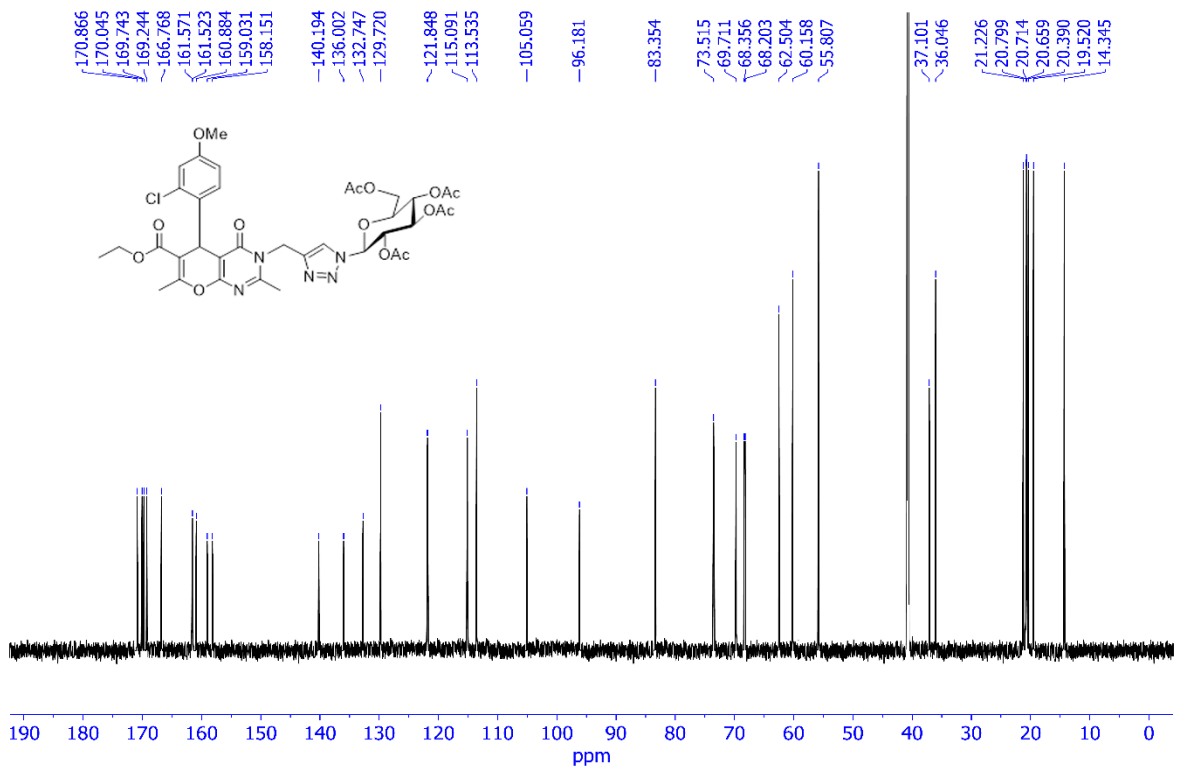

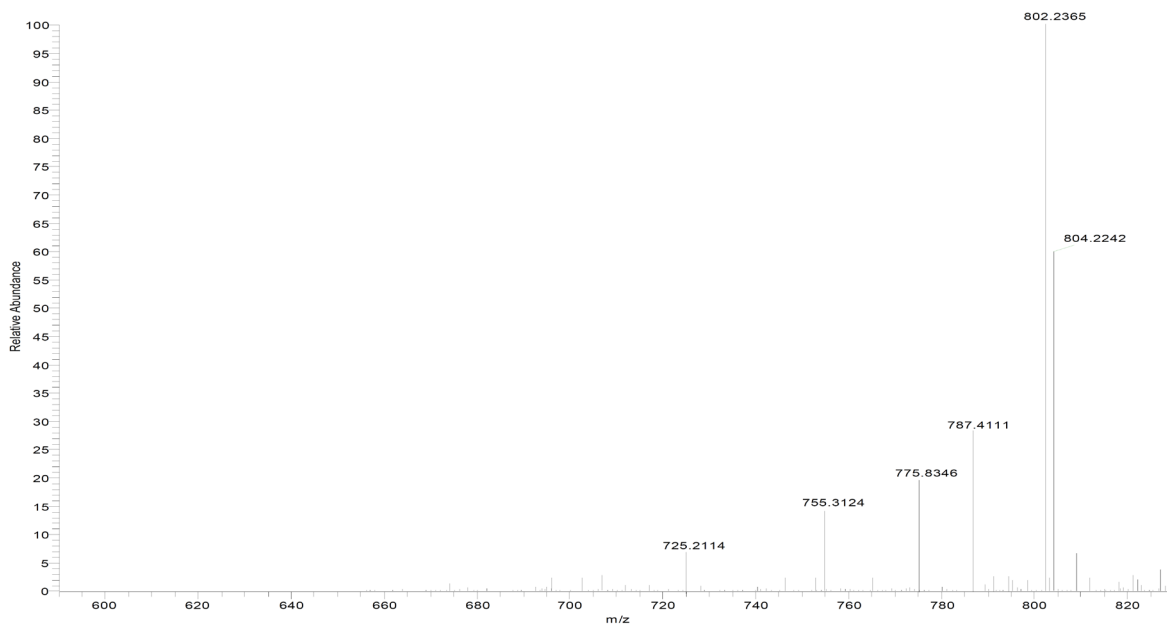

*Ethyl 3-(1-((2,3,4,6-tetra-O-acetyl- $\beta$ -D-glucopyranosyl))-1H-1,2,3-triazol-4-yl)methyl-2,7-dimethyl-5-(5-chloro-2-hydroxy-3-nitrophenyl)-4-oxo-3,5-dihydro-4H-pyran[2,3-d]pyrimidin-6-carboxylate (**8g**)*

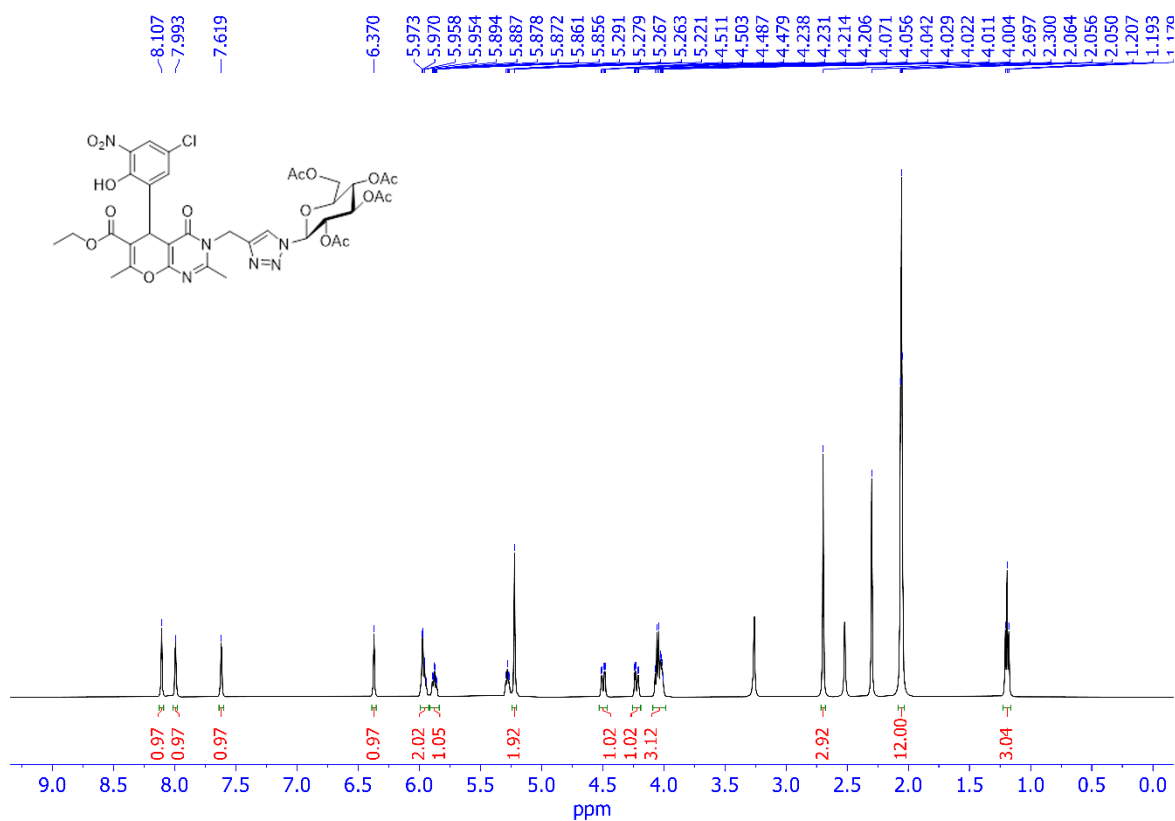

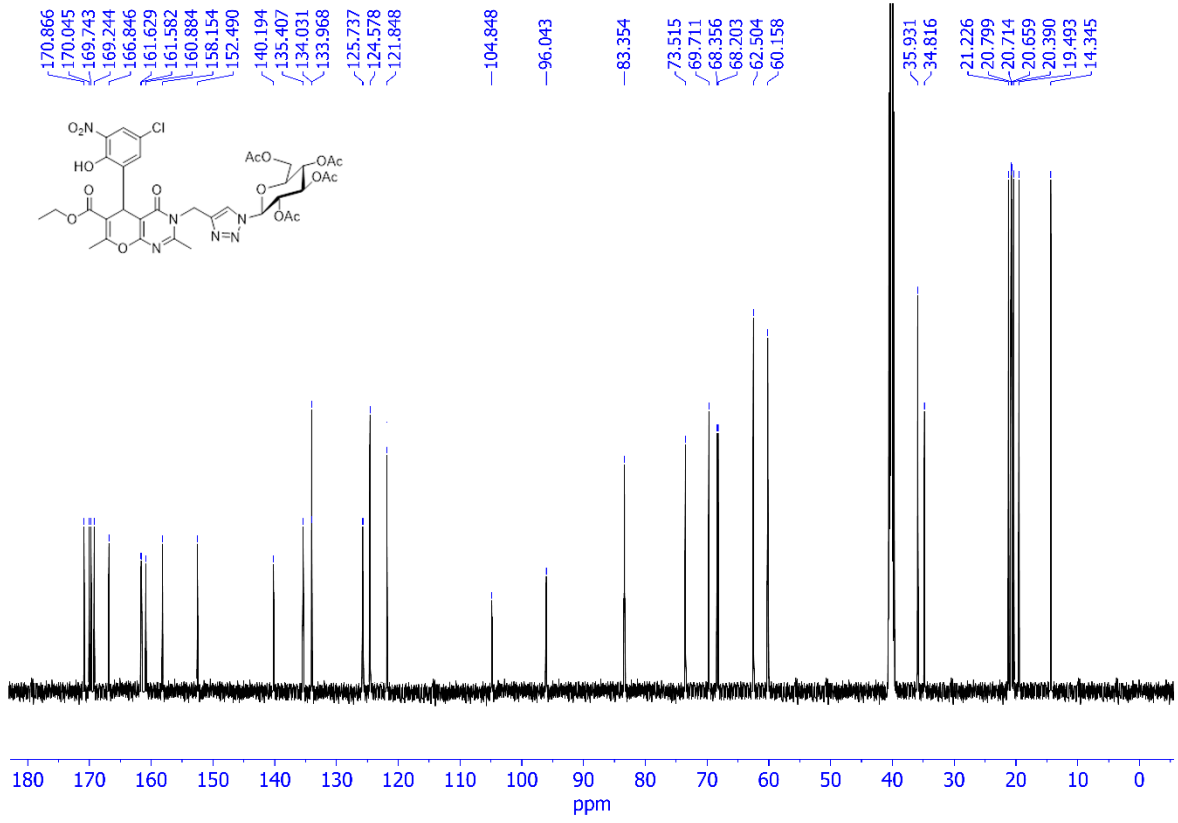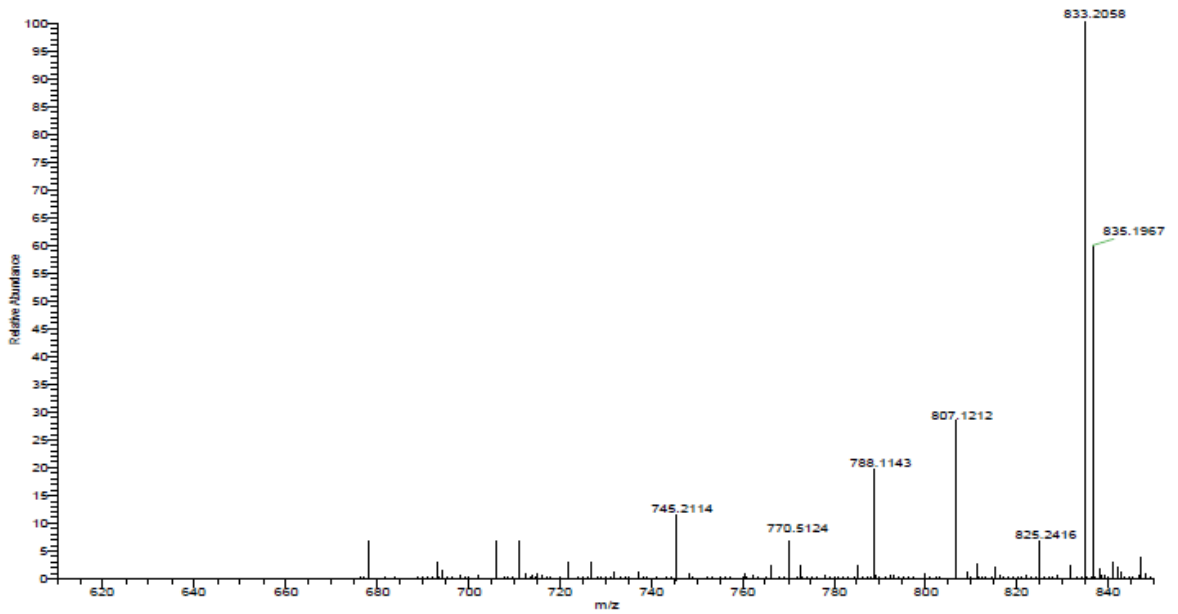

*Ethyl 3-(1-((2,3,4,6-tetra-O-acetyl- $\beta$ -D-glucopyranosyl))-1H-1,2,3-triazol-4-yl)methyl-2,7-dimethyl-5-(4-bromophenyl)-4-oxo-3,5-dihydro-4H-pyrano[2,3-d]pyrimidin-6-carboxylate (8h)*

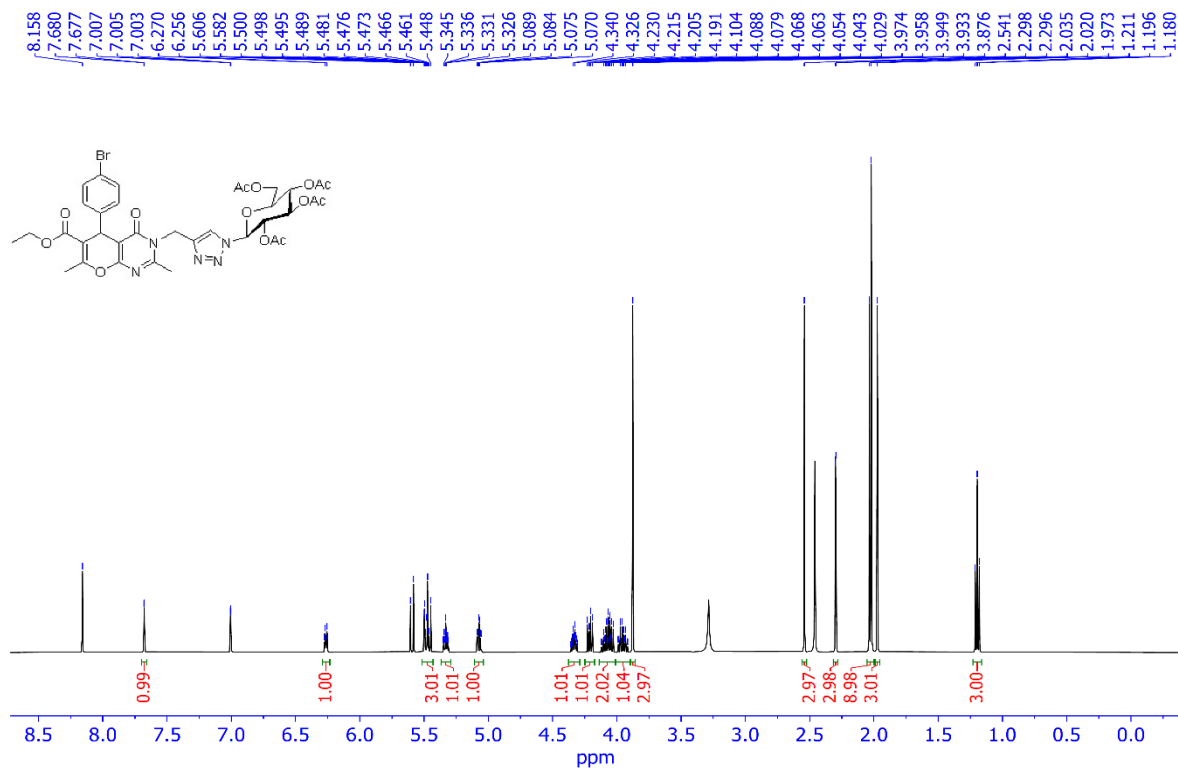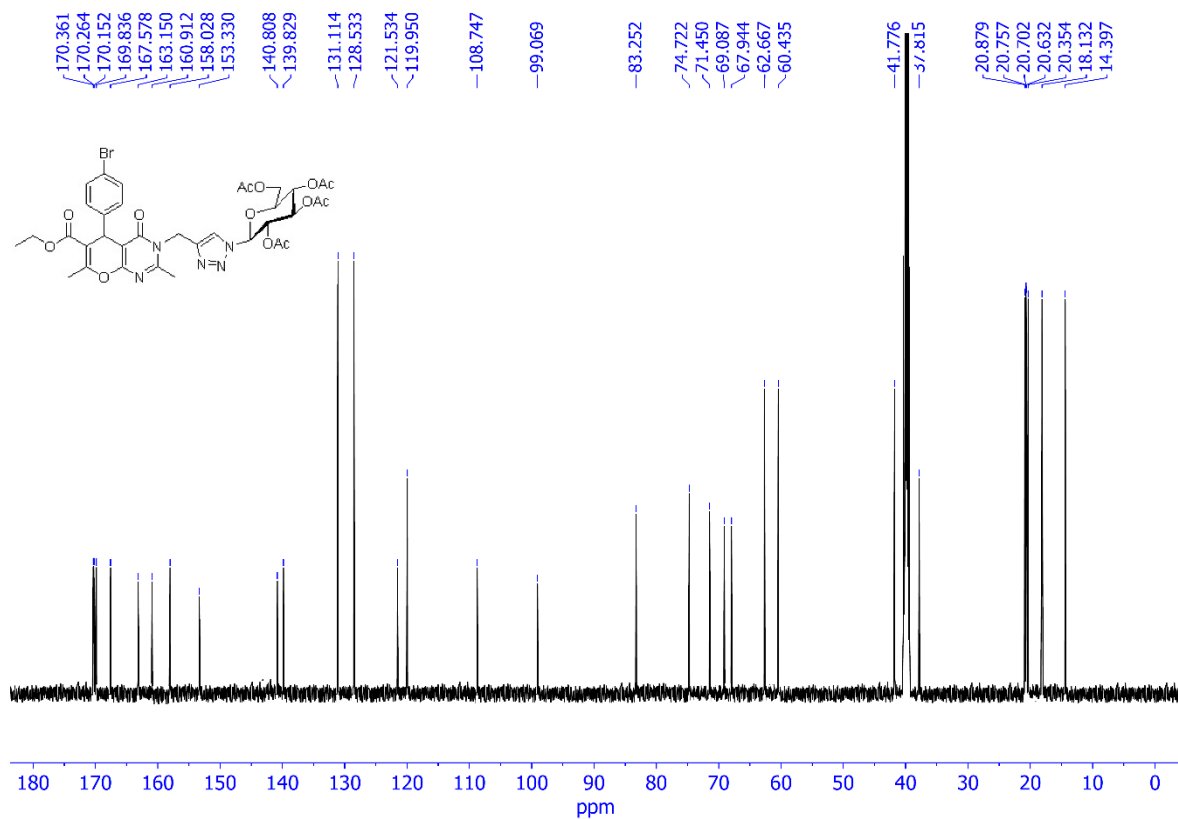

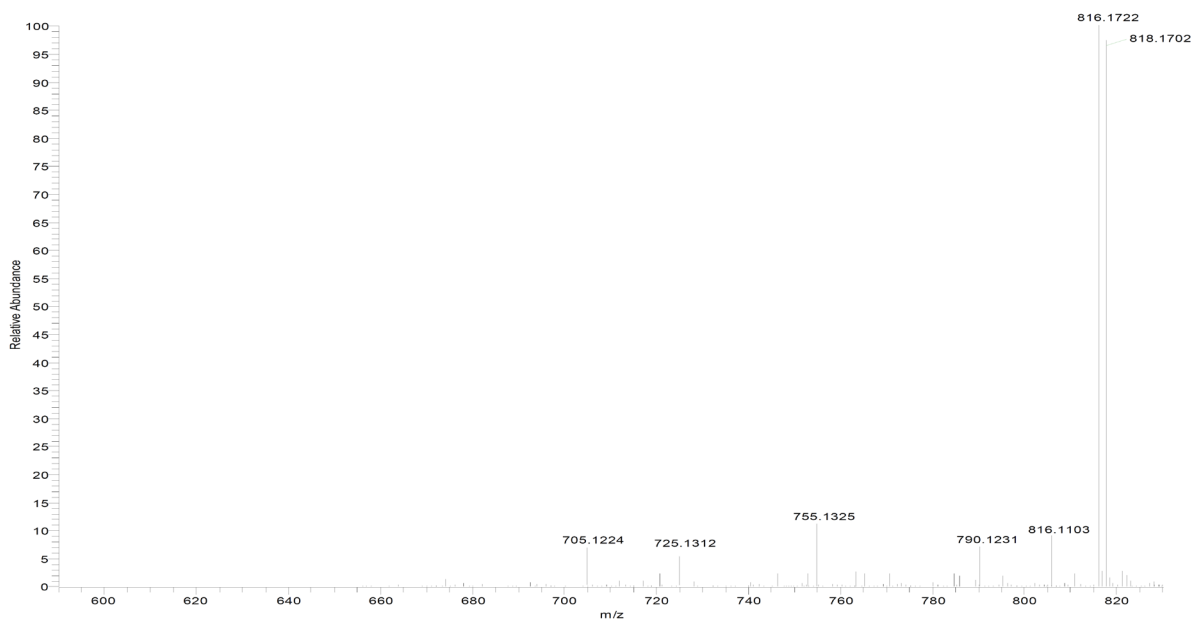

*thyl 3-(1-((2,3,4,6-tetra-O-acetyl-β-D-glucopyranosyl))-1H-1,2,3-triazol-4-yl)methyl-2,7-dimethyl-5-(4-hydroxyphenyl)-4-oxo-3,5-dihydro-4H-pyrano[2,3-d]pyrimidin-6-carboxylate (8i)*

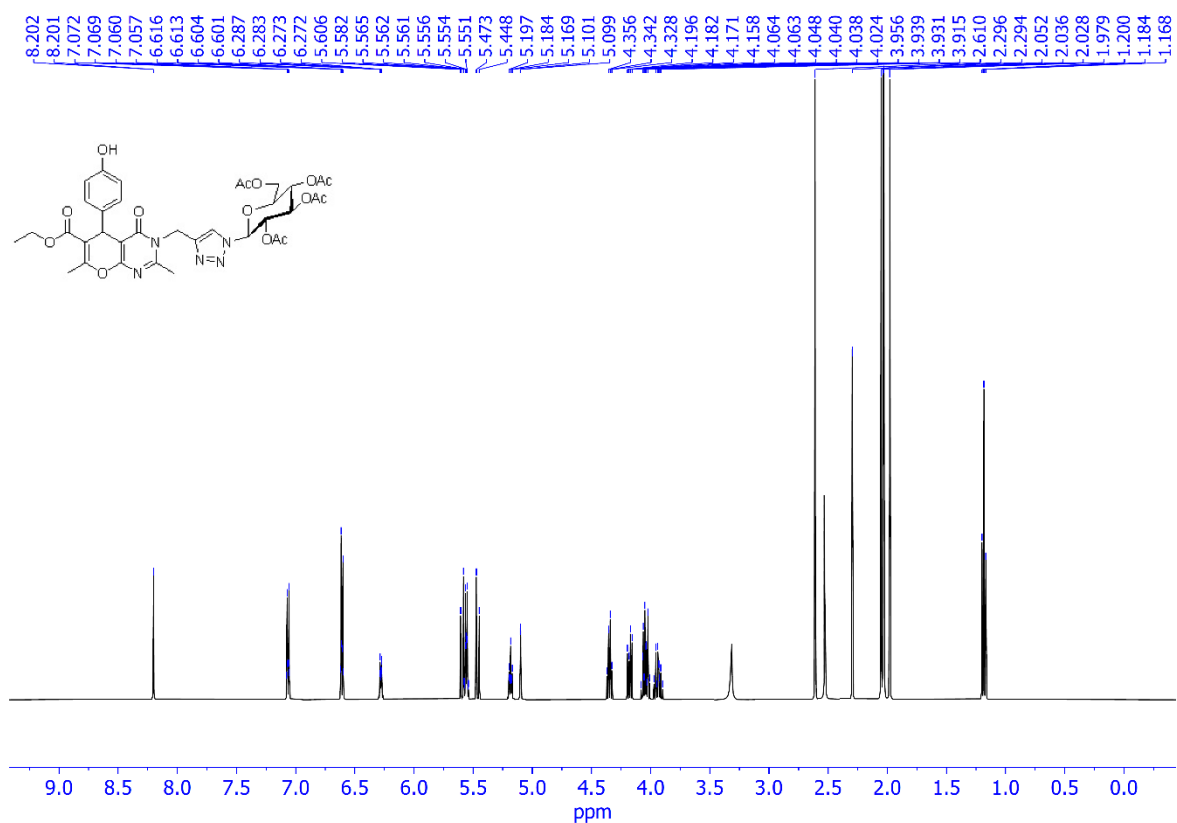

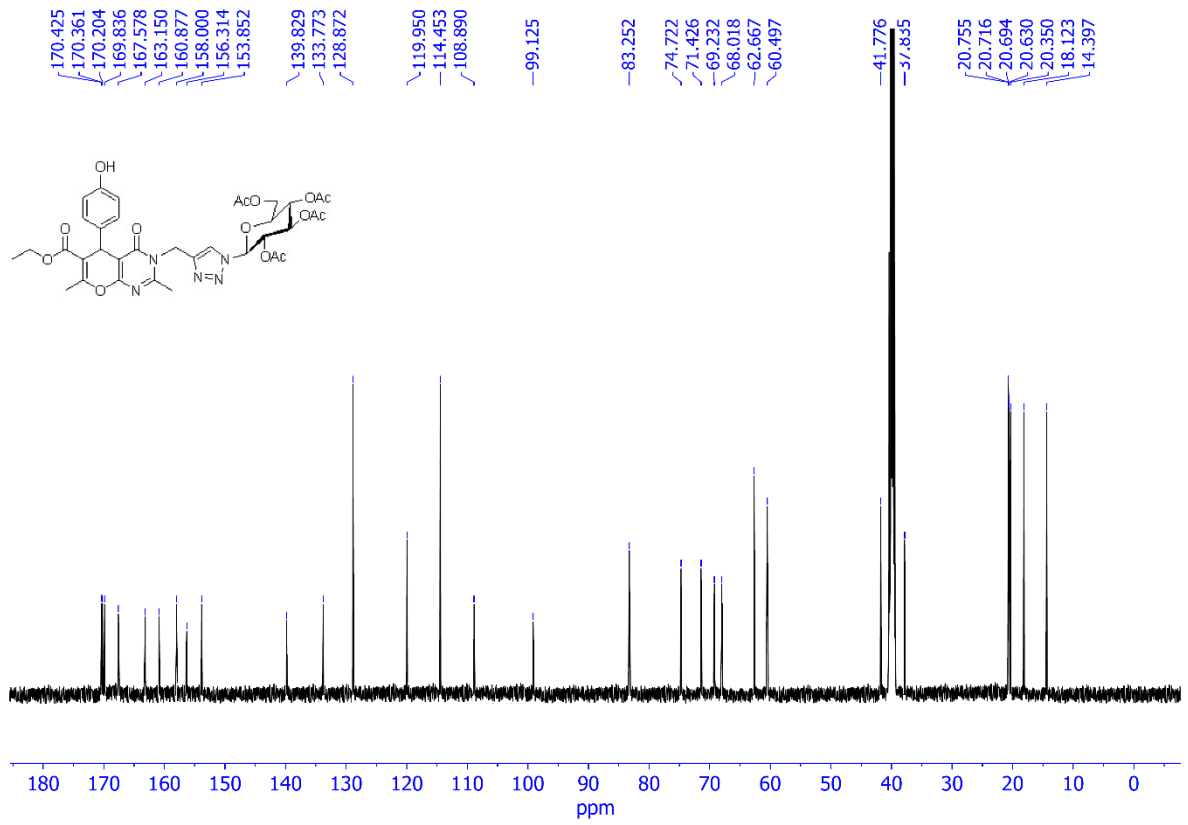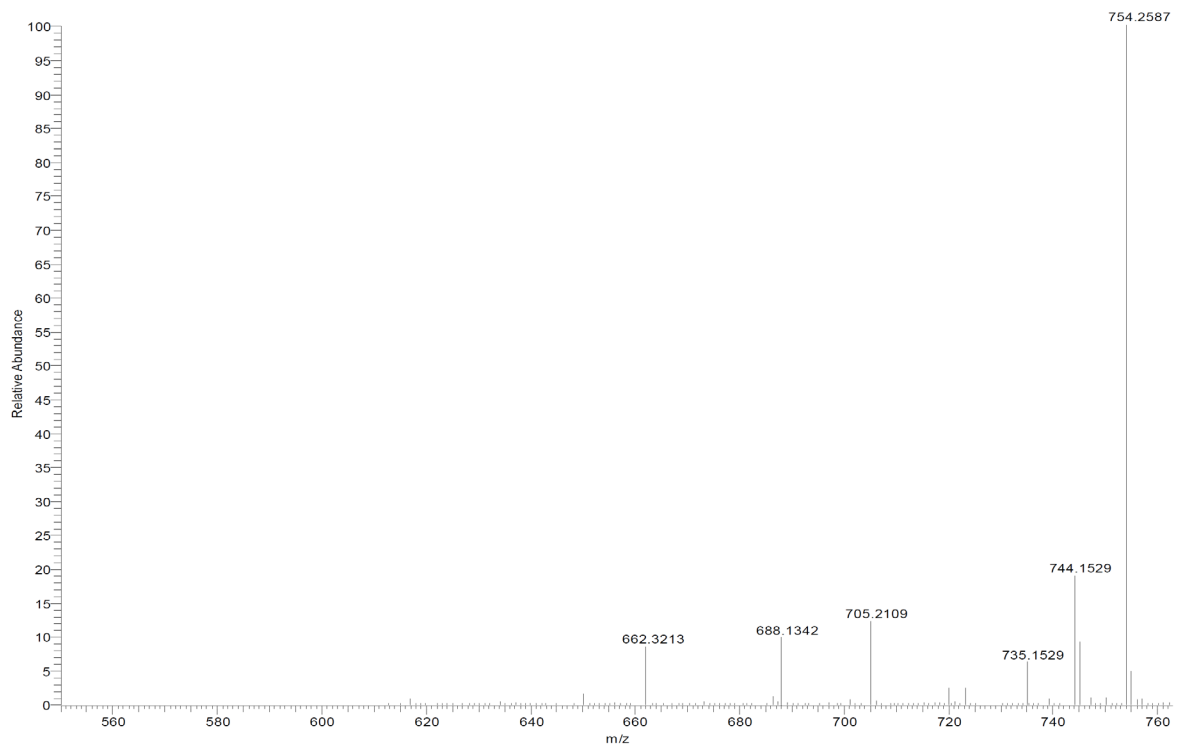



*Ethyl 3-(1-((2,3,4,6-tetra-O-acetyl- $\beta$ -D-glucopyranosyl))-1H-1,2,3-triazol-4-yl)methyl-2,7-dimethyl-5-(4-methoxyphenyl)-4-oxo-3,5-dihydro-4H-pyrano[2,3-d]pyrimidin-6-carboxylate*  
**(8j)**

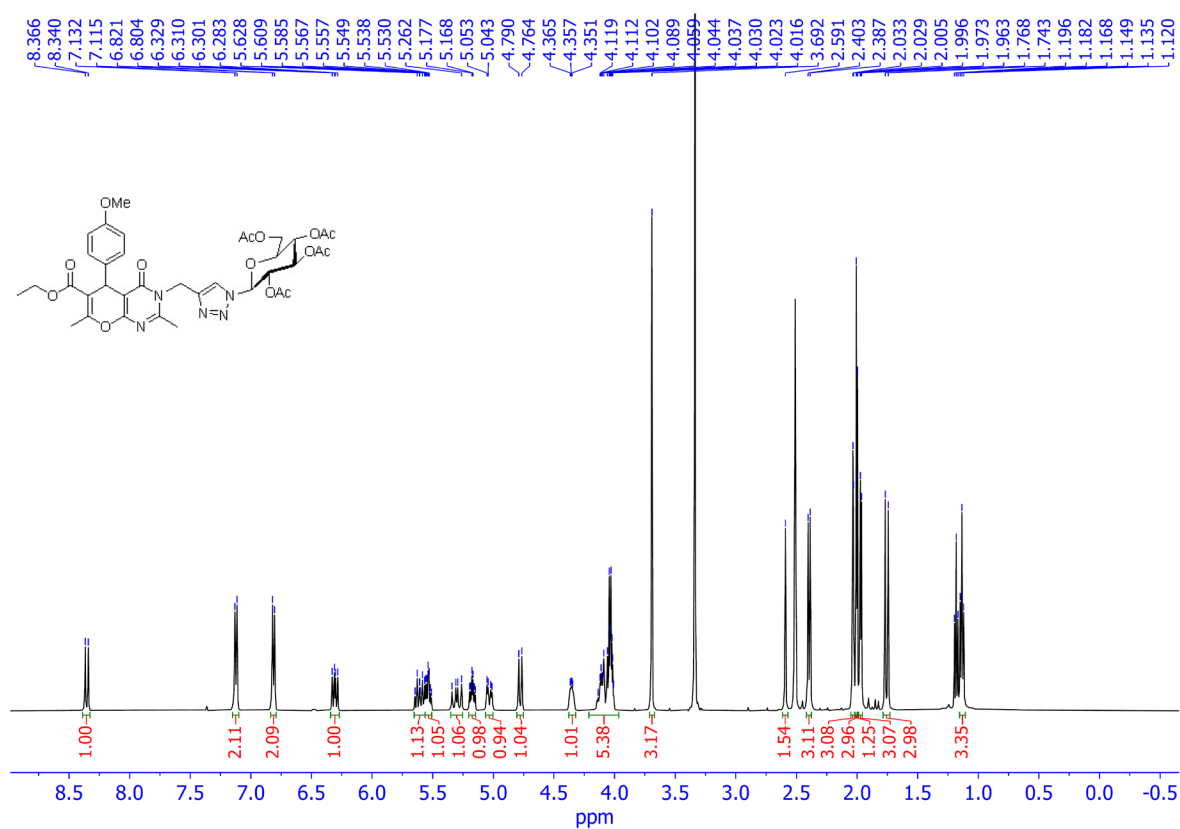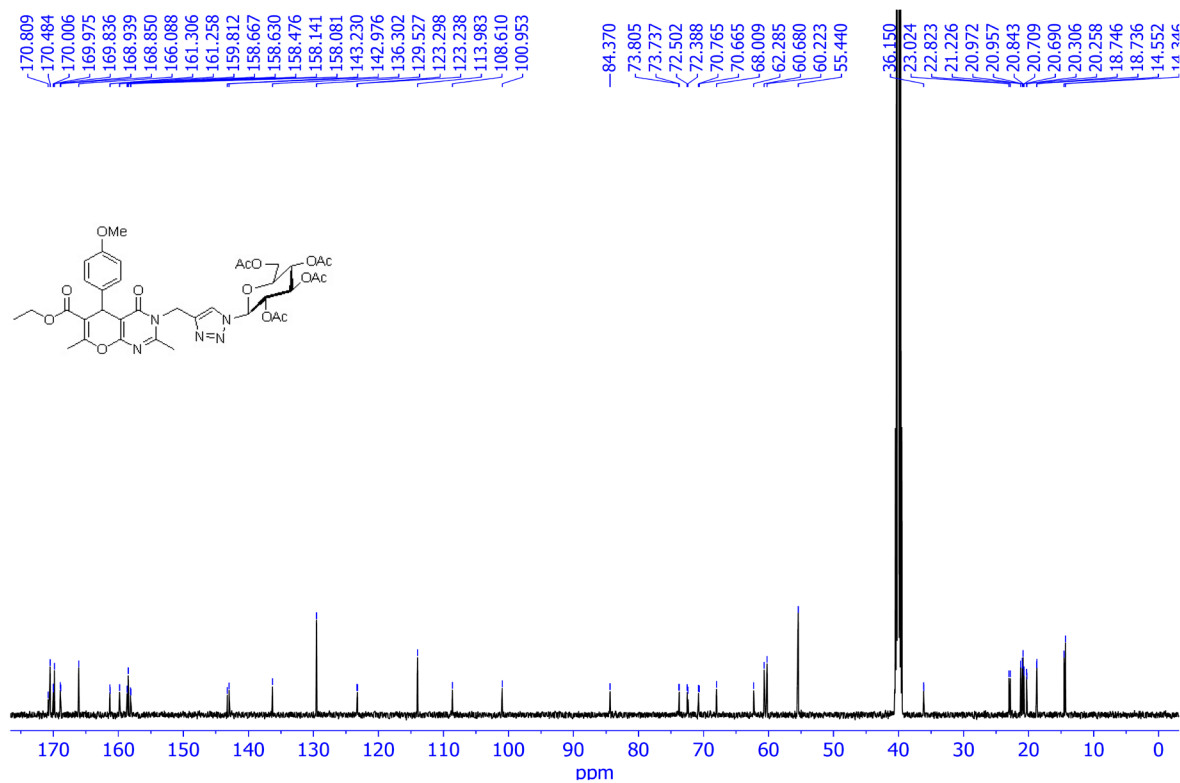

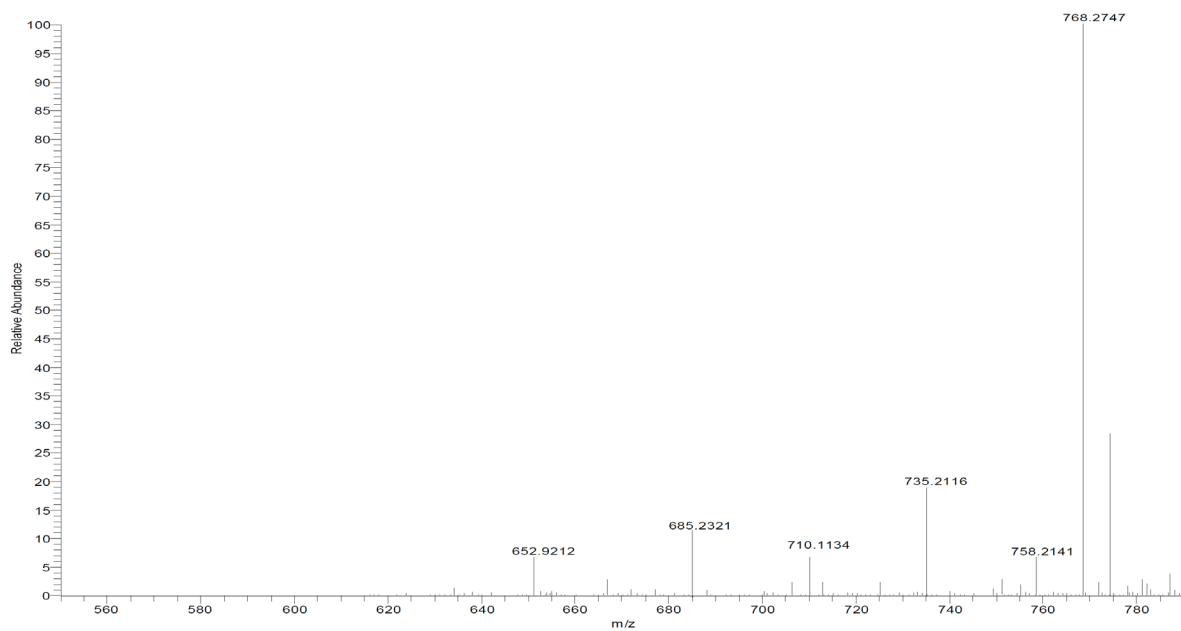

*Ethyl 3-(1-((2,3,4,6-tetra-O-acetyl- $\beta$ -D-glucopyranosyl))-1H-1,2,3-triazol-4-yl)methyl-2,7-dimethyl-5-(4-hydroxy-3-methoxyphenyl)-4-oxo-3,5-dihydro-4H-pyrano[2,3-d]pyrimidin-6-carboxylate (8k)*

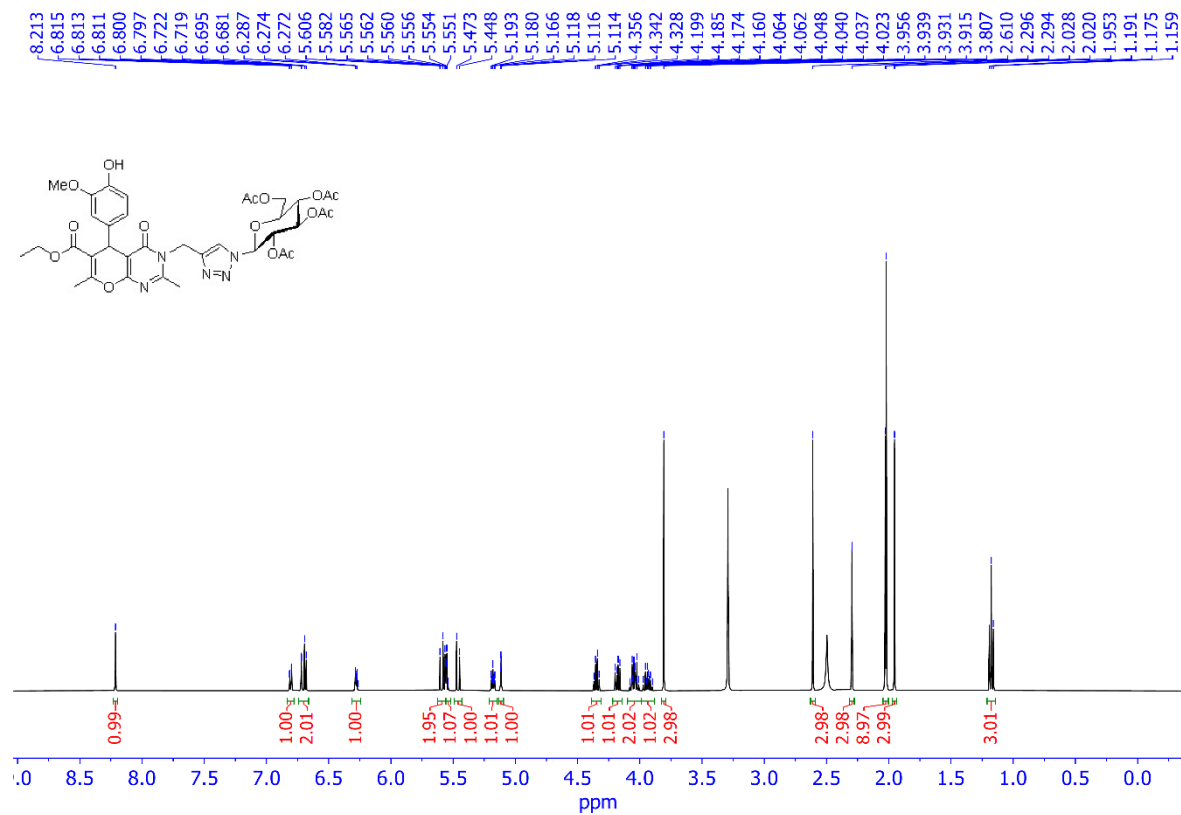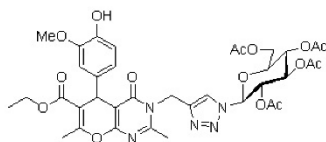

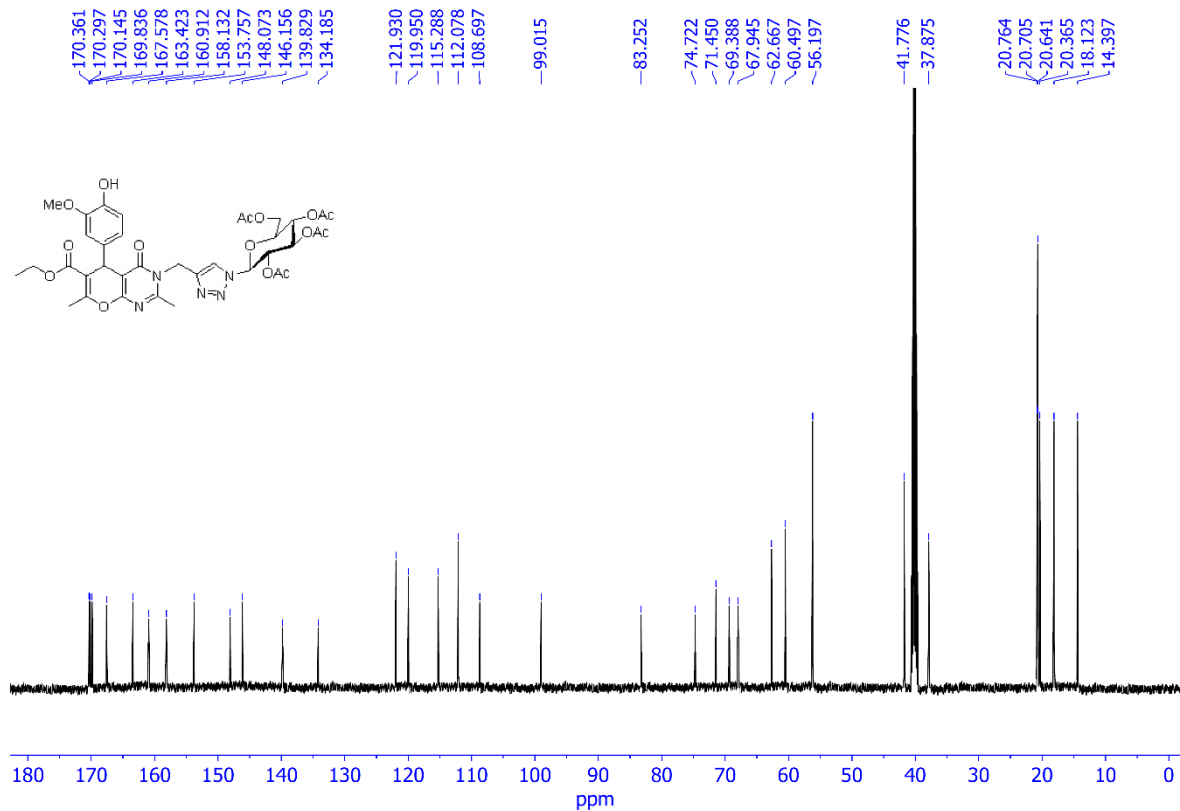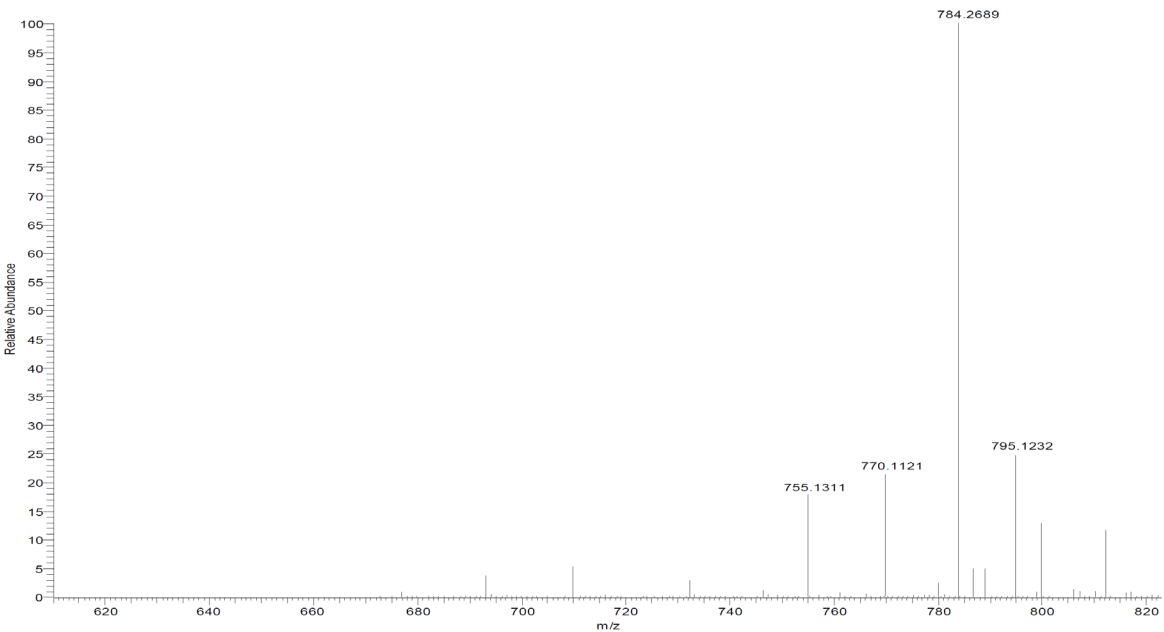

*Ethyl 3-(1-((2,3,4,6-tetra-O-acetyl- $\beta$ -D-glucopyranosyl))-1H-1,2,3-triazol-4-yl)methyl-2,7-dimethyl-5-(3-hydroxy-4-methoxyphenyl)-4-oxo-3,5-dihydro-4H-pyrano[2,3-d]pyrimidin-6-carboxylate (8l)*

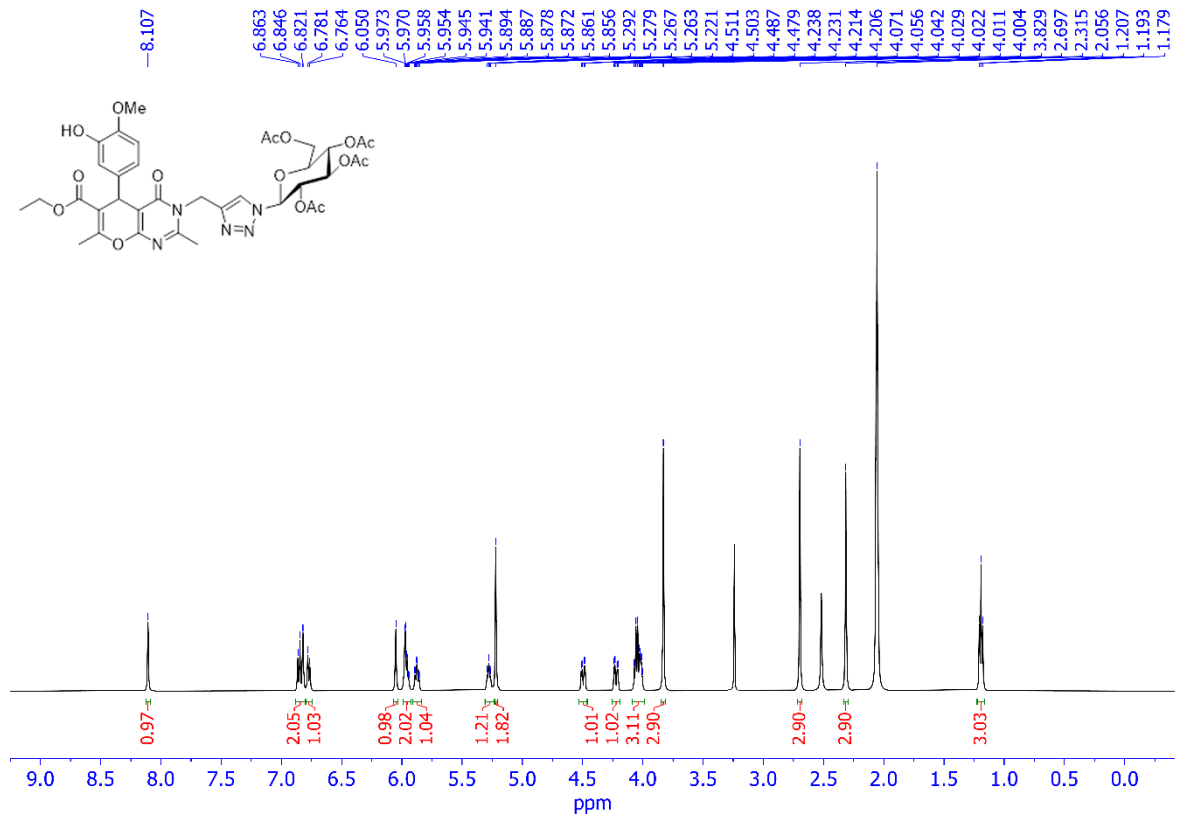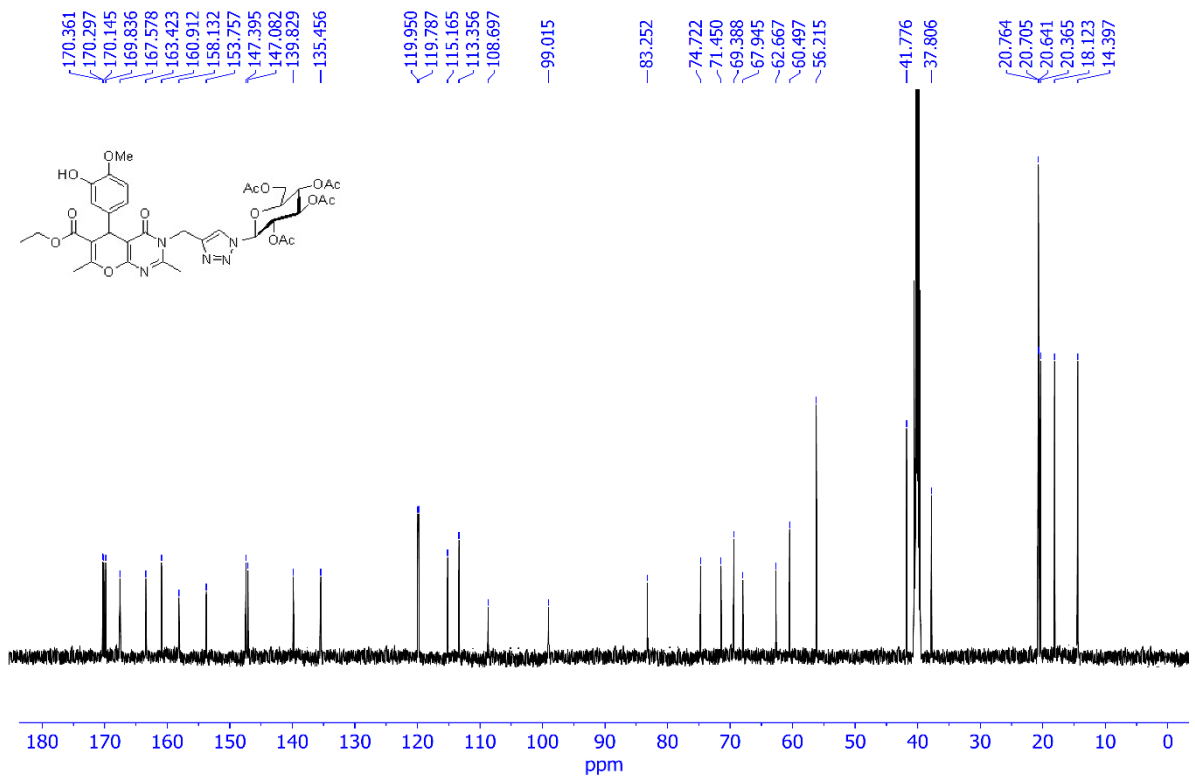

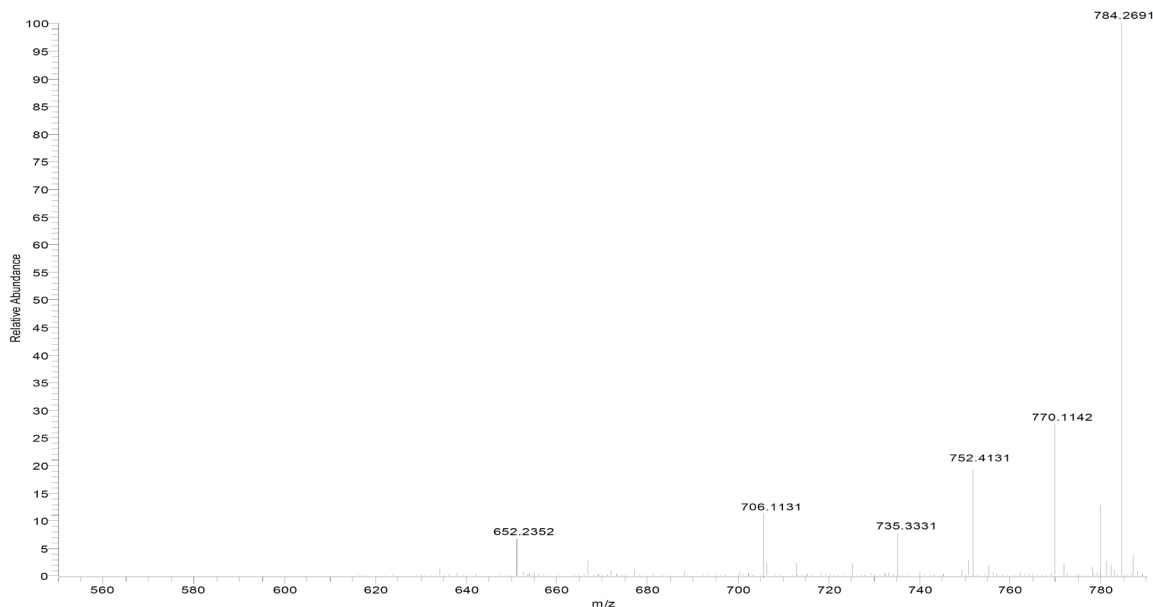

*Ethyl 3-(1-((2,3,4,6-tetra-O-acetyl- $\beta$ -D-glucopyranosyl))-1H-1,2,3-triazol-4-yl)methyl-2,7-dimethyl-5-(2,3-dihydroxyphenyl)-4-oxo-3,5-dihydro-4H-pyrano[2,3-d]pyrimidin-6-carboxylate (**8m**)*

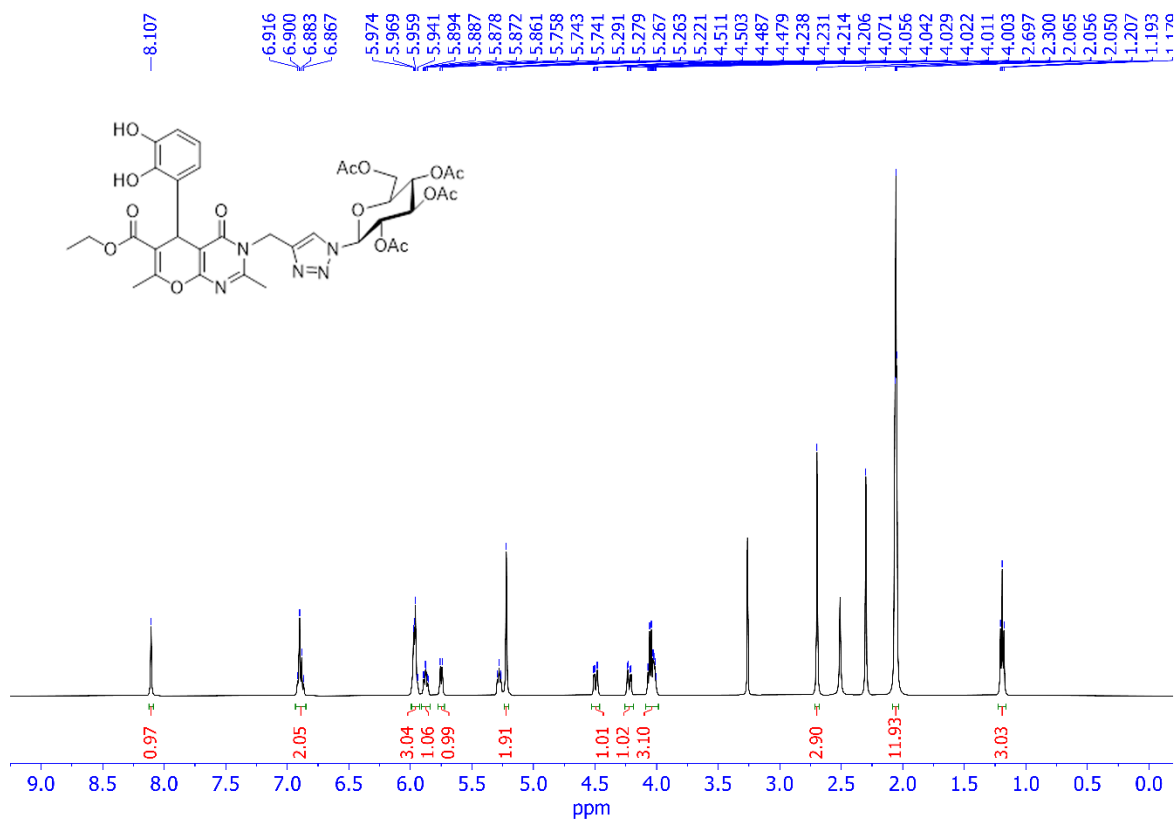

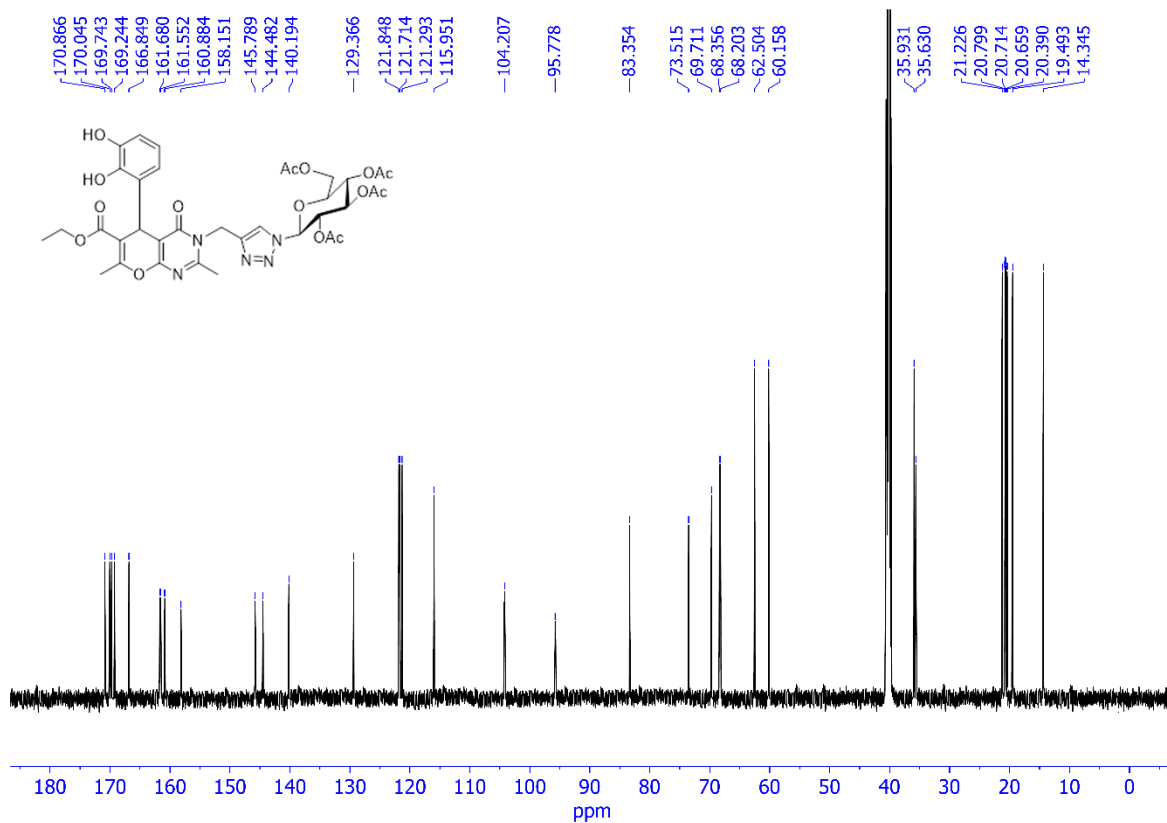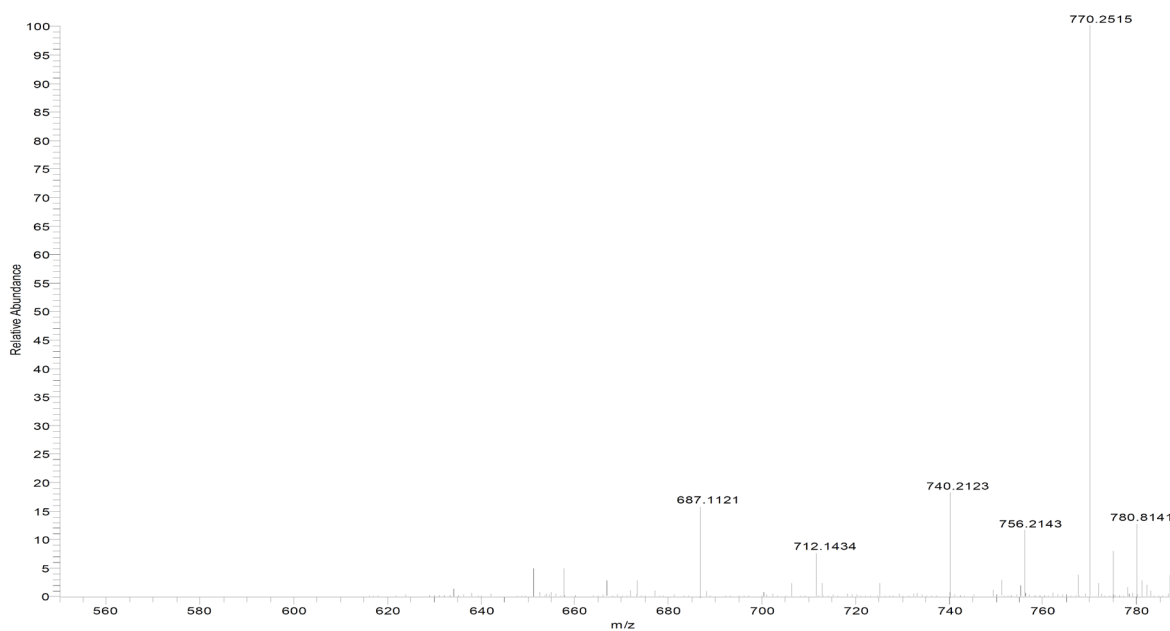

*Ethyl 3-(1-((2,3,4,6-tetra-O-acetyl-β-D-glucopyranosyl))-1H-1,2,3-triazol-4-yl)methyl-2,7-dimethyl-5-(2,4-dihydroxyphenyl)-4-oxo-3,5-dihydro-4H-pyrido[2,3-d]pyrimidin-6-carboxylate (**8n**)*

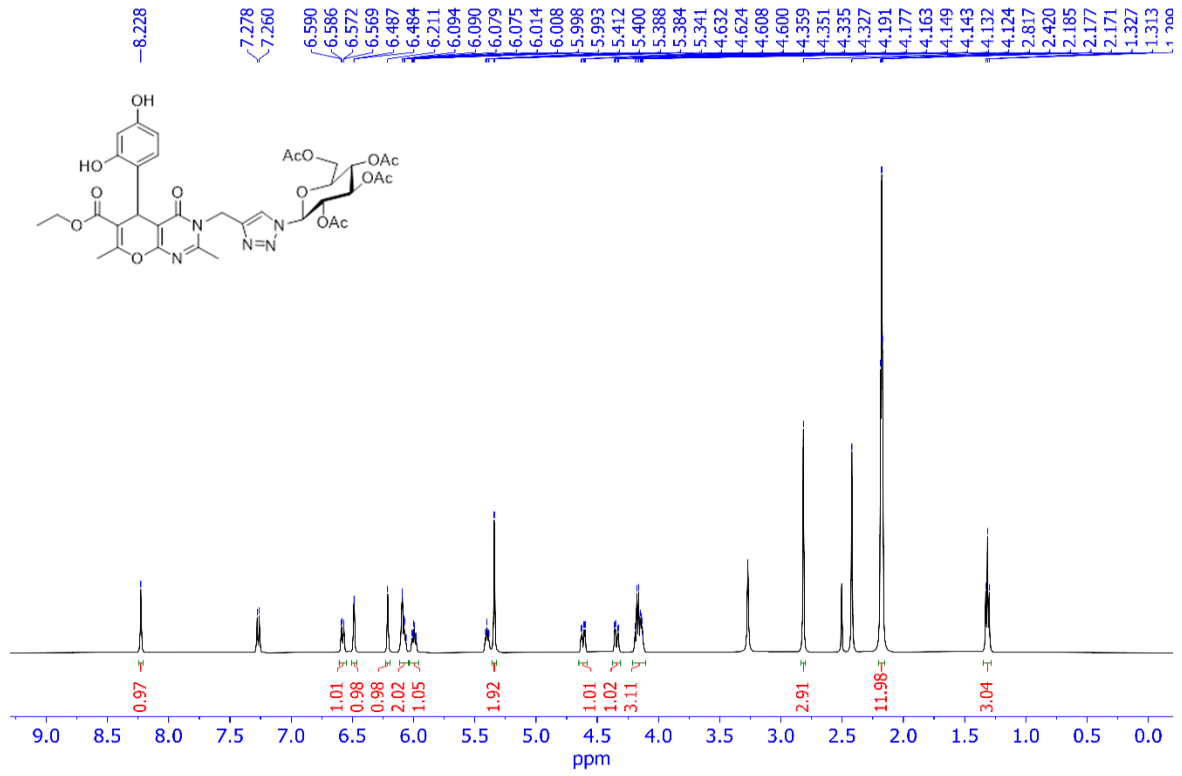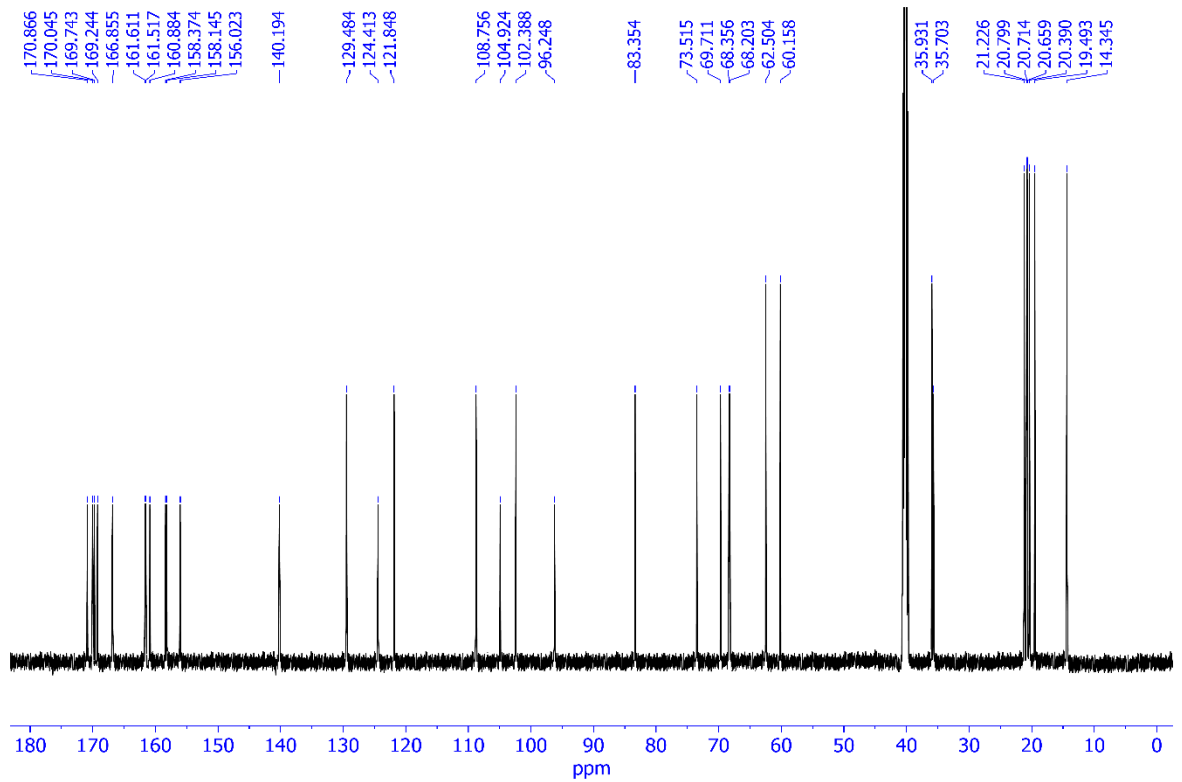

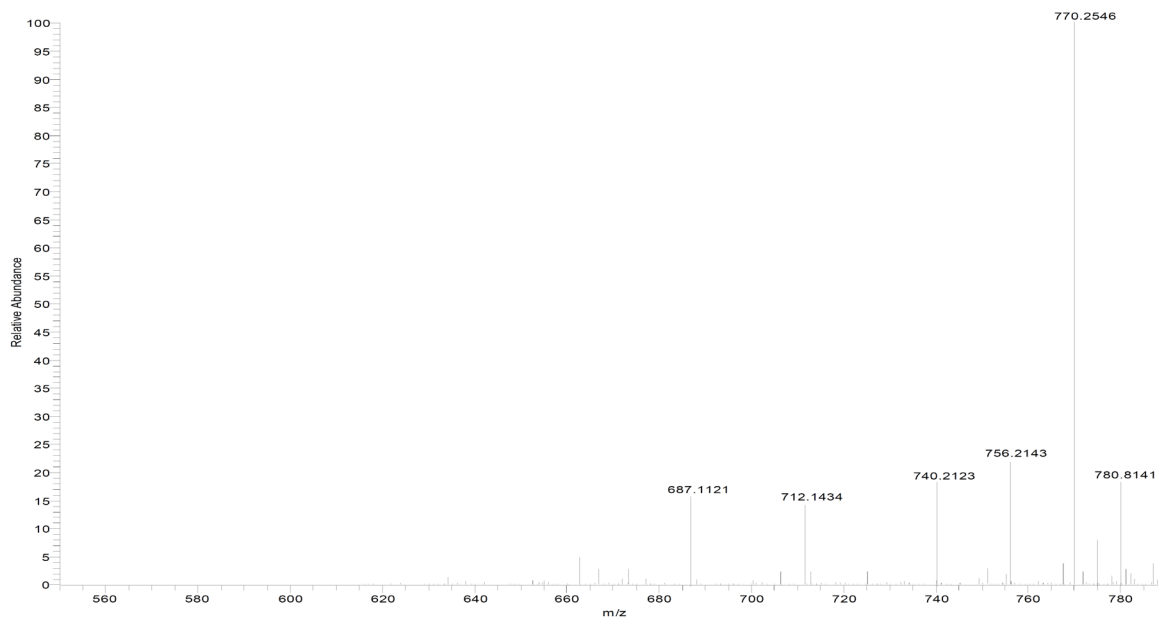

*Ethyl 3-(1-((2,3,4,6-tetra-O-acetyl- $\beta$ -D-glucopyranosyl))-1H-1,2,3-triazol-4-yl)methyl-2,7-dimethyl-5-(3,4-dimethoxyphenyl)-4-oxo-3,5-dihydro-4H-pyrano[2,3-d]pyrimidin-6-carboxylate (80)*

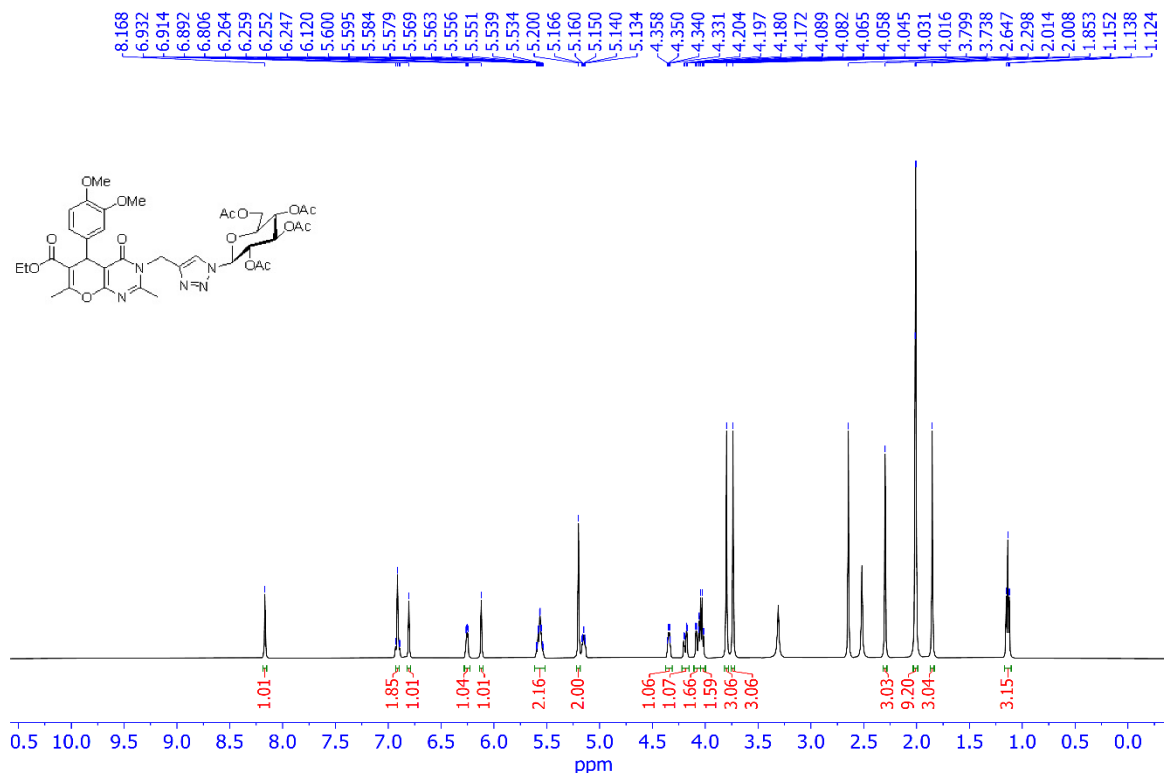



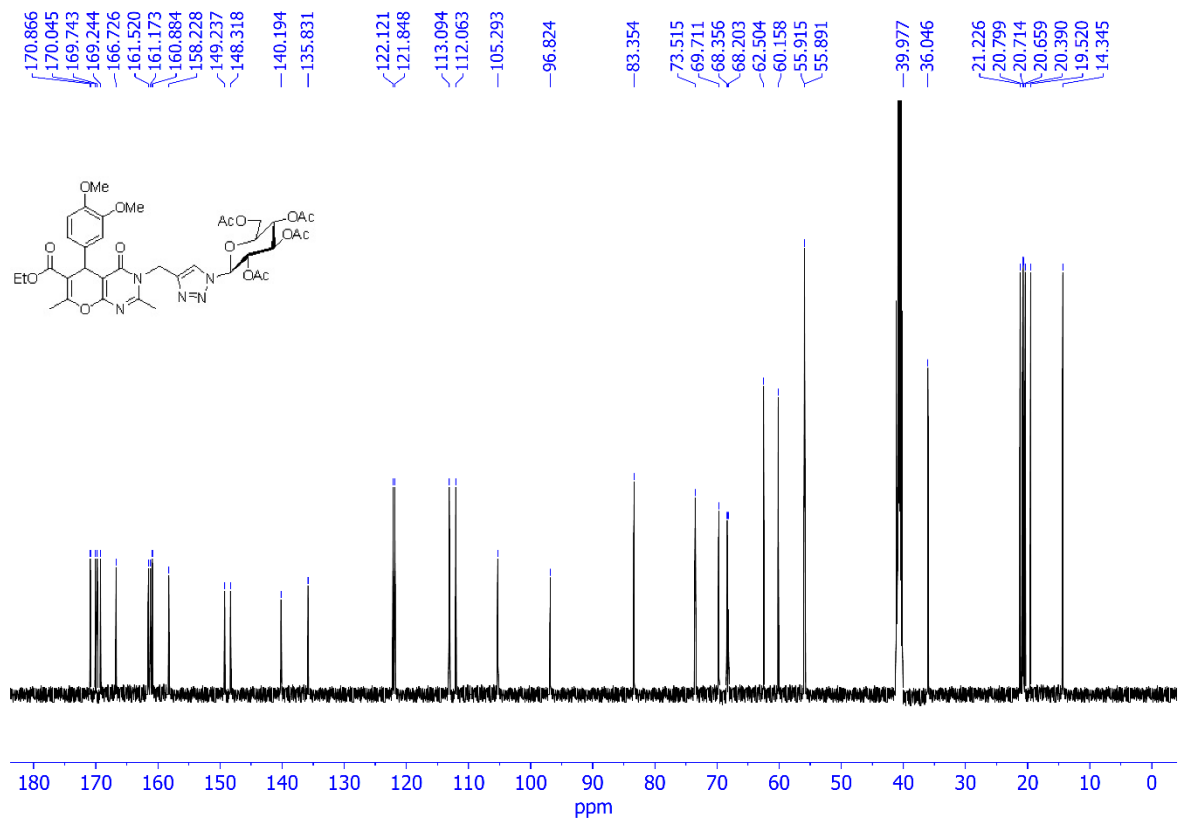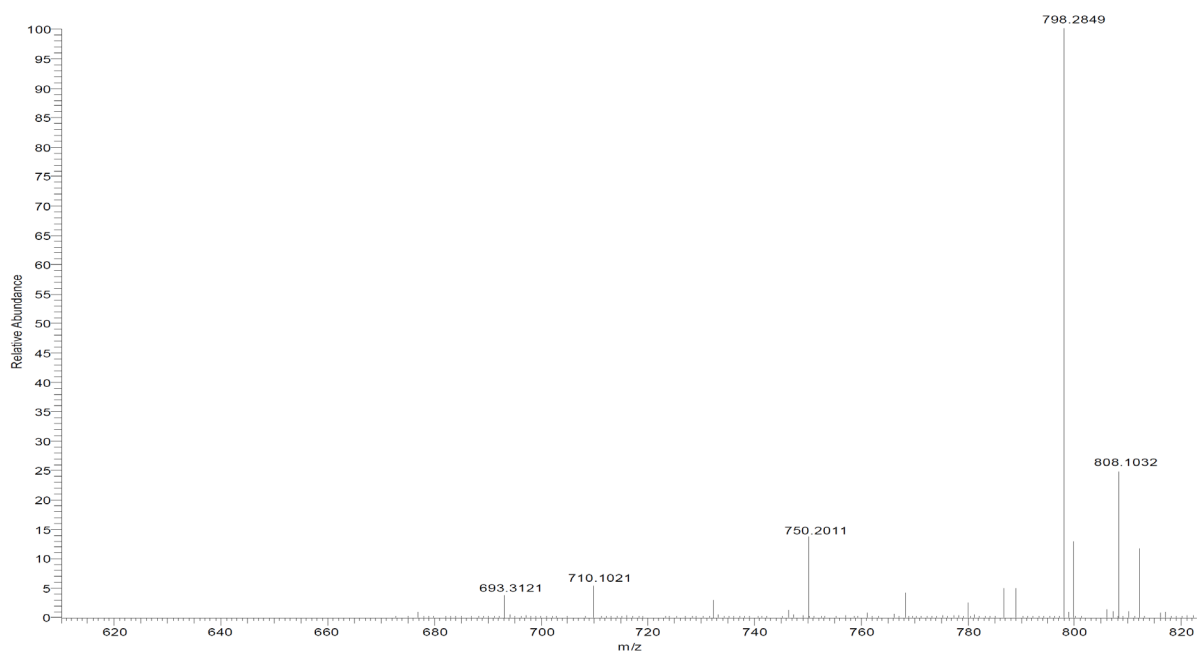

*Ethyl 3-(1-((2,3,4,6-tetra-O-acetyl-β-D-glucopyranosyl))-1H-1,2,3-triazol-4-yl)methyl-2,7-dimethyl-5-(2,4-dimethoxyphenyl)-4-oxo-3,5-dihydro-4H-pyrano[2,3-d]pyrimidin-6-carboxylate (8p)*

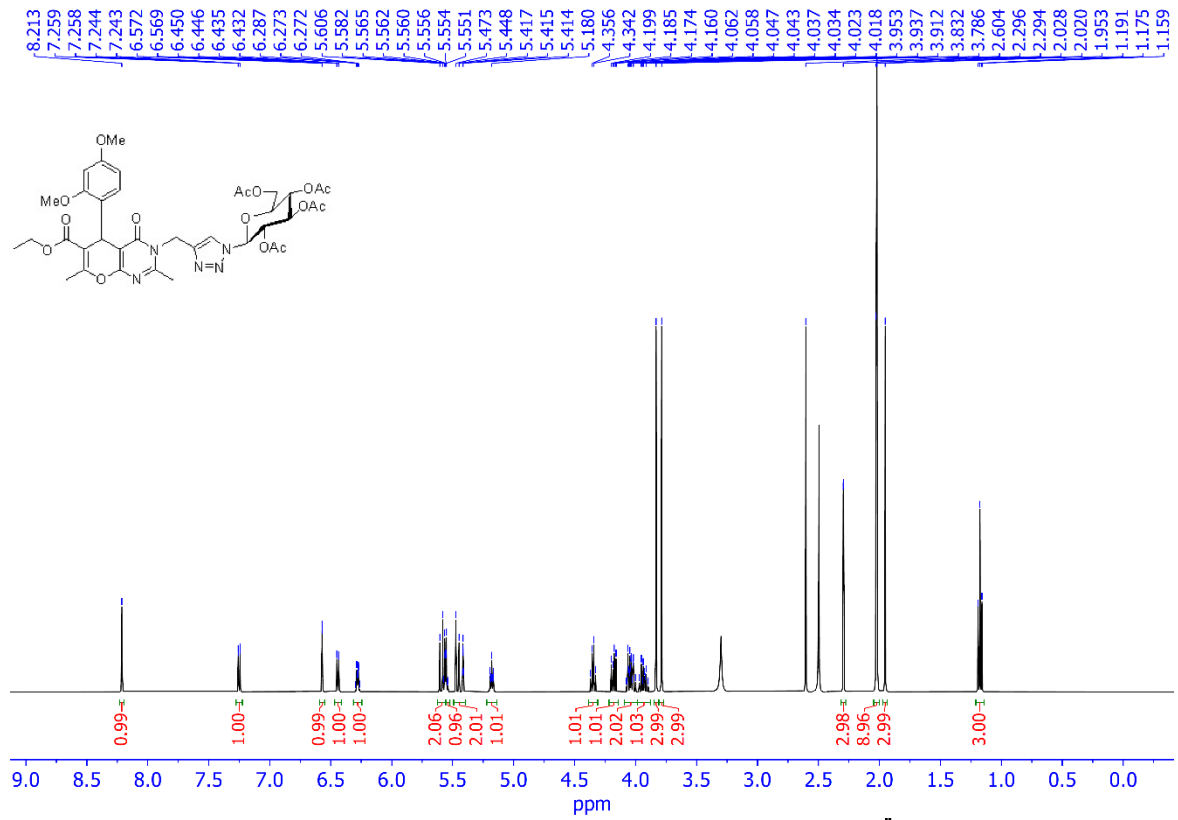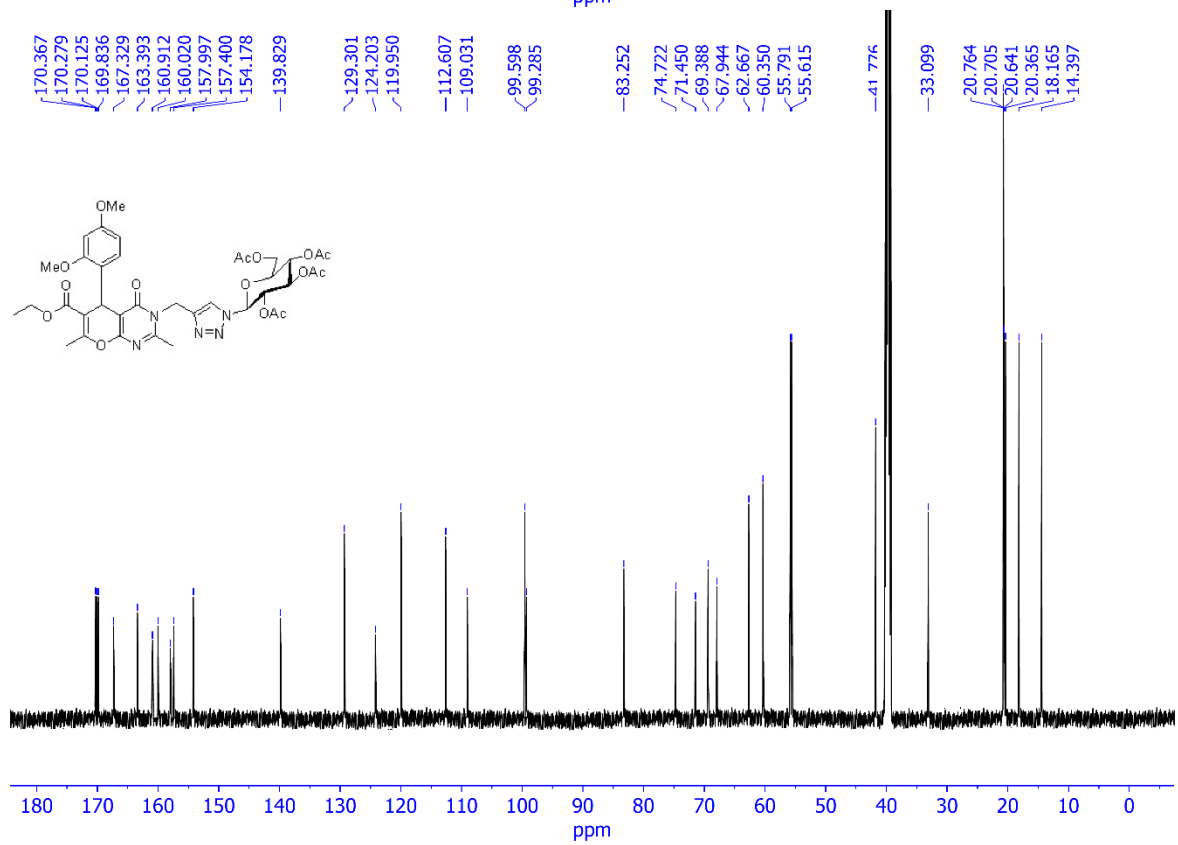

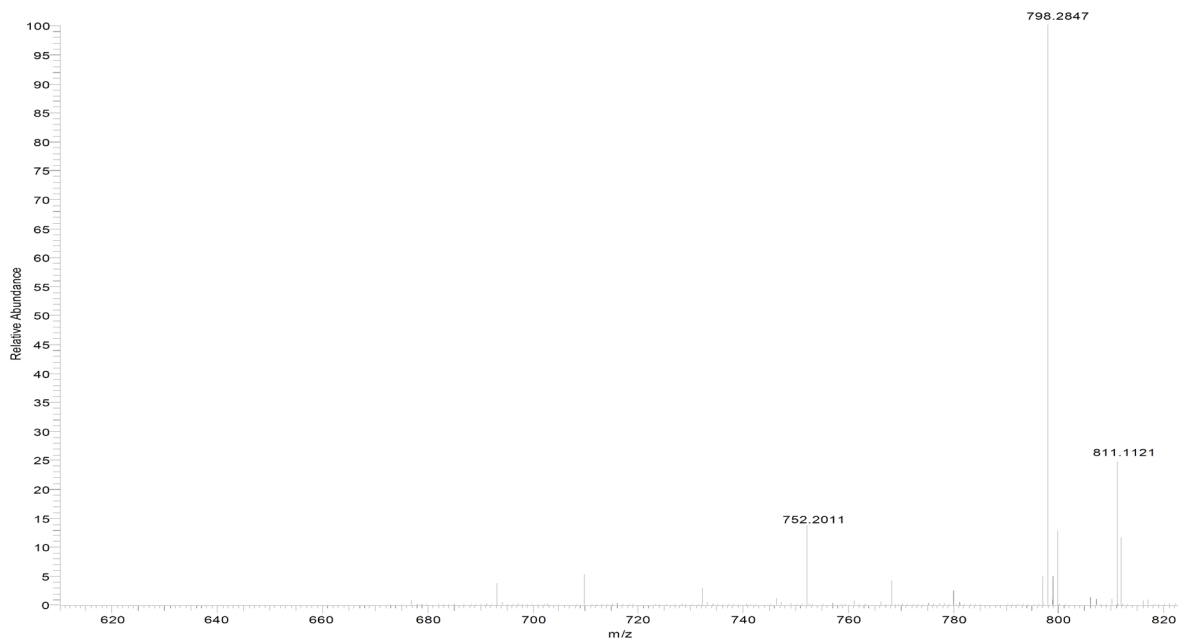

*Ethyl 3-(1-((2,3,4,6-tetra-O-acetyl- $\beta$ -D-glucopyranosyl))-1H-1,2,3-triazol-4-yl)methyl-2,7-dimethyl-5-(2,5-dimethoxyhenyl)-4-oxo-3,5-dihydro-4H-pyrano[2,3-d]pyrimidin-6-carboxylate (8q)*

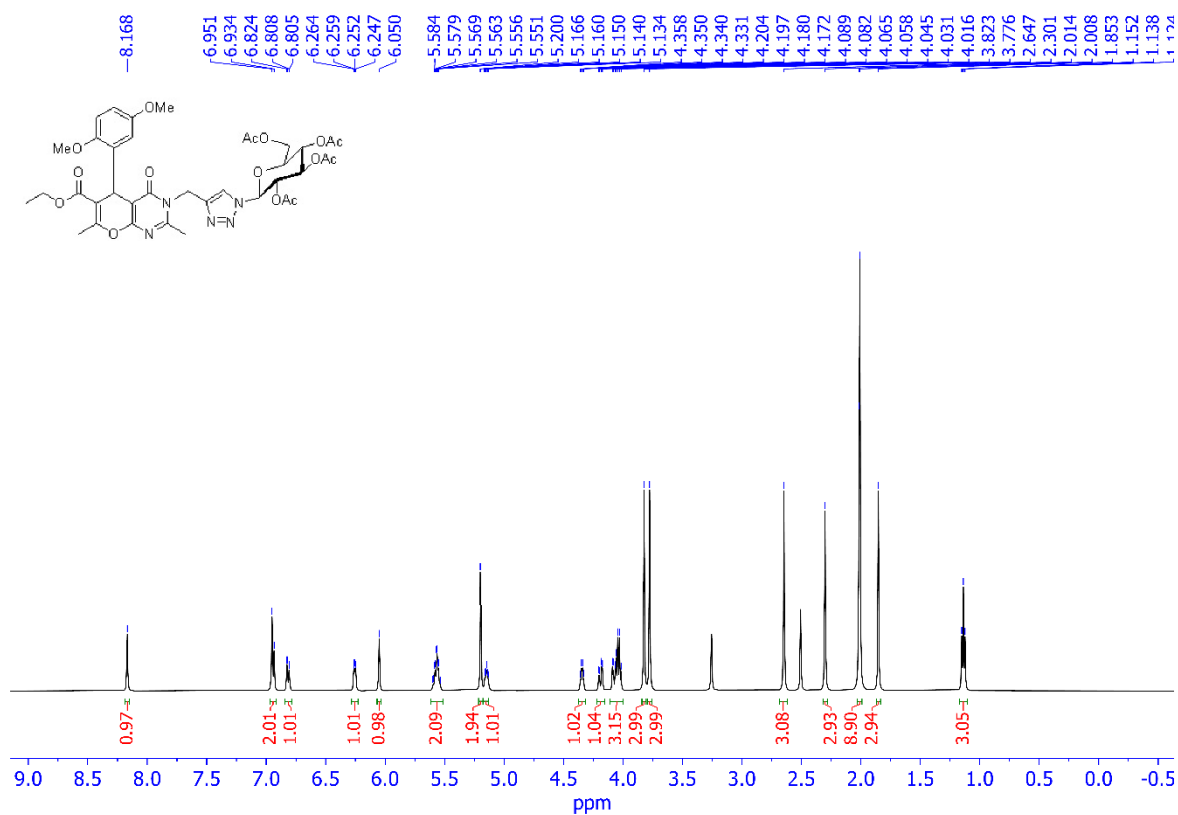

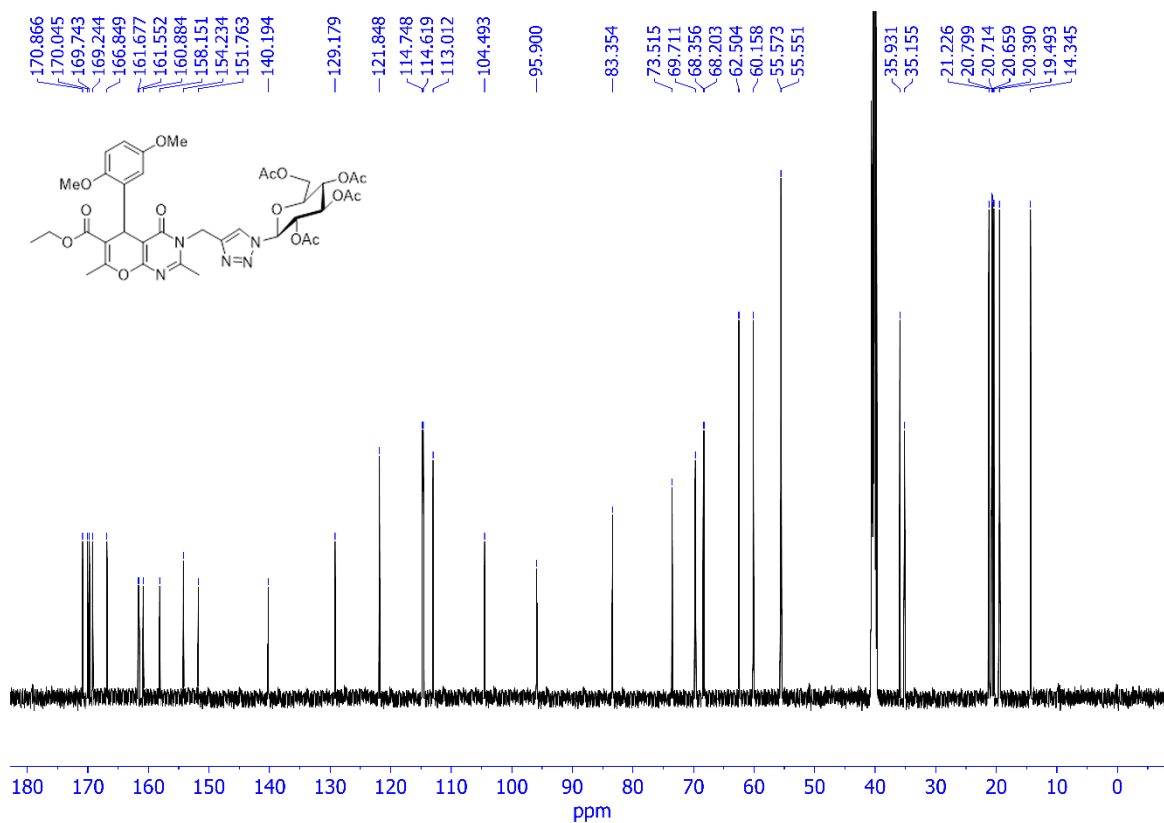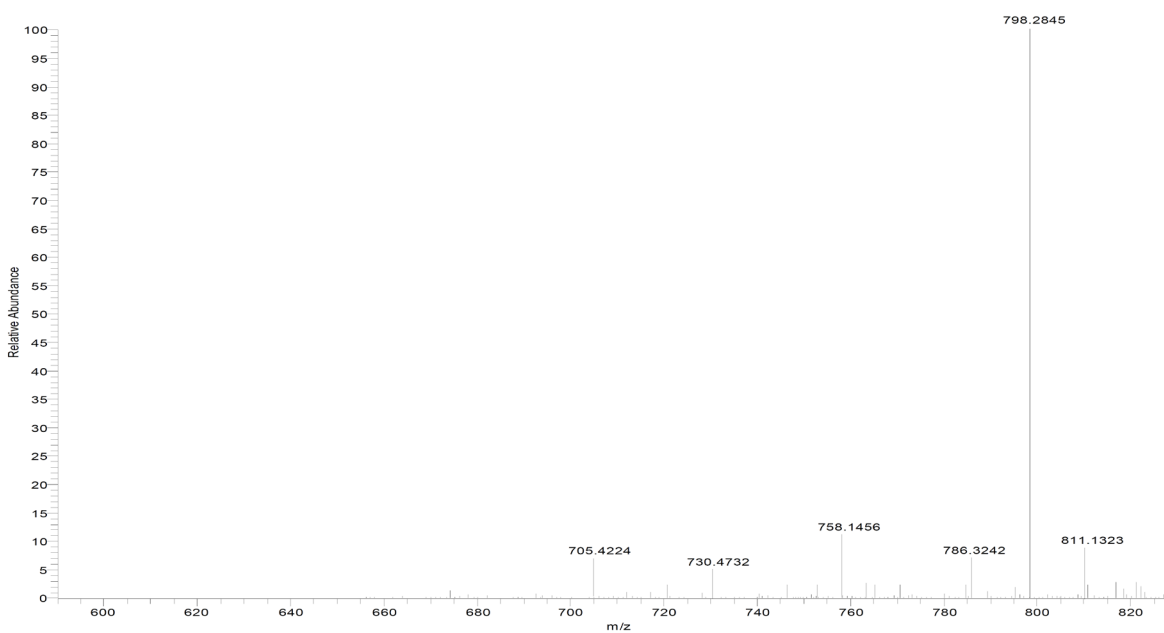

*Ethyl 3-(1-((2,3,4,6-tetra-O-acetyl- $\beta$ -D-glucopyranosyl))-1H-1,2,3-triazol-4-yl)methyl-2,7-dimethyl-5-(2,6-dimethoxyphenyl)-4-oxo-3,5-dihydro-4H-pyrano[2,3-d]pyrimidin-6-carboxylate (8r)*

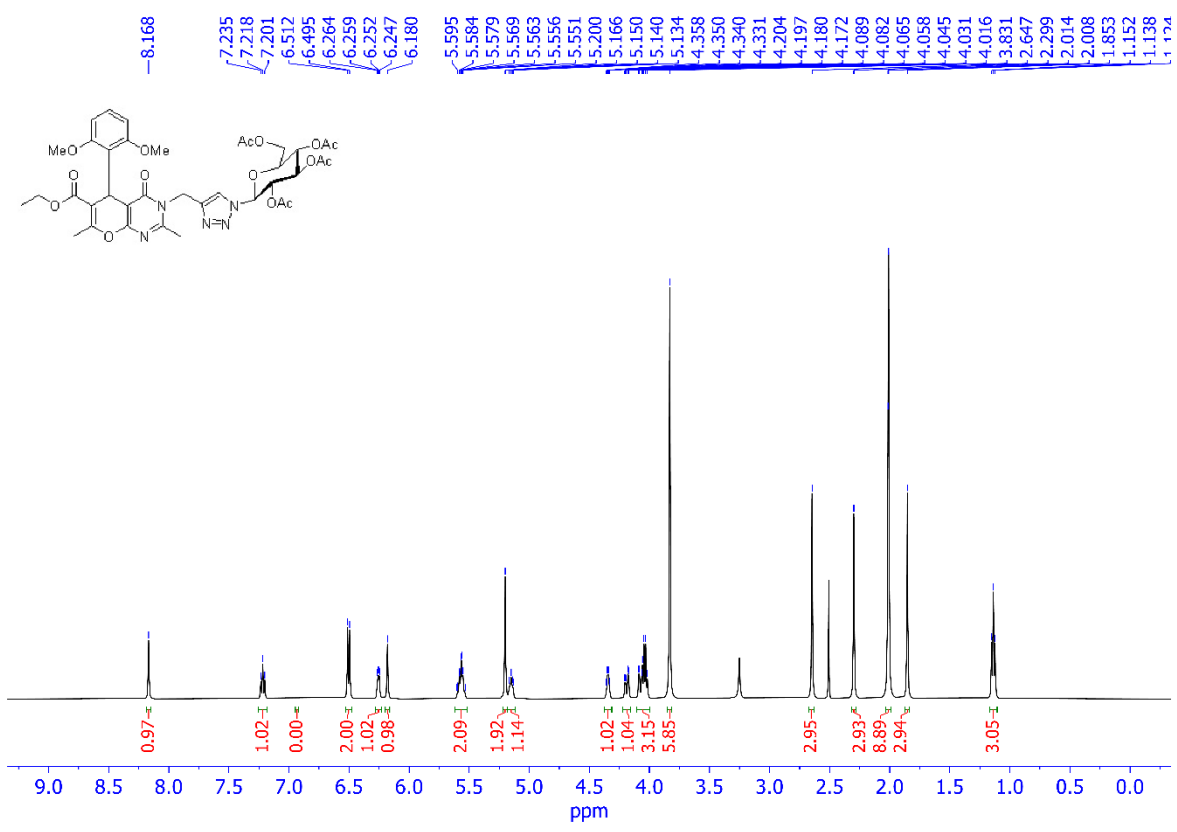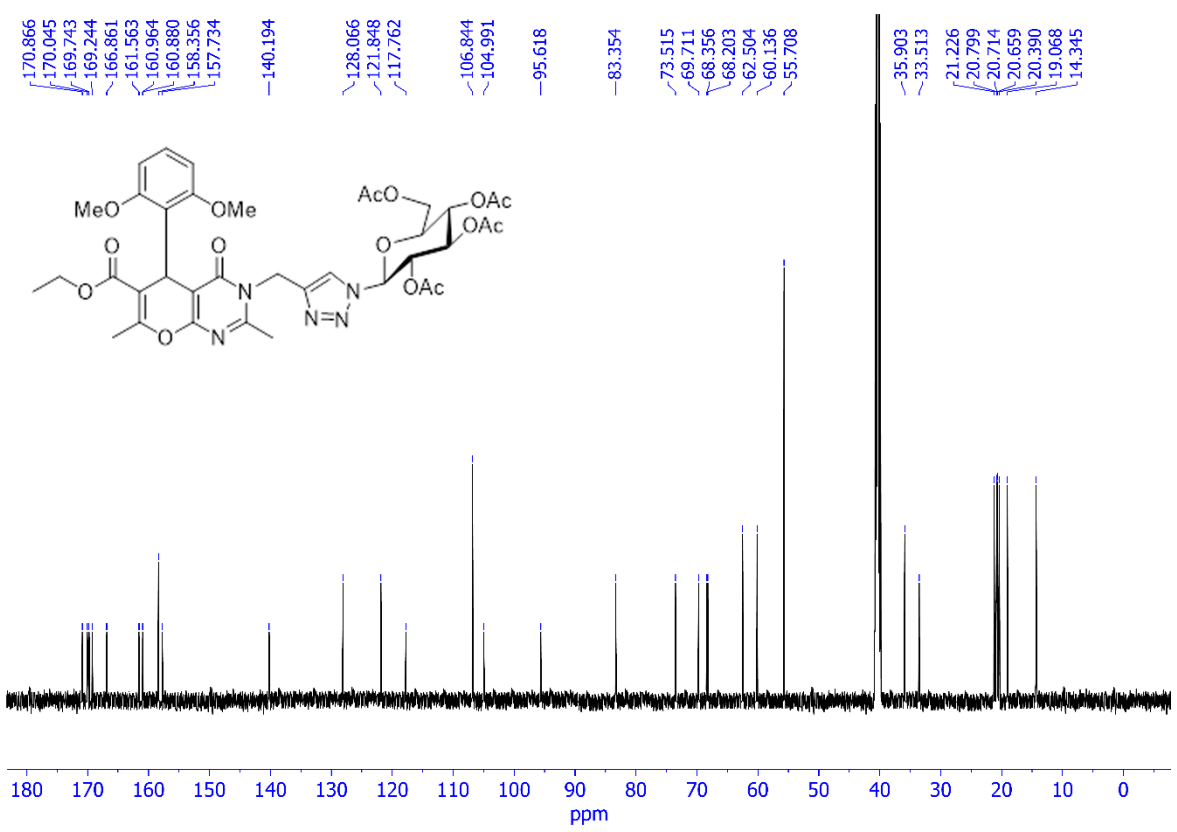

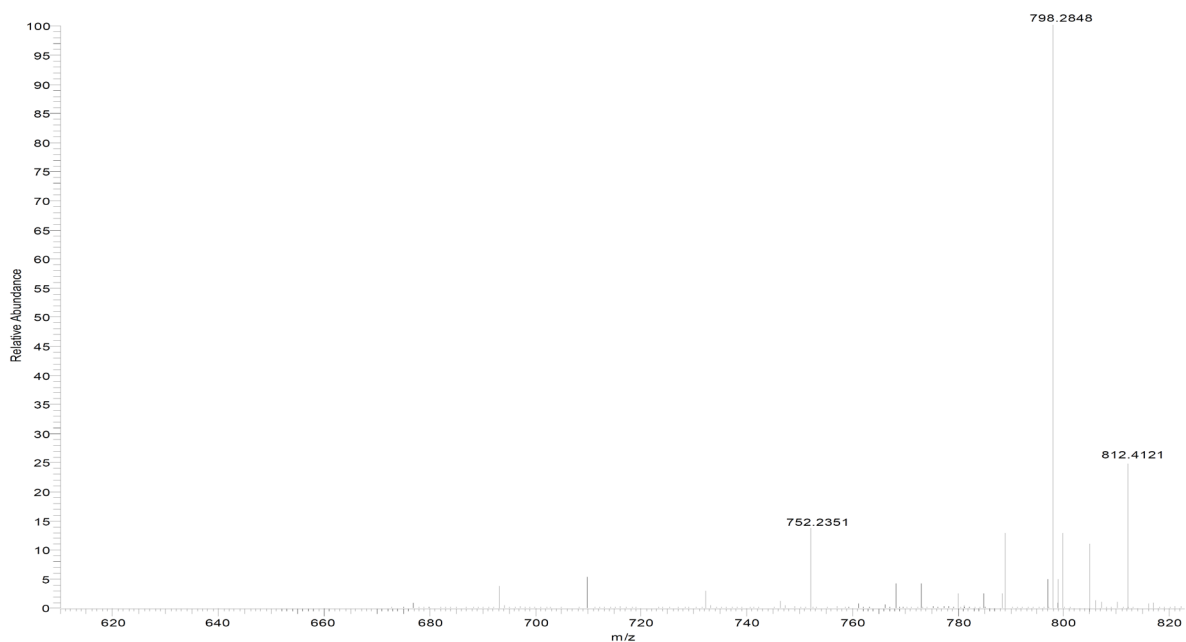

*Ethyl 3-(1-((2,3,4,6-tetra-O-acetyl-β-D-glucopyranosyl))-1H-1,2,3-triazol-4-yl)methyl-2,7-dimethyl-5-(4-dimethylaminophenyl)-4-oxo-3,5-dihydro-4H-pyrano[2,3-d]pyrimidin-6-carboxylate (8s)*

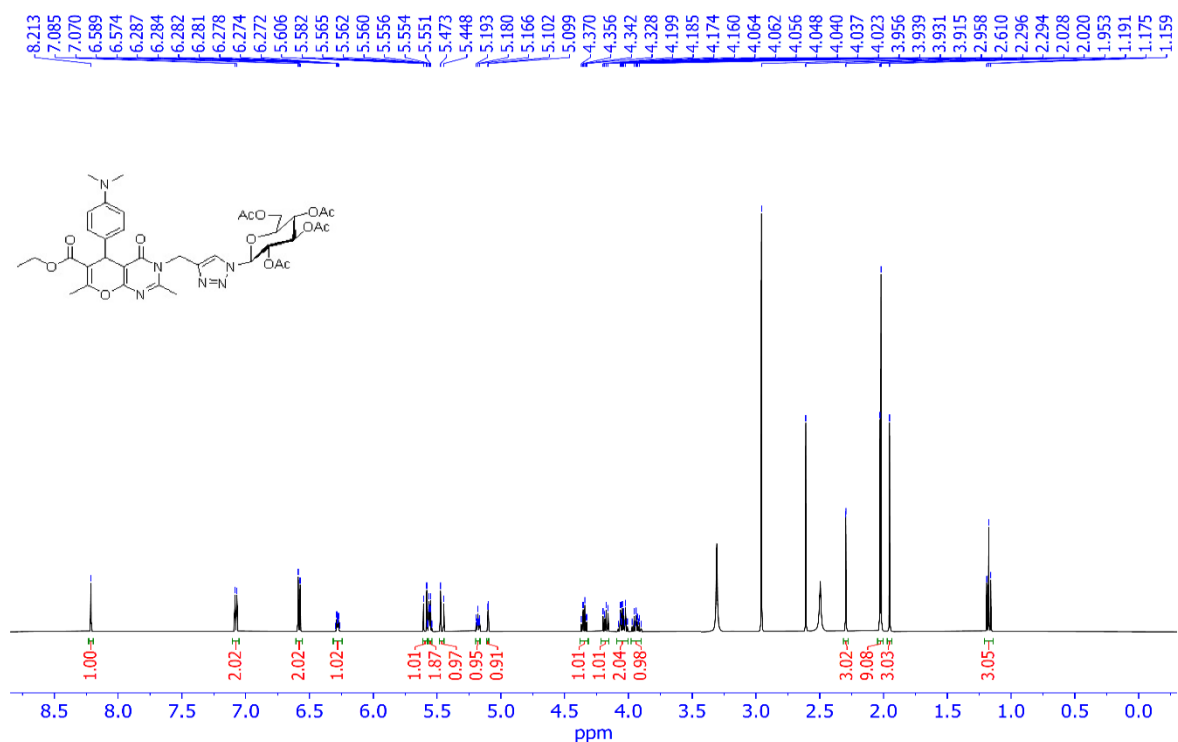

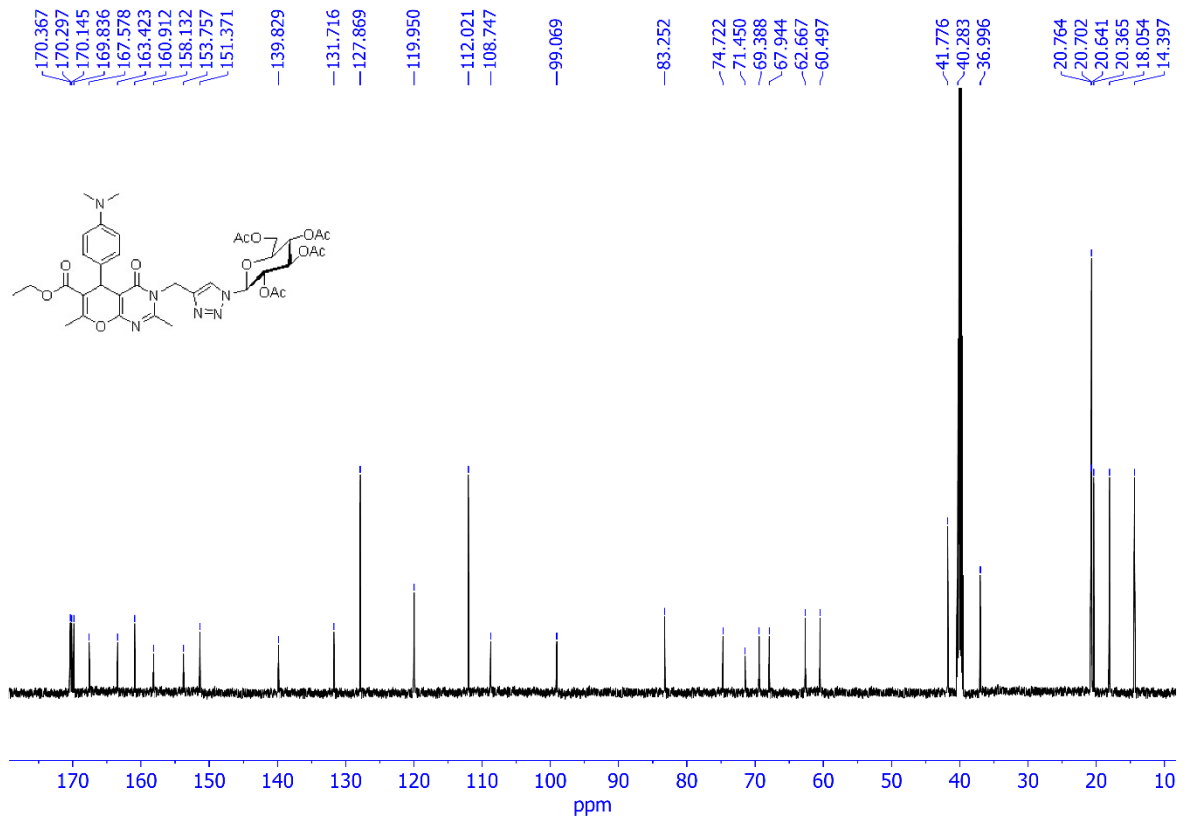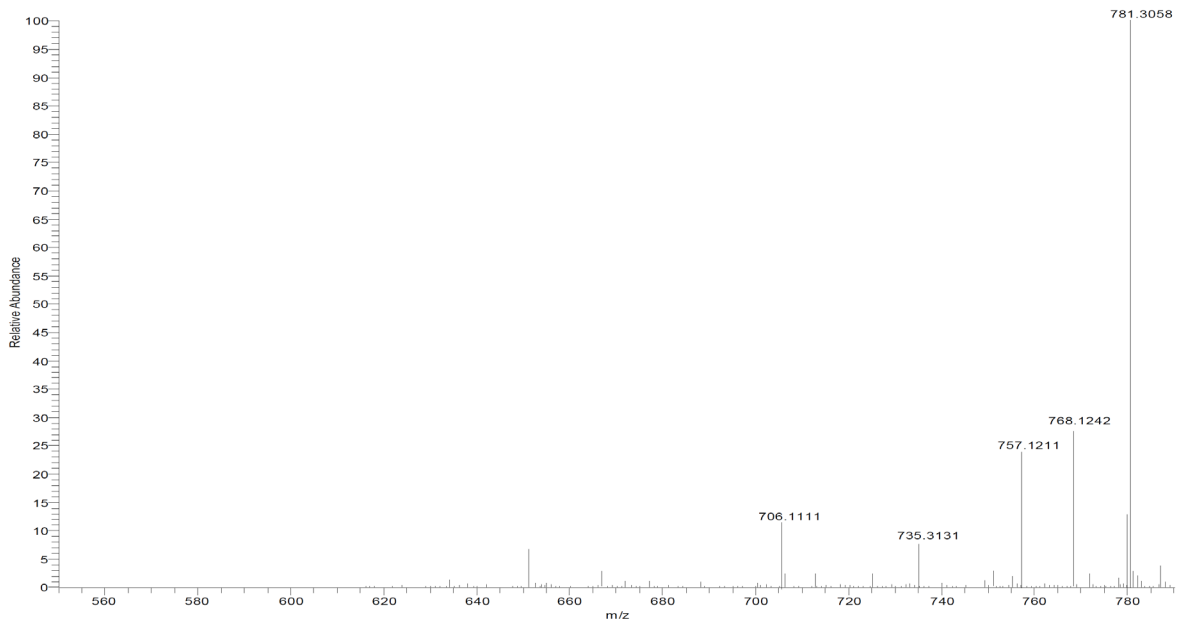

Supplement: d1nj05330b1.pdf [file d1nj05330b1.pdf]
